# Supplementary material
Source: publisher figshare collection journal article supplement (https://gsajournals.figshare.com/ndownloader/files/26193626)
Supplement: Supplementary file 1 [file 26193626]

## Sheet: Table S4
Table S4. Population structure analysis of the Ames panel. Included in the table are the first two principal components (PCs) calculated from the SNP genotype matrix (PC1 and PC2), assignment value (Q) for each subpopulation (subpopulations 1 to 3), group classification of lines following assignments of Romay et al. (2013), largest Q assignment value, and the subpopulation (Subpopulation 1, 2, 3,…
Accession number	Inbred line	Principal component 1 (PC1)	Principal component 2 (PC2)	Subpopulation1 (Q1)	Subpopulation2 (Q2)	Subpopulation3 (Q3)	Group	Largest Q-value	Category
AH83	AH83	5.81851	7.25598	0.834397	1e-06	0.165603	Unclassified	0.834397	Subpopulation1
Ames10244	Ab26	57.532	28.395	0.360744	0.619819	0.019437	Unclassified	0.619819	Admixed
Ames10247	GA152	12.7029	11.939	0.473165	0.372381	0.154454	Unclassified	0.473165	Admixed
Ames10249	GA212	28.1863	24.0435	0.411979	0.481493	0.106527	Unclassified	0.481493	Admixed
Ames10250	GA215	41.1205	20.4822	0.434502	0.504537	0.060961	Unclassified	0.504537	Admixed
Ames10251	GA219	30.139	31.8515	0.330863	0.577096	0.09204	Unclassified	0.577096	Admixed
Ames10252	GA222	42.7525	41.4021	0.237032	0.697992	0.064976	Unclassified	0.697992	Admixed
Ames10253	GE19	38.8215	27.2961	0.450767	0.478111	0.071121	Unclassified	0.478111	Admixed
Ames10254	GE54	36.5624	18.5142	0.518339	0.410173	0.071488	Unclassified	0.518339	Admixed
Ames10255	GE72	43.4545	27.2756	0.446897	0.503474	0.049628	Unclassified	0.503474	Admixed
Ames10256	GE129	44.9415	31.2377	0.433523	0.494837	0.07164	Unclassified	0.494837	Admixed
Ames10258	GE293	45.264	21.712	0.424654	0.535633	0.039713	Unclassified	0.535633	Admixed
Ames10259	GE311	46.8713	28.1468	0.475539	0.47872	0.045741	Unclassified	0.47872	Admixed
Ames10260	GE317	14.9627	48.4803	0.186336	0.665697	0.147967	Unclassified	0.665697	Admixed
Ames10261	GE335	27.9509	37.2636	0.324065	0.566022	0.109913	Unclassified	0.566022	Admixed
Ames10264	L605	51.2594	71.4749	1e-06	0.969368	0.030631	Unclassified	0.969368	Subpopulation2
Ames10265	L678	46.2565	11.9701	0.533439	0.420024	0.046537	Unclassified	0.533439	Admixed
Ames10267	SC15	48.2677	35.8565	0.260566	0.696832	0.042603	Unclassified	0.696832	Admixed
Ames10269	SC44	35.5453	37.9855	0.305525	0.603872	0.090602	Unclassified	0.603872	Admixed
Ames10271	SC84E	41.7424	33.8929	0.368225	0.56534	0.066435	Unclassified	0.56534	Admixed
Ames10272	SC90	26.3633	33.4671	0.306791	0.575024	0.118185	Unclassified	0.575024	Admixed
Ames10273	SC102	41.6233	26.7752	0.426243	0.517737	0.056019	Unclassified	0.517737	Admixed
Ames10274	SC144	32.041	19.2146	0.475314	0.421393	0.103293	Unclassified	0.475314	Admixed
Ames10276	SC225	29.2091	17.6232	0.497519	0.395296	0.107185	Unclassified	0.497519	Admixed
Ames10277	SC235	34.6276	27.0144	0.486671	0.424845	0.088484	Unclassified	0.486671	Admixed
Ames10287	ABPl3	30.3129	20.5462	0.568506	0.320886	0.110607	Unclassified	0.568506	Admixed
Ames12725	NC7	32.4225	18.8069	0.459261	0.440483	0.100256	Unclassified	0.459261	Admixed
Ames12726	NC13	37.2449	21.6332	0.55941	0.369458	0.071132	Unclassified	0.55941	Admixed
Ames12727	NC83	52.5913	33.695	0.467035	0.495495	0.03747	Unclassified	0.495495	Admixed
Ames12728	NC220	37.7178	26.274	0.317729	0.598716	0.083555	Unclassified	0.598716	Admixed
Ames12729	NC222	39.2981	22.2645	0.481443	0.425948	0.092609	Unclassified	0.481443	Admixed
Ames12730	NC224	44.4983	14.0369	0.641811	0.31851	0.039678	Unclassified	0.641811	Admixed
Ames12731	NC230	36.6478	22.6424	0.45577	0.469918	0.074312	Unclassified	0.469918	Admixed
Ames12732	NC232	37.3509	37.1118	0.377692	0.532997	0.08931	Unclassified	0.532997	Admixed
Ames12733	NC234	47.1139	20.5221	0.427391	0.510764	0.061845	Unclassified	0.510764	Admixed
Ames12734	NC236	25.8893	2.65814	0.549823	0.330872	0.119306	Unclassified	0.549823	Admixed
Ames12735	NC238	43.1291	35.204	0.319072	0.626918	0.05401	Unclassified	0.626918	Admixed
Ames12736	NC240A	31.0131	26.5356	0.326673	0.584034	0.089293	Unclassified	0.584034	Admixed
Ames12737	NC242	31.2826	34.9105	0.431298	0.452542	0.11616	Unclassified	0.452542	Admixed
Ames12738	NC244	32.4425	26.6251	0.444484	0.447513	0.108003	Unclassified	0.447513	Admixed
Ames12739	NC246	49.1897	48.9418	0.25342	0.70568	0.0409	Unclassified	0.70568	Subpopulation2
Ames12740	NC248	43.91	30.4493	0.319435	0.626098	0.054467	Unclassified	0.626098	Admixed
Ames12814	89S4083	-20.2865	4.76037	0.613632	0.112141	0.274226	Unclassified	0.613632	Admixed
Ames12815	89S4098	-230.33	-42.0258	0.101017	1e-06	0.898982	Unclassified	0.898982	Subpopulation3
Ames12816	89S4107	4.23134	20.6048	0.568507	0.231829	0.199664	Unclassified	0.568507	Admixed
Ames12817	89S4110	16.0028	2.37503	0.605486	0.270083	0.124431	Unclassified	0.605486	Admixed
Ames12818	89S4117	-188.062	18.757	1e-06	0.082263	0.917736	Unclassified	0.917736	Subpopulation3
Ames12819	89S4125	20.4556	2.82556	0.692306	0.179862	0.127833	Unclassified	0.692306	Admixed
Ames12820	89S4127	19.3126	-3.26168	0.720721	0.147677	0.131602	Unclassified	0.720721	Subpopulation1
Ames12822	89S4154	-2.58643	-21.3824	0.741077	0.062156	0.196768	Unclassified	0.741077	Subpopulation1
Ames12823	89S4157	-6.12701	-6.80955	0.701815	0.085424	0.212762	Unclassified	0.701815	Subpopulation1
Ames12824	89S4190	-145.659	24.6356	0.203233	1e-06	0.796766	Unclassified	0.796766	Subpopulation3
Ames14111	T202	33.1073	24.5658	0.494772	0.417758	0.08747	Unclassified	0.494772	Admixed
Ames14112	Va3A	24.0941	21.7221	0.432656	0.440975	0.126369	Unclassified	0.440975	Admixed
Ames14113	Va12C	55.6351	-10.5282	0.622768	0.365145	0.012087	Unclassified	0.622768	Admixed
Ames14114	Va14A	74.9046	-136.438	0.931889	0.068003	0.000109	Unclassified	0.931889	Subpopulation1
Ames14115	Va35C	58.1852	-42.6182	0.713123	0.285782	0.001096	Non-stiff stalk	0.713123	Subpopulation1
Ames14116	Va36A	54.1234	-44.0952	0.767281	0.22592	0.006799	Non-stiff stalk	0.767281	Subpopulation1
Ames14211	EAST028WHITECOB	28.3686	44.8001	0.353638	0.549156	0.097206	Unclassified	0.549156	Admixed
Ames15929		28.1402	3.77071	0.874419	0.039024	0.086557	Unclassified	0.874419	Subpopulation1
Ames18999	Ab28A	30.4466	13.2872	0.501045	0.405664	0.093291	Unclassified	0.501045	Admixed
Ames19000	VaW6	42.198	-16.3547	0.652583	0.290487	0.056929	Unclassified	0.652583	Admixed
Ames19001	Va16	36.955	-40.8536	0.87057	0.055144	0.074286	Unclassified	0.87057	Subpopulation1
Ames19002	Va17	43.2981	-16.0853	0.793033	0.172852	0.034115	Unclassified	0.793033	Subpopulation1
Ames19003	Va18A	30.6099	-48.2803	0.874518	0.025694	0.099789	Unclassified	0.874518	Subpopulation1
Ames19004	Va21A	35.8477	-16.1447	0.783754	0.141548	0.074697	Unclassified	0.783754	Subpopulation1
Ames19006	Va22B	51.1093	-0.49055	0.593207	0.378333	0.02846	Non-stiff stalk	0.593207	Admixed
Ames19007	Va23	61.5255	-27.3513	0.767803	0.225517	0.00668	Unclassified	0.767803	Subpopulation1
Ames19008	Va24	47.7242	-32.0156	0.776384	0.205303	0.018313	Unclassified	0.776384	Subpopulation1
Ames19010	Va37	32.3325	3.19542	0.591984	0.322005	0.086011	Unclassified	0.591984	Admixed
Ames19011	Va38	56.6592	-9.34037	0.659143	0.330203	0.010654	Unclassified	0.659143	Admixed
Ames19012	Va39	39.972	-16.6258	0.870545	0.070819	0.058636	Unclassified	0.870545	Subpopulation1
Ames19013	Va46	45.8208	-24.2794	0.777064	0.18709	0.035846	Unclassified	0.777064	Subpopulation1
Ames19014	Va52	54.1203	-69.9258	0.986867	0.000493	0.01264	Unclassified	0.986867	Subpopulation1
Ames19015	Va58	69.1542	-42.6516	0.740247	0.259753	1e-06	Unclassified	0.740247	Subpopulation1
Ames19016	Va59	68.3787	-89.8468	0.785959	0.214041	1e-06	Non-stiff stalk	0.785959	Subpopulation1
Ames19019	Va91	24.6005	-9.43211	0.744587	0.147135	0.108278	Unclassified	0.744587	Subpopulation1
Ames19283	B37TRf	-57.5012	4.73257	0.533323	1e-06	0.466677	Stiff stalk	0.533323	Admixed
Ames19284	C103	86.9556	-201.896	0.999999	0	0	Non-stiff stalk	0.999999	Subpopulation1
Ames19287	Mo17TRf	81.0461	-257.992	0.999999	0	1e-06	Non-stiff stalk	0.999999	Subpopulation1
Ames19288	Oh43	56.3322	-82.0825	0.999999	0	0	Non-stiff stalk	0.999999	Subpopulation1
Ames19290	Oh43TRf	55.6307	-76.4054	0.999999	1e-06	1e-06	Non-stiff stalk	0.999999	Subpopulation1
Ames19293	Wf9	28.4894	-19.978	0.94808	1e-06	0.051919	Stiff stalk	0.94808	Subpopulation1
Ames19308	A634	-149.779	42.4119	0.139412	0.028037	0.832552	Stiff stalk	0.832552	Subpopulation3
Ames19309	A635	-177.323	37.866	0.079963	0	0.920036	Stiff stalk	0.920036	Subpopulation3
Ames19310	A639	-97.7993	30.1283	0.384227	0.054684	0.561089	Unclassified	0.561089	Admixed
Ames19313	C123	61.2493	-90.6896	0.810919	0.163305	0.025776	Non-stiff stalk	0.810919	Subpopulation1
Ames19314	CI64	45.1908	47.6659	0.201389	0.752378	0.046233	Unclassified	0.752378	Subpopulation2
Ames19316	CM174	-115.045	37.7879	0.330549	1e-06	0.66945	Unclassified	0.66945	Admixed
Ames19318	H107	32.5018	-36.7923	0.903587	0.022373	0.07404	Non-stiff stalk	0.903587	Subpopulation1
Ames19319	H95	48.8285	-22.9598	0.795952	0.177072	0.026976	Non-stiff stalk	0.795952	Subpopulation1
Ames19321	N28	-31.5516	-8.73133	0.560715	0.10287	0.336415	Unclassified	0.560715	Admixed
Ames19323	Oh7B	4.2177	19.9753	0.735266	0.075579	0.189155	Unclassified	0.735266	Subpopulation1
Ames19324	Pa871	50.9828	-29.004	0.787691	0.173421	0.038888	Unclassified	0.787691	Subpopulation1
Ames19326	R168	28.0601	19.5618	0.783518	0.131659	0.084823	Unclassified	0.783518	Subpopulation1
Ames19327	Tx303	60.3435	35.5856	0.260724	0.724022	0.015253	Unclassified	0.724022	Subpopulation2
Ames19328	Va22	58.5104	-26.6824	0.70239	0.287128	0.010482	Non-stiff stalk	0.70239	Subpopulation1
Ames19330	W182B	11.4266	-3.46871	0.739649	0.110791	0.14956	Unclassified	0.739649	Subpopulation1
Ames20116	Mo23W	42.4957	23.2276	0.461155	0.471438	0.067407	Unclassified	0.471438	Admixed
Ames20118	Mo25W	27.5205	26.8594	0.399935	0.500375	0.09969	Unclassified	0.500375	Admixed
Ames20119	Mo40	48.6231	-158.758	0.955464	1e-06	0.044536	Unclassified	0.955464	Subpopulation1
Ames20120	Mo42	67.5422	-177.535	0.991486	1e-06	0.008513	Non-stiff stalk	0.991486	Subpopulation1
Ames20136	H21W	38.1816	16.0197	0.549266	0.375607	0.075127	Unclassified	0.549266	Admixed
Ames20137	H25W	40.8683	19.2863	0.56396	0.371725	0.064316	Non-stiff stalk	0.56396	Admixed
Ames20140	Mt42	37.9125	30.2755	0.542945	0.368285	0.08877	Unclassified	0.542945	Admixed
Ames21095	R12	49.2764	35.6907	0.393771	0.555854	0.050376	Unclassified	0.555854	Admixed
Ames21096	R35	33.5239	21.4954	0.496647	0.401953	0.1014	Unclassified	0.496647	Admixed
Ames21512	CI31A	35.3286	16.9441	0.553604	0.356513	0.089883	Unclassified	0.553604	Admixed
Ames22441	CH157	20.4353	12.2683	0.652339	0.214649	0.133012	Unclassified	0.652339	Admixed
Ames22442	Ms100	45.6795	5.95578	0.673633	0.285571	0.040796	Unclassified	0.673633	Admixed
Ames22443	A188	46.2595	9.78978	0.565331	0.377119	0.057549	Unclassified	0.565331	Admixed
Ames22748	H100	-176.277	34.1607	0.091856	1e-06	0.908143	Stiff stalk	0.908143	Subpopulation3
Ames22750	H112	27.6175	-30.5436	0.910479	5.1e-05	0.08947	Non-stiff stalk	0.910479	Subpopulation1
Ames22751	H114	-64.0923	0.727792	0.467134	0.086303	0.446563	Unclassified	0.467134	Admixed
Ames22752	H119	-249.224	-10.247	0.006844	1e-06	0.993155	Unclassified	0.993155	Subpopulation3
Ames22753	H123	-235.254	-28.0399	0.050522	0	0.949477	Stiff stalk	0.949477	Subpopulation3
Ames22754	K55	42.3425	22.2941	0.468111	0.472457	0.059432	Unclassified	0.472457	Admixed
Ames22755	N197	88.6665	-251.299	0.999999	0	1e-06	Non-stiff stalk	0.999999	Subpopulation1
Ames22756	Os426	2.94052	12.4863	0.641054	0.177672	0.181274	Stiff stalk	0.641054	Admixed
Ames22757	Pa405	28.343	12.6905	0.683986	0.218654	0.09736	Non-stiff stalk	0.683986	Admixed
Ames22760	Tx71	44.6781	47.5996	0.223886	0.707763	0.068351	Unclassified	0.707763	Subpopulation2
Ames22761	Tx81	46.1412	47.8479	0.228672	0.711687	0.059641	Unclassified	0.711687	Subpopulation2
Ames22762	Tx118	66.0118	-130.948	0.734916	0.259772	0.005311	Unclassified	0.734916	Subpopulation1
Ames22792	ABPl2	28.3009	22.9456	0.567055	0.315614	0.117331	Unclassified	0.567055	Admixed
Ames22793	ABPl4	41.0445	12.5863	0.579456	0.332115	0.088429	Unclassified	0.579456	Admixed
Ames22794	ABPl5	89.1266	-251.89	0.999999	0	1e-06	Unclassified	0.999999	Subpopulation1
Ames2327	Lai1029	20.5579	-4.52113	0.599373	0.23712	0.163507	Unclassified	0.599373	Admixed
Ames2328	North7	52.8106	-0.145029	0.519992	0.468157	0.011851	Unclassified	0.519992	Admixed
Ames2329	SW322	58.0125	-9.08609	0.687973	0.305425	0.006602	Unclassified	0.687973	Admixed
Ames2330	East028	40.5351	34.2401	0.464935	0.465526	0.069539	Unclassified	0.465526	Admixed
Ames2331	Yellow3-4	74.7235	85.2036	0	0.999999	0	Unclassified	0.999999	Subpopulation2
Ames2332	Bei10=North10	26.8086	18.4424	0.515946	0.378069	0.105986	Unclassified	0.515946	Admixed
Ames2333	Yong28	46.4019	26.5584	0.377083	0.58228	0.040638	Unclassified	0.58228	Admixed
Ames2334	Yong28br2	47.3111	29.2447	0.369933	0.595039	0.035029	Unclassified	0.595039	Admixed
Ames2335	Ye4	73.4791	76.9472	1e-06	0.999999	0	Unclassified	0.999999	Subpopulation2
Ames2336	52220	65.6785	47.0019	0.186828	0.801661	0.01151	Unclassified	0.801661	Subpopulation2
Ames2337	Huanyao	73.8777	77.3684	1e-06	0.999999	1e-06	Unclassified	0.999999	Subpopulation2
Ames2338	TwanxTzuh-S6	63.1925	22.1291	0.38041	0.619589	1e-06	Unclassified	0.619589	Admixed
Ames23389	A15	34.9233	13.2914	0.602271	0.313446	0.084284	Unclassified	0.602271	Admixed
Ames2339	Huobai	51.4546	67.2081	0.130308	0.845485	0.024208	Unclassified	0.845485	Subpopulation2
Ames23391	A34	55.3642	13.4742	0.571677	0.408158	0.020165	Unclassified	0.571677	Admixed
Ames23392	A90	57.6622	27.9768	0.596411	0.379865	0.023724	Unclassified	0.596411	Admixed
Ames23393	A96	35.217	13.8355	0.652878	0.241838	0.105284	Unclassified	0.652878	Admixed
Ames23394	A116	23.9381	11.4743	0.727464	0.162153	0.110383	Unclassified	0.727464	Subpopulation1
Ames23395	A152	58.3041	3.81603	0.710008	0.278562	0.01143	Unclassified	0.710008	Subpopulation1
Ames23396	A155	51.9924	4.91135	0.685828	0.29869	0.015482	Unclassified	0.685828	Admixed
Ames23397	A158	53.7379	8.52531	0.70538	0.257444	0.037176	Unclassified	0.70538	Subpopulation1
Ames23398	A166	31.6102	20.1135	0.623839	0.28954	0.08662	Unclassified	0.623839	Admixed
Ames23399	A201	51.5462	1.79824	0.800154	0.172108	0.027738	Unclassified	0.800154	Subpopulation1
Ames2340	WFg3-9	34.3143	33.985	0.375656	0.524917	0.099427	Unclassified	0.524917	Admixed
Ames23400	A203	51.2127	2.38339	0.796152	0.176348	0.027501	Unclassified	0.796152	Subpopulation1
Ames23401	A204	41.9136	0.810781	0.792414	0.154193	0.053392	Unclassified	0.792414	Subpopulation1
Ames23402	A208	46.5018	9.2723	0.669655	0.280315	0.05003	Unclassified	0.669655	Admixed
Ames23403	A218	17.255	3.41244	0.782069	0.097465	0.120467	Unclassified	0.782069	Subpopulation1
Ames23404	A223	20.8947	6.92102	0.8422	0.022631	0.135169	Unclassified	0.8422	Subpopulation1
Ames23405	A239	16.2557	6.86138	0.795415	0.049873	0.154712	Unclassified	0.795415	Subpopulation1
Ames23406	A251	14.4141	18.7206	0.618108	0.240352	0.141541	Unclassified	0.618108	Admixed
Ames23407	A257	19.2034	12.8223	0.837946	0.033932	0.128123	Unclassified	0.837946	Subpopulation1
Ames23408	A260	11.8244	-3.06735	0.697403	0.1526	0.149997	Unclassified	0.697403	Admixed
Ames23409	A264	32.6516	-6.65905	0.722359	0.176475	0.101167	Unclassified	0.722359	Subpopulation1
Ames2341	S330	65.7113	-46.8283	0.838678	0.161321	1e-06	Unclassified	0.838678	Subpopulation1
Ames23410	A265	13.0701	13.1018	0.746306	0.10423	0.149463	Unclassified	0.746306	Subpopulation1
Ames23413	A286	19.8875	28.252	0.621616	0.245693	0.132691	Unclassified	0.621616	Admixed
Ames23414	A288	43.0609	35.07	0.564892	0.377352	0.057756	Unclassified	0.564892	Admixed
Ames23415	A295	50.7798	29.4215	0.587384	0.379949	0.032667	Unclassified	0.587384	Admixed
Ames23417	A305	41.2695	19.1032	0.53437	0.39618	0.06945	Unclassified	0.53437	Admixed
Ames23418	A308	34.4245	17.6537	0.507356	0.406642	0.086002	Unclassified	0.507356	Admixed
Ames23419	A310	35.3758	8.62035	0.697542	0.209954	0.092504	Unclassified	0.697542	Admixed
Ames23420	A312	33.7979	30.074	0.50717	0.403976	0.088853	Unclassified	0.50717	Admixed
Ames23421	A321	3.32432	0.649282	0.806474	1e-06	0.193525	Unclassified	0.806474	Subpopulation1
Ames23422	A322	29.6929	29.2185	0.574732	0.329346	0.095922	Unclassified	0.574732	Admixed
Ames23423	A334	33.0874	14.7046	0.600923	0.299185	0.099891	Unclassified	0.600923	Admixed
Ames23424	A340	47.3329	21.403	0.54353	0.402605	0.053866	Unclassified	0.54353	Admixed
Ames23425	A344	38.8712	25.2833	0.657709	0.272975	0.069316	Unclassified	0.657709	Admixed
Ames23426	A357	37.1041	7.59514	0.730544	0.181253	0.088202	Unclassified	0.730544	Subpopulation1
Ames23428	A375	8.33878	-1.7735	0.836733	0	0.163266	Unclassified	0.836733	Subpopulation1
Ames23429	A385	28.025	38.4348	0.577467	0.306153	0.11638	Unclassified	0.577467	Admixed
Ames23430	A401	27.6828	8.86097	0.655191	0.238428	0.106381	Unclassified	0.655191	Admixed
Ames23431	A407	39.7346	19.1335	0.543524	0.386334	0.070142	Unclassified	0.543524	Admixed
Ames23433	A422	27.1112	38.187	0.58168	0.298888	0.119432	Unclassified	0.58168	Admixed
Ames23434	A424	43.2837	1.65089	0.754787	0.199086	0.046127	Unclassified	0.754787	Subpopulation1
Ames23435	A427	29.1832	-3.91375	0.681364	0.213045	0.105591	Unclassified	0.681364	Admixed
Ames23436	A449	17.5814	5.26232	0.760296	0.091319	0.148384	Unclassified	0.760296	Subpopulation1
Ames23437	A450	34.9763	17.717	0.764894	0.1578	0.077306	Unclassified	0.764894	Subpopulation1
Ames23438	A451	34.7807	22.9086	0.708249	0.221533	0.070218	Unclassified	0.708249	Subpopulation1
Ames23439	A480	44.122	14.9949	0.69346	0.244667	0.061873	Unclassified	0.69346	Admixed
Ames23440	A495	38.6253	22.4038	0.636631	0.297562	0.065807	Unclassified	0.636631	Admixed
Ames23441	A497	49.2907	27.1369	0.64723	0.321237	0.031532	Unclassified	0.64723	Admixed
Ames23442	A498	49.2427	15.3034	0.665489	0.293372	0.041139	Unclassified	0.665489	Admixed
Ames23443	A499	49.9134	14.3245	0.663777	0.29414	0.042083	Unclassified	0.663777	Admixed
Ames23444	A500	42.4114	16.6356	0.713987	0.223306	0.062707	Unclassified	0.713987	Subpopulation1
Ames23445	A502	41.4056	24.2284	0.597291	0.337541	0.065168	Unclassified	0.597291	Admixed
Ames23446	A508	15.9437	17.8204	0.67855	0.180605	0.140845	Unclassified	0.67855	Admixed
Ames23448	A547	8.61913	5.97397	0.810233	0.005074	0.184694	Unclassified	0.810233	Subpopulation1
Ames23449	A548	10.5869	-6.30923	0.850923	1e-06	0.149077	Unclassified	0.850923	Subpopulation1
Ames23450	A556	36.3574	-2.78008	0.752688	0.173321	0.073991	Unclassified	0.752688	Subpopulation1
Ames23451	A572	31.3358	33.8814	0.501815	0.398156	0.100028	Unclassified	0.501815	Admixed
Ames23452	A575	31.8244	3.29503	0.629524	0.263824	0.106651	Unclassified	0.629524	Admixed
Ames23455	A588	27.5971	-16.2599	0.763382	0.143736	0.092882	Unclassified	0.763382	Subpopulation1
Ames23456	A617	20.8276	3.51683	0.749817	0.129897	0.120286	Unclassified	0.749817	Subpopulation1
Ames23457	A618	28.939	0.984666	0.80329	0.104186	0.092523	Unclassified	0.80329	Subpopulation1
Ames23458	A619HT	58.1288	-78.2306	0.999999	0	1e-06	Non-stiff stalk	0.999999	Subpopulation1
Ames23459	A622	27.1498	41.7404	0.364384	0.511657	0.123959	Unclassified	0.511657	Admixed
Ames23460	A624	48.172	25.4932	0.58156	0.385363	0.033077	Unclassified	0.58156	Admixed
Ames23461	A625	29.4336	1.42776	0.709257	0.191929	0.098814	Unclassified	0.709257	Subpopulation1
Ames23463	A627	14.1487	22.5688	0.560144	0.284452	0.155405	Unclassified	0.560144	Admixed
Ames23464	A628	37.7665	-0.876487	0.776494	0.160633	0.062873	Unclassified	0.776494	Subpopulation1
Ames23465	A629	27.7619	-11.4611	0.931903	1e-06	0.068096	Unclassified	0.931903	Subpopulation1
Ames23466	A630	32.6805	-19.0328	0.949917	1e-06	0.050082	Unclassified	0.949917	Subpopulation1
Ames23467	A631	25.4034	-7.23083	0.922552	0	0.077448	Unclassified	0.922552	Subpopulation1
Ames23468	A632HT	-159.029	44.3915	0.057674	1e-06	0.942326	Unclassified	0.942326	Subpopulation3
Ames23469	A632HTN	-154.365	44.1101	0.08833	0	0.911669	Stiff stalk	0.911669	Subpopulation3
Ames23470	A632RpRp	-157.307	45.8549	0.072097	1e-06	0.927902	Stiff stalk	0.927902	Subpopulation3
Ames23471	A633	-190.553	42.5799	0.071269	0	0.928731	Stiff stalk	0.928731	Subpopulation3
Ames23473	A635RpRp	-175.283	38.3478	0.083872	1e-06	0.916128	Stiff stalk	0.916128	Subpopulation3
Ames23474	A636	-182.222	38.901	0.09697	0	0.903029	Unclassified	0.903029	Subpopulation3
Ames23475	A637	19.6105	-0.254039	0.818231	0.058321	0.123448	Unclassified	0.818231	Subpopulation1
Ames23476	A638	26.738	6.68756	0.860246	0.045158	0.094596	Unclassified	0.860246	Subpopulation1
Ames23478	A643	39.2449	15.1465	0.580437	0.340104	0.079459	Unclassified	0.580437	Admixed
Ames23479	A644	21.6128	2.78398	0.667322	0.20174	0.130938	Unclassified	0.667322	Admixed
Ames23480	A645	35.432	-21.5935	0.933422	1e-06	0.066577	Unclassified	0.933422	Subpopulation1
Ames23481	A646	26.8344	-23.268	0.912829	1e-06	0.087171	Unclassified	0.912829	Subpopulation1
Ames23482	A649	17.8792	5.28459	0.766514	0.089534	0.143952	Unclassified	0.766514	Subpopulation1
Ames23483	A650	22.5211	6.51983	0.749437	0.120623	0.129939	Unclassified	0.749437	Subpopulation1
Ames23484	A651	44.0244	5.96866	0.743089	0.212827	0.044084	Unclassified	0.743089	Subpopulation1
Ames23485	A652	57.7706	20.711	0.710002	0.273632	0.016366	Stiff stalk	0.710002	Subpopulation1
Ames23486	A653	38.1984	18.1078	0.813819	0.115676	0.070505	Unclassified	0.813819	Subpopulation1
Ames23487	A655	30.6395	-2.34625	0.905811	0.004613	0.089576	Unclassified	0.905811	Subpopulation1
Ames23488	A656	-87.0327	25.616	0.410253	0.074301	0.515447	Unclassified	0.515447	Admixed
Ames23490	A666	23.9832	28.1603	0.587767	0.286193	0.12604	Unclassified	0.587767	Admixed
Ames23491	A667	26.1378	0.573065	0.668773	0.219459	0.111768	Stiff stalk	0.668773	Admixed
Ames23492	A668	60.2754	-77.1156	0.8262	0.161134	0.012666	Unclassified	0.8262	Subpopulation1
Ames23493	A669	-22.8373	-7.30308	0.741694	1e-06	0.258306	Unclassified	0.741694	Subpopulation1
Ames23494	A670	24.3783	-57.372	0.887278	1e-06	0.112722	Stiff stalk	0.887278	Subpopulation1
Ames23495	A671	44.0241	-46.1856	0.74261	0.199577	0.057814	Unclassified	0.74261	Subpopulation1
Ames23496	A672	-123.489	37.2078	0.224654	0.041236	0.734111	Unclassified	0.734111	Subpopulation3
Ames23497	A673	21.9545	11.6646	0.626759	0.264972	0.108269	Unclassified	0.626759	Admixed
Ames23498	A674	13.2117	23.2225	0.405719	0.436119	0.158162	Unclassified	0.436119	Admixed
Ames23499	A675	-107.874	-4.68933	0.309291	0.14381	0.546899	Unclassified	0.546899	Admixed
Ames23500	A676	60.8512	-71.4541	0.869407	0.118321	0.012272	Unclassified	0.869407	Subpopulation1
Ames23501	A677	58.0112	-15.498	0.873031	0.103521	0.023448	Unclassified	0.873031	Subpopulation1
Ames23502	A678	31.5048	-5.54208	0.73322	0.167676	0.099103	Unclassified	0.73322	Subpopulation1
Ames23503	A680	-290	-41.0417	0	0	0.999999	Stiff stalk	0.999999	Subpopulation3
Ames23504	A681	-238.313	-29.7943	0.052822	1e-06	0.947177	Stiff stalk	0.947177	Subpopulation3
Ames23505	A683	69.541	-192.516	0.99796	1e-06	0.002039	Unclassified	0.99796	Subpopulation1
Ames23922	Oh51A	25.0405	29.1206	0.565469	0.33347	0.101061	Unclassified	0.565469	Admixed
Ames23923	Tx61M	48.4181	53.6803	0.088238	0.862077	0.049685	Unclassified	0.862077	Subpopulation2
Ames23924	Tx706	49.6159	53.1205	0.106314	0.847234	0.046451	Unclassified	0.847234	Subpopulation2
Ames24585	CG10	40.2647	19.6789	0.580254	0.358454	0.061292	Unclassified	0.580254	Admixed
Ames24589	I159	-14.8271	-13.9695	0.691127	0.058451	0.250422	Unclassified	0.691127	Admixed
Ames24590	I198	0.67074	4.3613	0.694393	0.129209	0.176398	Unclassified	0.694393	Admixed
Ames24705	MS4	43.5654	51.5983	0.125698	0.80479	0.069512	Unclassified	0.80479	Subpopulation2
Ames24706	MS12	38.7994	13.6078	0.513466	0.41087	0.075665	Unclassified	0.513466	Admixed
Ames24707	MS24	43.9185	14.0463	0.543898	0.400273	0.055829	Unclassified	0.543898	Admixed
Ames24708	MS24A	33.3761	11.3839	0.56168	0.347962	0.090359	Unclassified	0.56168	Admixed
Ames24709	MS57	31.9958	-24.3474	0.853679	0.05977	0.086551	Non-stiff stalk	0.853679	Subpopulation1
Ames24710	MS67	39.7613	30.5912	0.437618	0.499085	0.063296	Unclassified	0.499085	Admixed
Ames24711	MS68	21.6284	-12.3264	0.832194	0.057527	0.11028	Non-stiff stalk	0.832194	Subpopulation1
Ames24712		31.3839	18.0049	0.798184	0.113595	0.088221	Unclassified	0.798184	Subpopulation1
Ames24713	MS72	24.3443	13.1901	0.60968	0.27816	0.11216	Unclassified	0.60968	Admixed
Ames24714	MS74	18.9731	27.5149	0.519232	0.341797	0.138971	Unclassified	0.519232	Admixed
Ames24715	MS75	-55.0268	7.35577	0.531465	0.0518	0.416735	Unclassified	0.531465	Admixed
Ames24716	MS76	-109.853	26.4871	0.360344	0	0.639655	Unclassified	0.639655	Admixed
Ames24717	MS77	-88.8937	19.1691	0.428119	0.007033	0.564848	Unclassified	0.564848	Admixed
Ames24718	MS78	57.075	-80.3561	0.999999	0	1e-06	Unclassified	0.999999	Subpopulation1
Ames24719	MS79	56.2147	-69.4419	0.999999	1e-06	1e-06	Unclassified	0.999999	Subpopulation1
Ames24720	MS80	28.2661	25.3506	0.643685	0.267666	0.088649	Unclassified	0.643685	Admixed
Ames24721	MS81	-10.3558	7.91583	0.645356	0.097937	0.256707	Unclassified	0.645356	Admixed
Ames24722	MS89	54.0913	-31.6979	0.919596	0.066612	0.013792	Unclassified	0.919596	Subpopulation1
Ames24723	MS91	45.1994	31.2731	0.427257	0.528927	0.043816	Unclassified	0.528927	Admixed
Ames24724	MS92	49.2948	-20.5652	0.858893	0.111497	0.02961	Unclassified	0.858893	Subpopulation1
Ames24725	MS93	56.9218	5.53783	0.611679	0.369043	0.019277	Unclassified	0.611679	Admixed
Ames24726		47.9765	0.0777678	0.757227	0.207496	0.035276	Unclassified	0.757227	Subpopulation1
Ames24727	MS106	21.2346	9.24612	0.737119	0.15132	0.111561	Unclassified	0.737119	Subpopulation1
Ames24728	MS107	28.5803	11.467	0.595751	0.301247	0.103003	Unclassified	0.595751	Admixed
Ames24729	MS116	24.7258	14.7189	0.524764	0.364752	0.110484	Unclassified	0.524764	Admixed
Ames24730	MS132	26.0248	-11.2601	0.7943	0.088052	0.117648	Stiff stalk	0.7943	Subpopulation1
Ames24732	MS141	40.2528	32.4675	0.532916	0.406161	0.060923	Unclassified	0.532916	Admixed
Ames24733	MS142	24.1647	11.638	0.639536	0.231746	0.128718	Unclassified	0.639536	Admixed
Ames24734	MS153	42.7321	2.84879	0.6741	0.271575	0.054324	Unclassified	0.6741	Admixed
Ames24735	MS198	47.1917	-48.1838	0.937522	0.033383	0.029095	Unclassified	0.937522	Subpopulation1
Ames24736	MS199	27.3189	7.90518	0.726849	0.177641	0.09551	Unclassified	0.726849	Subpopulation1
Ames24737	MS200	34.6315	13.5421	0.64804	0.269449	0.082511	Unclassified	0.64804	Admixed
Ames24738	MS201	53.8638	-28.1127	0.89468	0.083654	0.021667	Unclassified	0.89468	Subpopulation1
Ames24739	MS203	36.1104	1.71493	0.794988	0.123221	0.08179	Unclassified	0.794988	Subpopulation1
Ames24740	MS204	17.0481	10.4806	0.780205	0.097769	0.122026	Unclassified	0.780205	Subpopulation1
Ames24741	MS206	37.0502	20.1169	0.506203	0.416854	0.076942	Unclassified	0.506203	Admixed
Ames24742	MS211	23.6297	16.8829	0.565691	0.308873	0.125436	Unclassified	0.565691	Admixed
Ames24743	MS214	26.037	7.79476	0.72453	0.175807	0.099664	Stiff stalk	0.72453	Subpopulation1
Ames24744	MS215	21.4249	17.3554	0.627616	0.245753	0.126631	Unclassified	0.627616	Admixed
Ames24745	MS216	27.8494	7.51575	0.728511	0.177891	0.093598	Unclassified	0.728511	Subpopulation1
Ames24746	MS221	-104.352	3.30486	0.388749	1e-06	0.611251	Non-stiff stalk	0.611251	Admixed
Ames24747	MS222	-101.42	3.42872	0.399418	1e-06	0.600581	Non-stiff stalk	0.600581	Admixed
Ames24748	MS223	28.7765	12.2859	0.738029	0.166642	0.095329	Non-stiff stalk	0.738029	Subpopulation1
Ames24749	MS224	18.4564	-11.1152	0.848318	0.023003	0.128679	Non-stiff stalk	0.848318	Subpopulation1
Ames24750	MS225	28.6535	-27.3085	0.855672	0.056713	0.087615	Non-stiff stalk	0.855672	Subpopulation1
Ames24751	MS226	-26.3235	9.59322	0.504203	0.148554	0.347243	Unclassified	0.504203	Admixed
Ames24752	MS1334	43.4095	13.0937	0.509864	0.435032	0.055104	Unclassified	0.509864	Admixed
Ames24989	Va99	13.6511	-4.77326	0.848492	1e-06	0.151508	Non-stiff stalk	0.848492	Subpopulation1
Ames25179	SeparationfromSC84E	33.786	32.7631	0.370733	0.535681	0.093586	Unclassified	0.535681	Admixed
Ames25218	GA221	38.2252	32.639	0.384902	0.550783	0.064314	Unclassified	0.550783	Admixed
Ames25219	A619Ht1	58.9111	-77.7524	0.999999	1e-06	1e-06	Non-stiff stalk	0.999999	Subpopulation1
Ames25220	A619Ht2	58.4349	-78.4102	0.999999	1e-06	1e-06	Non-stiff stalk	0.999999	Subpopulation1
Ames25221	A619Ht3	59.0747	-78.1628	0.999999	1e-06	0	Non-stiff stalk	0.999999	Subpopulation1
Ames2523	38-11RPARENTHB19INB	9.42278	4.44753	0.689654	0.155075	0.155271	Stiff stalk	0.689654	Admixed
Ames25372	Pa91HT1	49.1893	-27.6275	0.987301	1e-06	0.012698	Stiff stalk	0.987301	Subpopulation1
Ames25373	Pa91HT2	50.1365	-31.1085	0.985609	1e-06	0.01439	Unclassified	0.985609	Subpopulation1
Ames25374	Pa91HT3	46.3092	-24.1621	0.950612	0.024124	0.025264	Stiff stalk	0.950612	Subpopulation1
Ames25559	H60	38.8349	49.2594	0.353295	0.571844	0.07486	Unclassified	0.571844	Admixed
Ames26021	P8	-4.64301	6.99495	0.619036	0.170347	0.210617	Unclassified	0.619036	Admixed
Ames26022	Tr	2.3276	4.88681	0.712287	0.090635	0.197078	Unclassified	0.712287	Subpopulation1
Ames26028	CI540	-12.3156	26.4581	0.494737	0.239138	0.266125	Unclassified	0.494737	Admixed
Ames26114	CI1	8.22443	1.35737	0.602293	0.22155	0.176157	Unclassified	0.602293	Admixed
Ames26115	CI2	27.6755	-33.7297	0.812852	0.097961	0.089187	Unclassified	0.812852	Subpopulation1
Ames26116	CI3A	21.228	17.4758	0.531566	0.320961	0.147473	Unclassified	0.531566	Admixed
Ames26117	CI7A	27.922	14.5973	0.535453	0.365697	0.09885	Unclassified	0.535453	Admixed
Ames26118	CI11B	36.9683	29.5784	0.493905	0.423511	0.082584	Unclassified	0.493905	Admixed
Ames26119	CI19	42.4714	10.256	0.598184	0.335291	0.066526	Unclassified	0.598184	Admixed
Ames26120	CI20	31.2737	9.71189	0.651116	0.243961	0.104923	Unclassified	0.651116	Admixed
Ames26121	CI28	37.8228	13.4105	0.543019	0.392689	0.064292	Unclassified	0.543019	Admixed
Ames26122	CI28B	37.0612	14.4259	0.536001	0.399519	0.06448	Unclassified	0.536001	Admixed
Ames26123	CI28C	35.7895	26.8285	0.399761	0.52426	0.075979	Unclassified	0.52426	Admixed
Ames26124	CI30	32.0787	10.0543	0.648314	0.237542	0.114144	Unclassified	0.648314	Admixed
Ames26125	CI31	36.1407	18.2248	0.54039	0.375594	0.084016	Unclassified	0.54039	Admixed
Ames26126	CI32	35.3542	21.8478	0.495379	0.437213	0.067408	Unclassified	0.495379	Admixed
Ames26127	CI34	50.1507	7.40245	0.602871	0.365595	0.031534	Unclassified	0.602871	Admixed
Ames26128	CI40H	26.5629	15.5058	0.745976	0.129803	0.124221	Unclassified	0.745976	Subpopulation1
Ames26129	CI41	29.1626	30.6696	0.372236	0.533492	0.094271	Unclassified	0.533492	Admixed
Ames26130	CI46	27.3278	24.5107	0.46059	0.421966	0.117444	Unclassified	0.46059	Admixed
Ames26131	CI70	28.357	24.9072	0.461419	0.425363	0.113217	Unclassified	0.461419	Admixed
Ames26132	CI72	28.1336	18.1179	0.554975	0.346396	0.098629	Unclassified	0.554975	Admixed
Ames26133	CI74	53.7474	35.2149	0.203887	0.763396	0.032717	Unclassified	0.763396	Subpopulation2
Ames26134	CI75	15.4617	3.67373	0.699791	0.158153	0.142056	Unclassified	0.699791	Admixed
Ames26135	CI82B	40.8844	14.4887	0.574321	0.360023	0.065656	Unclassified	0.574321	Admixed
Ames26136	CI84B	41.6127	0.207602	0.676741	0.249477	0.073782	Unclassified	0.676741	Admixed
Ames26137	CI91C	60.0726	29.7987	0.443018	0.548562	0.00842	Unclassified	0.548562	Admixed
Ames26138	CI187-2	22.628	-128.198	0.897509	1e-06	0.10249	Stiff stalk	0.897509	Subpopulation1
Ames26439	GEMN-0034	51.202	-28.044	0.612554	0.361915	0.025531	Unclassified	0.612554	Admixed
Ames26443	GEMN-0038	39.6742	-28.0112	0.552872	0.388193	0.058934	Unclassified	0.552872	Admixed
Ames26484	GEMS-0008	-175.15	-21.6153	1e-06	0.214312	0.785688	Unclassified	0.785688	Subpopulation3
Ames26501	GEMS-0026	-17.8148	39.4274	0.143744	0.584448	0.271808	Unclassified	0.584448	Admixed
Ames26511	GEMS-0007	-95.2665	26.0186	1e-06	0.520468	0.479532	Unclassified	0.520468	Admixed
Ames26604	38-11	15.3422	4.96414	0.8676	1e-06	0.1324	Unclassified	0.8676	Subpopulation1
Ames26741	WX187-2	26.9991	-80.2209	0.884423	0.011771	0.103805	Unclassified	0.884423	Subpopulation1
Ames26742	WX33-16	34.6615	21.2982	0.477669	0.440658	0.081673	Stiff stalk	0.477669	Admixed
Ames26743	WX38-11	24.8401	17.5771	0.797628	0.096862	0.105509	Stiff stalk	0.797628	Subpopulation1
Ames26744	WXB14	-213.124	43.8065	0	0	0.999999	Stiff stalk	0.999999	Subpopulation3
Ames26745	WXB6	-4.42713	16.315	0.712575	0.094168	0.193257	Unclassified	0.712575	Subpopulation1
Ames26746	WXHy	-28.6998	1.03707	0.729692	1e-06	0.270307	Unclassified	0.729692	Subpopulation1
Ames26747	WXI198	-5.39536	11.135	0.648962	0.146971	0.204067	Non-stiff stalk	0.648962	Admixed
Ames26748	WXI205	-18.914	-2.18335	0.751311	0.006239	0.242449	Non-stiff stalk	0.751311	Subpopulation1
Ames26749	WXK41	31.1738	34.317	0.490325	0.427093	0.082582	Unclassified	0.490325	Admixed
Ames26750	WXK44	43.072	13.0551	0.571268	0.369488	0.059244	Unclassified	0.571268	Admixed
Ames26751	WXK55	44.3459	22.7811	0.474186	0.473022	0.052792	Unclassified	0.474186	Admixed
Ames26752	WXK64	35.8226	22.343	0.374476	0.549793	0.075731	Unclassified	0.549793	Admixed
Ames26753	WXL289	38.676	1.90395	0.612957	0.321041	0.066002	Non-stiff stalk	0.612957	Admixed
Ames26754	WXL317	41.3375	27.7441	0.534768	0.409466	0.055767	Non-stiff stalk	0.534768	Admixed
Ames26755	WXM14	27.0549	19.0624	0.796728	0.101297	0.101975	Unclassified	0.796728	Subpopulation1
Ames26756	WXOs420	26.248	22.7454	0.756726	0.136046	0.107228	Stiff stalk	0.756726	Subpopulation1
Ames26757	WXW22	16.4542	2.72981	0.851179	1e-06	0.148821	Non-stiff stalk	0.851179	Subpopulation1
Ames26758	WXWF9	31.4303	-3.86303	0.941754	0	0.058245	Stiff stalk	0.941754	Subpopulation1
Ames26769	B2	29.178	0.166106	0.770608	0.13499	0.094402	Unclassified	0.770608	Subpopulation1
Ames26770	66	-0.635949	24.274	0.596083	0.202273	0.201644	Unclassified	0.596083	Admixed
Ames26771	33-16	41.9269	20.7397	0.527959	0.409123	0.062918	Unclassified	0.527959	Admixed
Ames26772	H5	15.2151	0.250757	0.845868	1e-06	0.154132	Unclassified	0.845868	Subpopulation1
Ames26773	H10	1.73621	-37.8274	0.754018	0.032774	0.213208	Unclassified	0.754018	Subpopulation1
Ames26774	H14	49.6239	-13.4589	0.723394	0.245961	0.030645	Unclassified	0.723394	Subpopulation1
Ames26775	H19	12.6471	12.889	0.567316	0.260916	0.171768	Unclassified	0.567316	Admixed
Ames26776	H22w	35.0597	26.1157	0.471043	0.442211	0.086746	Non-stiff stalk	0.471043	Admixed
Ames26777	H23w	42.1011	20.2831	0.512967	0.424403	0.06263	Unclassified	0.512967	Admixed
Ames26778	H26w	18.5254	18.0664	0.685837	0.193091	0.121072	Unclassified	0.685837	Admixed
Ames26779	H27w	15.8119	18.4149	0.594259	0.264365	0.141376	Unclassified	0.594259	Admixed
Ames26780	H28w	-14.524	3.73055	0.629845	0.136876	0.233279	Unclassified	0.629845	Admixed
Ames26781	H29w	-14.3896	3.60513	0.627814	0.140264	0.231922	Unclassified	0.627814	Admixed
Ames26782	H30w	23.3378	3.66342	0.794064	0.094686	0.11125	Unclassified	0.794064	Subpopulation1
Ames26783	H41	11.4123	8.85019	0.793906	0.059352	0.146743	Unclassified	0.793906	Subpopulation1
Ames26784	H42	21.213	-13.4491	0.880212	0.005892	0.113896	Unclassified	0.880212	Subpopulation1
Ames26785	H45	24.4204	-16.8445	0.920466	1e-06	0.079534	Stiff stalk	0.920466	Subpopulation1
Ames26786	H46	25.4826	-3.63811	0.921324	1e-06	0.078675	Stiff stalk	0.921324	Subpopulation1
Ames26787	H49	28.246	3.28491	0.879066	0.034232	0.086702	Unclassified	0.879066	Subpopulation1
Ames26788	H50	28.2735	17.1977	0.662039	0.246865	0.091095	Unclassified	0.662039	Admixed
Ames26789	H51	35.5406	37.9336	0.445106	0.478714	0.07618	Unclassified	0.478714	Admixed
Ames26790	H52	24.082	2.99575	0.66863	0.218692	0.112678	Unclassified	0.66863	Admixed
Ames26791	H55	-17.8684	23.3511	0.608125	0.145051	0.246824	Unclassified	0.608125	Admixed
Ames26792	H59	34.8983	31.7956	0.362377	0.549539	0.088084	Unclassified	0.549539	Admixed
Ames26793	H71	22.8616	2.9015	0.825098	0.062084	0.112818	Unclassified	0.825098	Subpopulation1
Ames26794	H73	35.7645	17.3308	0.524319	0.399341	0.07634	Unclassified	0.524319	Admixed
Ames26795	H88	51.014	-42.8041	0.894834	0.083863	0.021303	Unclassified	0.894834	Subpopulation1
Ames26796	H93	-56.9721	-0.303386	0.518643	0.000133	0.481224	Unclassified	0.518643	Admixed
Ames26797	H96	-15.9324	18.9248	0.562041	0.198599	0.239361	Unclassified	0.562041	Admixed
Ames26798	H98	18.4957	-58.3978	0.914836	1e-06	0.085164	Unclassified	0.914836	Subpopulation1
Ames26799	H101	44.3766	25.6082	0.550744	0.405326	0.04393	Unclassified	0.550744	Admixed
Ames26800	H106w	-50.8661	2.44063	0.427994	0.157411	0.414595	Unclassified	0.427994	Admixed
Ames26801	H108	81.3215	-207.329	0.999999	1e-06	1e-06	Non-stiff stalk	0.999999	Subpopulation1
Ames26802	H109	87.2187	-230.79	0.999999	0	1e-06	Non-stiff stalk	0.999999	Subpopulation1
Ames26803	H113	2.19613	42.2041	0.421348	0.382062	0.19659	Unclassified	0.421348	Admixed
Ames26804	H121	35.3611	4.5801	0.666925	0.247377	0.085698	Unclassified	0.666925	Admixed
Ames26805	H122w	-131.795	-32.7719	0.301761	0.105263	0.592976	Unclassified	0.592976	Admixed
Ames26806	H124w	42.285	14.4787	0.512416	0.423414	0.064171	Unclassified	0.512416	Admixed
Ames26808	Ill.Hy	-29.2786	1.21735	0.728086	1e-06	0.271914	Stiff stalk	0.728086	Subpopulation1
Ames26909	Mo41	72.1216	-209.303	0.987012	1e-06	0.012987	Unclassified	0.987012	Subpopulation1
Ames27017	CH705-8	19.1614	11.3932	0.7465	0.13231	0.12119	Unclassified	0.7465	Subpopulation1
Ames27018	CH711-10	63.2584	-109.211	0.992148	1e-06	0.007852	Unclassified	0.992148	Subpopulation1
Ames27019	CH732-12	-99.8626	29.5668	0.323001	0.10591	0.571089	Unclassified	0.571089	Admixed
Ames27020	CH741-6	-105.847	29.8719	0.398349	1e-06	0.601651	Unclassified	0.601651	Admixed
Ames27021	CH753-4	-157.333	34.5989	0.165812	1e-06	0.834187	Unclassified	0.834187	Subpopulation3
Ames27024	CL17	37.9925	24.2901	0.532438	0.391545	0.076017	Unclassified	0.532438	Admixed
Ames27025	CL18	35.8929	24.4135	0.528941	0.389306	0.081753	Unclassified	0.528941	Admixed
Ames27026	CL19	22.0449	29.4317	0.419652	0.44983	0.130518	Unclassified	0.44983	Admixed
Ames27028	CL22	61.21	13.1124	0.481496	0.500279	0.018225	Unclassified	0.500279	Admixed
Ames27029	CL27	32.3238	28.504	0.404845	0.503433	0.091721	Unclassified	0.503433	Admixed
Ames27031	CM99	-113.12	37.9325	0.331587	1e-06	0.668412	Unclassified	0.668412	Admixed
Ames27032	CM145	13.9881	25.4371	0.682225	0.156744	0.161031	Unclassified	0.682225	Admixed
Ames27034	CM155	-95.5731	38.0434	0.445427	1.8e-05	0.554555	Unclassified	0.554555	Admixed
Ames27036	CM182	35.154	19.5674	0.593787	0.308036	0.098177	Unclassified	0.593787	Admixed
Ames27037	CM234	47.4108	8.29812	0.565994	0.382275	0.051731	Unclassified	0.565994	Admixed
Ames27038	CMV3	32.0177	28.4508	0.654441	0.257464	0.088095	Unclassified	0.654441	Admixed
Ames27039	CO117	28.6318	14.8435	0.67996	0.227446	0.092594	Unclassified	0.67996	Admixed
Ames27040	CO120	25.6842	-1.79916	0.639996	0.234013	0.125991	Unclassified	0.639996	Admixed
Ames27041	CO150	14.7294	15.9874	0.673243	0.188329	0.138428	Unclassified	0.673243	Admixed
Ames27042	CO158	24.364	-1.55711	0.635006	0.23532	0.129674	Unclassified	0.635006	Admixed
Ames27043	CO192	29.2644	33.5299	0.503858	0.393339	0.102803	Unclassified	0.503858	Admixed
Ames27044	CO216	42.9373	6.92215	0.620508	0.321571	0.057921	Unclassified	0.620508	Admixed
Ames27045	CO220	-159.396	40.3393	0.070241	1e-06	0.929758	Unclassified	0.929758	Subpopulation3
Ames27047	CO237	16.8566	21.4951	0.484651	0.375511	0.139838	Unclassified	0.484651	Admixed
Ames27048	CO245	38.2239	23.2181	0.45728	0.471489	0.071231	Unclassified	0.471489	Admixed
Ames27049	CO252	41.495	13.3302	0.565283	0.374442	0.060275	Unclassified	0.565283	Admixed
Ames27050		39.1714	32.1839	0.41721	0.516009	0.066781	Unclassified	0.516009	Admixed
Ames27051	CO256	-23.1297	-10.9032	0.715033	1e-06	0.284966	Stiff stalk	0.715033	Subpopulation1
Ames27052	CO257	-63.1022	-13.2019	0.571808	1e-06	0.428192	Stiff stalk	0.571808	Admixed
Ames27053	CO258	-66.7998	-1.6965	0.570088	1e-06	0.429912	Stiff stalk	0.570088	Admixed
Ames27056	CSJ2	47.2761	13.2907	0.526524	0.435333	0.038144	Unclassified	0.526524	Admixed
Ames27057	CSJ3	37.4152	13.8158	0.675488	0.253411	0.071101	Unclassified	0.675488	Admixed
Ames27062	A6	55.5121	74.9796	1e-06	0.999999	1e-06	Unclassified	0.999999	Subpopulation2
Ames27065	B73Htrhm	-304.589	-43.7191	0	0	0.999999	Stiff stalk	0.999999	Subpopulation3
Ames27066	B164	12.9184	25.2697	0.694228	0.145328	0.160444	Stiff stalk	0.694228	Admixed
Ames27069	CH701-30	22.3912	15.5033	0.703627	0.179456	0.116917	Unclassified	0.703627	Subpopulation1
Ames27070	CM7	36.8814	28.3603	0.459881	0.468027	0.072092	Unclassified	0.468027	Admixed
Ames27079	CML91	37.7673	55.3655	0.064477	0.855031	0.080492	Tropical	0.855031	Subpopulation2
Ames27080	CML92	39.4528	59.9988	0.067795	0.859727	0.072479	Tropical	0.859727	Subpopulation2
Ames27081	CML103	44.9393	62.3635	1e-06	0.927343	0.072657	Tropical	0.927343	Subpopulation2
Ames27082	CML108	48.9166	53.7586	0.121651	0.834613	0.043736	Tropical	0.834613	Subpopulation2
Ames27083	CML154Q	59.1829	71.0857	0.000345	0.993602	0.006053	Tropical	0.993602	Subpopulation2
Ames27084	CML157Q	56.6747	75.0972	1e-06	0.999999	1e-06	Tropical	0.999999	Subpopulation2
Ames27085	CML158Q	51.5029	70.0441	1e-06	0.970828	0.029171	Tropical	0.970828	Subpopulation2
Ames27086	CML218	56.5949	75.425	1e-06	0.997645	0.002355	Tropical	0.997645	Subpopulation2
Ames27087	CML220	60.6657	67.0927	0.018773	0.969805	0.011421	Tropical	0.969805	Subpopulation2
Ames27089	CML238	67.8602	66.4371	0.019715	0.980284	1e-06	Tropical	0.980284	Subpopulation2
Ames27093	CML311	63.2778	65.6739	0.071043	0.928956	1e-06	Tropical	0.928956	Subpopulation2
Ames27096	CML322	50.364	78.9518	1e-06	0.954672	0.045328	Tropical	0.954672	Subpopulation2
Ames27097	CML323	48.4164	57.4803	0.066978	0.884103	0.048919	Tropical	0.884103	Subpopulation2
Ames27098	CML328	61.3417	69.7822	1e-06	0.993091	0.006908	Tropical	0.993091	Subpopulation2
Ames27101	CO255	54.28	68.5673	1e-06	0.978096	0.021903	Tropical	0.978096	Subpopulation2
Ames27104		32.1965	28.1448	0.655737	0.256864	0.087399	Unclassified	0.655737	Admixed
Ames27105	CO106	28.3157	5.29766	0.627621	0.257563	0.114816	Unclassified	0.627621	Admixed
Ames27106	f7	36.8133	17.3115	0.595872	0.33139	0.072738	Unclassified	0.595872	Admixed
Ames27107		45.8158	46.9316	0.307568	0.649992	0.04244	Unclassified	0.649992	Admixed
Ames27110	E2558W	42.4383	31.3454	0.384242	0.565692	0.050067	Unclassified	0.565692	Admixed
Ames27111	EP1	57.3796	55.7097	0.181706	0.803862	0.014432	Unclassified	0.803862	Subpopulation2
Ames27112	F2834T	39.7627	55.6741	0.134434	0.79448	0.071086	Unclassified	0.79448	Subpopulation2
Ames27114	H91	-192.776	41.8693	1e-06	0	0.999999	Unclassified	0.999999	Subpopulation3
Ames27116	I137TN	47.4701	53.1226	0.198979	0.74195	0.059071	Unclassified	0.74195	Subpopulation2
Ames27121	K64	32.7799	22.8967	0.370595	0.545619	0.083786	Unclassified	0.545619	Admixed
Ames27122	K148	32.2488	15.1719	0.538256	0.363469	0.098274	Unclassified	0.538256	Admixed
Ames27125	Ki21	75.0574	-48.5671	0.345869	0.65413	1e-06	Tropical	0.65413	Admixed
Ames27126	Ki43	55.6933	67.9803	1e-06	0.993676	0.006324	Tropical	0.993676	Subpopulation2
Ames27130	Ky21	18.2555	31.2812	0.374656	0.481412	0.143932	Unclassified	0.481412	Admixed
Ames27131	Ky226	23.1266	8.96424	0.422197	0.459768	0.118035	Unclassified	0.459768	Admixed
Ames27132	L578	52.7287	30.9757	0.204615	0.764858	0.030527	Unclassified	0.764858	Subpopulation2
Ames27133	M37W	56.626	54.8203	0.069394	0.913227	0.017379	Unclassified	0.913227	Subpopulation2
Ames27134	M162W	60.4702	28.6862	0.292673	0.698376	0.00895	Unclassified	0.698376	Admixed
Ames27136		31.9161	32.7451	0.497843	0.415325	0.086832	Unclassified	0.497843	Admixed
Ames27137	N6	29.0972	20.9118	0.621515	0.28537	0.093116	Unclassified	0.621515	Admixed
Ames27138	N28Ht	-26.8417	1.35542	0.563721	0.116955	0.319324	Stiff stalk	0.563721	Admixed
Ames27140	NC260	40.1828	-31.0163	0.674717	0.263449	0.061835	Non-stiff stalk	0.674717	Admixed
Ames27141	NC290A	56.5922	-87.2651	0.841109	0.125554	0.033338	Unclassified	0.841109	Subpopulation1
Ames27142	NC292	-286.521	-38.6122	0	0	0.999999	Stiff stalk	0.999999	Subpopulation3
Ames27143	NC294	-175.035	-25.9594	0.068344	0.089756	0.8419	Unclassified	0.8419	Subpopulation3
Ames27144	NC296	72.0566	73.7933	1e-06	0.999999	1e-06	Unclassified	0.999999	Subpopulation2
Ames27145	NC296A	70.1014	72.7293	1e-06	0.999999	0	Unclassified	0.999999	Subpopulation2
Ames27147	NC302	62.2033	73.7105	1e-06	0.999999	1e-06	Unclassified	0.999999	Subpopulation2
Ames27148	NC304	71.2013	63.8457	1e-06	0.999999	1e-06	Unclassified	0.999999	Subpopulation2
Ames27149	NC306	-179.914	-18.564	0.030696	0.133803	0.835501	Unclassified	0.835501	Subpopulation3
Ames27150	NC308	-196.588	-11.1155	0.000808	0.112238	0.886954	Unclassified	0.886954	Subpopulation3
Ames27151	NC310	-227.521	-26.8917	0.094209	1e-06	0.905791	Unclassified	0.905791	Subpopulation3
Ames27152	NC312	-168.248	-14.128	0.029486	0.178976	0.791537	Unclassified	0.791537	Subpopulation3
Ames27153	NC314	-124.534	-7.53282	0.196762	0.138281	0.664956	Unclassified	0.664956	Admixed
Ames27154	NC316	-268.74	-38.1904	0	0	0.999999	Unclassified	0.999999	Subpopulation3
Ames27155	NC318	32.4406	47.3706	0.143567	0.755836	0.100597	Unclassified	0.755836	Subpopulation2
Ames27156	NC320	36.4719	43.7754	0.136913	0.771871	0.091216	Unclassified	0.771871	Subpopulation2
Ames27157	NC322	43.5388	46.4877	0.166492	0.774492	0.059016	Unclassified	0.774492	Subpopulation2
Ames27158	NC324	-97.764	-2.18068	0.193549	0.221182	0.585268	Unclassified	0.585268	Admixed
Ames27159	NC326	-288.955	-30.5403	0	0	0.999999	Unclassified	0.999999	Subpopulation3
Ames27160	NC328	-242.481	-40.1618	0.043901	1e-06	0.956098	Stiff stalk	0.956098	Subpopulation3
Ames27161	NC330	-282.772	-37.3762	0	0	0.999999	Stiff stalk	0.999999	Subpopulation3
Ames27162	NC332	44.4386	46.0308	0.175396	0.767975	0.056629	Unclassified	0.767975	Subpopulation2
Ames27163	NC334	43.5989	44.8305	0.176066	0.764777	0.059156	Unclassified	0.764777	Subpopulation2
Ames27164	NC336	61.1681	70.3489	1e-06	0.999999	1e-06	Unclassified	0.999999	Subpopulation2
Ames27165	NC338	62.0888	69.4692	1e-06	0.999999	1e-06	Unclassified	0.999999	Subpopulation2
Ames27166	NC340	57.1144	58.8417	0.000176	0.979325	0.020499	Unclassified	0.979325	Subpopulation2
Ames27167	NC342	51.8691	-105.17	0.897467	0.070643	0.03189	Unclassified	0.897467	Subpopulation1
Ames27168	NC344	53.5934	-103.034	0.9138	0.058102	0.028098	Unclassified	0.9138	Subpopulation1
Ames27169	NC346	72.5006	73.3947	1e-06	0.999999	0	Unclassified	0.999999	Subpopulation2
Ames27170	NC348	60.6403	70.7391	1e-06	0.999999	1e-06	Unclassified	0.999999	Subpopulation2
Ames27172	NC352	63.5739	73.8602	1e-06	0.999999	1e-06	Unclassified	0.999999	Subpopulation2
Ames27173	NC354	61.2623	68.9646	1e-06	0.999999	1e-06	Unclassified	0.999999	Subpopulation2
Ames27174	NC356	71.0721	59.4322	0.001061	0.998939	1e-06	Unclassified	0.998939	Subpopulation2
Ames27175	NC358	68.7161	66.8959	1e-06	0.999999	1e-06	Unclassified	0.999999	Subpopulation2
Ames27176	NC360	69.5868	-30.8065	0.46312	0.536879	1e-06	Unclassified	0.536879	Admixed
Ames27177	NC362	67.3296	-30.0081	0.531584	0.468415	1e-06	Unclassified	0.531584	Admixed
Ames27179	NC366	51.3986	28.6554	0.243572	0.726716	0.029712	Unclassified	0.726716	Subpopulation2
Ames27180	NC368	-168.282	-12.8422	0.005597	0.190311	0.804092	Unclassified	0.804092	Subpopulation3
Ames27181	NC370	37.0541	44.0214	0.142389	0.768863	0.088749	Unclassified	0.768863	Subpopulation2
Ames27182	NC372	-301.641	-43.383	0	0	0.999999	Unclassified	0.999999	Subpopulation3
Ames27183	Oh43E	59.8757	-80.2232	0.999999	0	0	Non-stiff stalk	0.999999	Subpopulation1
Ames27184	Pa762	60.8326	-60.1238	0.999999	0	1e-06	Non-stiff stalk	0.999999	Subpopulation1
Ames27185	Pa875	37.0653	14.3535	0.521459	0.414979	0.063562	Stiff stalk	0.521459	Admixed
Ames27187	R4	15.4253	-16.2146	0.87577	1e-06	0.12423	Unclassified	0.87577	Subpopulation1
Ames27189	SC55	49.9487	43.5925	0.226444	0.737056	0.0365	Unclassified	0.737056	Subpopulation2
Ames27190	T234	31.0883	26.6045	0.52778	0.381847	0.090373	Unclassified	0.52778	Admixed
Ames27191	U267Y	45.9525	35.3672	0.364936	0.583411	0.051654	Unclassified	0.583411	Admixed
Ames27192	Va14	41.0108	-10.8149	0.737236	0.208751	0.054013	Unclassified	0.737236	Subpopulation1
Ames27194	W401	30.587	5.93392	0.734548	0.169277	0.096175	Unclassified	0.734548	Subpopulation1
Ames27196	Yu796_NS	36.0594	-40.4239	0.631857	0.290381	0.077762	Unclassified	0.631857	Admixed
Ames27197	GEMN-0044	37.2384	23.8658	0.557689	0.373221	0.06909	Non-stiff stalk	0.557689	Admixed
Ames27198	GEMN-0045	31.4793	23.3855	0.435113	0.468265	0.096622	Non-stiff stalk	0.468265	Admixed
Ames27199	GEMN-0046	54.1973	0.486148	0.558201	0.416681	0.025118	Non-stiff stalk	0.558201	Admixed
Ames27200	GEMN-0047	48.9763	-62.5648	0.786665	0.177245	0.036091	Non-stiff stalk	0.786665	Subpopulation1
Ames27201	GEMN-0048	57.3583	-54.7146	0.707344	0.28293	0.009726	Non-stiff stalk	0.707344	Subpopulation1
Ames27202	GEMS-0049	-170.964	13.368	0.031671	0.17129	0.797039	Stiff stalk	0.797039	Subpopulation3
Ames27203	GEMS-0050	-160.63	17.0578	0.042133	0.182519	0.775348	Stiff stalk	0.775348	Subpopulation3
Ames27204	GEMS-0051	-136.58	-3.01221	0.183854	0.147757	0.66839	Stiff stalk	0.66839	Admixed
Ames27205	GEMS-0052	-198.479	-2.99156	1e-06	0.163151	0.836849	Stiff stalk	0.836849	Subpopulation3
Ames27206	GEMS-0053	-207.519	-23.2473	1e-06	0.142654	0.857345	Stiff stalk	0.857345	Subpopulation3
Ames27207	GEMS-0054	-60.4834	21.3321	0.09701	0.509765	0.393226	Stiff stalk	0.509765	Admixed
Ames27208	GEMS-0055	-176.109	-13.1104	0.040163	0.206272	0.753565	Stiff stalk	0.753565	Subpopulation3
Ames27209	GEMN-0056	79.0238	-167.247	0.829196	0.170803	1e-06	Non-stiff stalk	0.829196	Subpopulation1
Ames27210	GEMN-0057	73.0883	-165.997	0.999999	1e-06	1e-06	Non-stiff stalk	0.999999	Subpopulation1
Ames27211	GEMN-0058	67.3932	-117.733	0.838068	0.159244	0.002688	Non-stiff stalk	0.838068	Subpopulation1
Ames27212	GEMN-0059	41.9668	-89.5807	0.917638	0.014149	0.068213	Non-stiff stalk	0.917638	Subpopulation1
Ames27213	GEMN-0060	43.5915	-39.3771	0.817155	0.136703	0.046142	Non-stiff stalk	0.817155	Subpopulation1
Ames27214	GEMS-0061	-52.6779	-10.4219	0.20229	0.424163	0.373547	Stiff stalk	0.424163	Admixed
Ames27215	GEMS-0062	-107.599	8.01955	0.092325	0.361971	0.545705	Stiff stalk	0.545705	Admixed
Ames27216	GEMS-0063	-228.682	-25.1784	1e-06	0.069938	0.930062	Stiff stalk	0.930062	Subpopulation3
Ames27217	GEMS-0064	-221.005	-16.3098	0	0.090129	0.909871	Stiff stalk	0.909871	Subpopulation3
Ames27218	GEMS-0065	-177.543	-26.7944	0.176522	0.040419	0.783059	Stiff stalk	0.783059	Subpopulation3
Ames27219	GEMS-0066	-192.702	-17.1253	0.100667	0.087123	0.81221	Stiff stalk	0.81221	Subpopulation3
Ames27258	CML11	62.3392	65.5991	1e-06	0.984447	0.015553	Tropical	0.984447	Subpopulation2
Ames27261	NC298	62.7081	73.6549	1e-06	0.999999	1e-06	Unclassified	0.999999	Subpopulation2
Ames27450	LH143Maintainer	-159.963	39.8509	0.069146	0	0.930854	Stiff stalk	0.930854	Subpopulation3
Ames27451	A632.75A1A2C1R1-rB1Pl1	-144.642	42.2027	0.1417	1e-06	0.8583	Stiff stalk	0.8583	Subpopulation3
Ames28170	A619E	52.8456	-65.0638	0.997352	1e-06	0.002648	Non-stiff stalk	0.997352	Subpopulation1
Ames28185	CML77	49.3318	55.7943	0.063863	0.884394	0.051744	Tropical	0.884394	Subpopulation2
Ames28290	C49	13.2614	21.0523	0.62132	0.237882	0.140797	Unclassified	0.62132	Admixed
Ames28291	Hi27Goodman-Buckler	-10.9104	71.2614	1e-06	0.736065	0.263935	Unclassified	0.736065	Subpopulation2
Ames28361	Mo402	26.675	-25.4984	0.933561	1e-06	0.066438	Unclassified	0.933561	Subpopulation1
Ames28362	Mo403	6.44742	-2.52489	0.821788	0.004841	0.173372	Unclassified	0.821788	Subpopulation1
Ames28365	CI91BGoodman-Buckler	20.3907	-108.165	0.888409	0	0.111591	Unclassified	0.888409	Subpopulation1
Ames28366	N7AGoodman-Buckler	-48.5425	17.6459	0.559822	0.064872	0.375306	Stiff stalk	0.559822	Admixed
Ames28367	CI7Goodman-Buckler	18.7941	21.7734	0.523833	0.346202	0.129965	Unclassified	0.523833	Admixed
Ames28411	NC258A	50.2421	-96.1486	0.918298	0.045612	0.036091	Unclassified	0.918298	Subpopulation1
Ames28412	NC262A	56.7347	-89.5686	0.857782	0.112818	0.0294	Unclassified	0.857782	Subpopulation1
Ames28413	NC262B	56.9786	-90.0516	0.855992	0.116492	0.027516	Unclassified	0.855992	Subpopulation1
Ames28414	NC266	-196.045	-10.5	0.000144	0.114404	0.885452	Unclassified	0.885452	Subpopulation3
Ames28415	NC266B	-196.644	-10.6981	0.000188	0.111616	0.888196	Unclassified	0.888196	Subpopulation3
Ames28416	NC268A	-180.468	-18.7111	0.030403	0.132621	0.836976	Unclassified	0.836976	Subpopulation3
Ames28417	NC270	-118.245	-4.35565	0.194748	0.158341	0.646911	Stiff stalk	0.646911	Admixed
Ames28418	NC276	-175.97	-29.3041	0.14918	0.101521	0.749298	Stiff stalk	0.749298	Subpopulation3
Ames28419	NC278	-199.649	1.58782	1e-06	0.211213	0.788786	Stiff stalk	0.788786	Subpopulation3
Ames28420	NC278A	-209.187	-3.15182	1e-06	0.18578	0.814219	Unclassified	0.814219	Subpopulation3
Ames28421	NC280	-300.543	-43.1158	1e-06	0	0.999999	Stiff stalk	0.999999	Subpopulation3
Ames28422	NC282	-287.221	-41.7009	0	0	0.999999	Stiff stalk	0.999999	Subpopulation3
Ames28423	NC284	-247.987	-42.7479	0.05625	1e-06	0.94375	Stiff stalk	0.94375	Subpopulation3
Ames28425	NC288	69.0669	-92.904	0.817161	0.182838	1e-06	Non-stiff stalk	0.817161	Subpopulation1
Ames28426	NC290	53.4319	-82.604	0.822521	0.133998	0.043481	Non-stiff stalk	0.822521	Subpopulation1
Ames28927	Mo27W	15.018	34.2173	0.377655	0.456465	0.165879	Unclassified	0.456465	Admixed
Ames28928	Mo28W	29.1331	50.2156	0.219672	0.648852	0.131477	Unclassified	0.648852	Admixed
Ames28929	Mo29W	40.9193	46.1341	0.263689	0.667558	0.068753	Unclassified	0.667558	Admixed
Ames28930	Mo30W	20.4411	28.7775	0.291739	0.562723	0.145538	Unclassified	0.562723	Admixed
Ames28931	Mo31W	1.5354	46.0734	0.219247	0.577883	0.20287	Unclassified	0.577883	Admixed
Ames28932	Mo32W	11.9005	20.4308	0.542562	0.302101	0.155336	Unclassified	0.542562	Admixed
Ames28933	Mo33W	28.7074	21.4492	0.390696	0.500017	0.109287	Unclassified	0.500017	Admixed
Ames28934	Mo36	1.21442	14.5944	0.542935	0.234402	0.222662	Unclassified	0.542935	Admixed
Ames28936	Mo38	-6.39826	19.886	0.51851	0.233074	0.248416	Unclassified	0.51851	Admixed
Ames28937	Mo39	-9.97376	14.3717	0.537515	0.206934	0.255552	Unclassified	0.537515	Admixed
Ames28938	Mo43	86.7416	-242.534	0.999999	1e-06	1e-06	Non-stiff stalk	0.999999	Subpopulation1
Ames28939	Mo44	6.02601	16.3509	0.766443	0.059138	0.174419	Unclassified	0.766443	Subpopulation1
Ames28941	Mo502W	40.4501	35.726	0.436626	0.50852	0.054854	Unclassified	0.50852	Admixed
Ames28942	Mo506W	42.3067	39.3847	0.394676	0.552847	0.052477	Unclassified	0.552847	Admixed
Ames28943	Mo508W	53.4731	39.7381	0.337938	0.633027	0.029035	Unclassified	0.633027	Admixed
Ames28945	Mo511W	29.8738	17.0372	0.556752	0.33899	0.104258	Unclassified	0.556752	Admixed
Ames28946	Mo512AW	39.8441	-3.43197	0.718616	0.224118	0.057266	Unclassified	0.718616	Subpopulation1
Ames28947	Mo512BW	48.5355	-13.2321	0.717313	0.257413	0.025274	Unclassified	0.717313	Subpopulation1
Ames28948	CI4A	41.8675	-11.7878	0.833037	0.10203	0.064933	Unclassified	0.833037	Subpopulation1
Ames28949	CI12	47.0199	27.0271	0.439109	0.508085	0.052806	Unclassified	0.508085	Admixed
Ames28950	CI24	31.0094	38.2794	0.342381	0.563613	0.094006	Unclassified	0.563613	Admixed
Ames28951	CI42B	8.85887	24.9311	0.49623	0.356934	0.146836	Unclassified	0.49623	Admixed
Ames28954	CI93A	42.6257	12.4313	0.499368	0.432487	0.068145	Unclassified	0.499368	Admixed
Ames29045	NEI9008	65.0417	71.5957	1e-06	0.999999	1e-06	Tropical	0.999999	Subpopulation2
Ames29394	1497-2	63.3831	75.3553	1e-06	0.999999	1e-06	Unclassified	0.999999	Subpopulation2
Ames29448	1416-1	61.4706	67.1635	1e-06	0.995183	0.004816	Unclassified	0.995183	Subpopulation2
Ames29451	GE440	26.8219	25.6453	0.424004	0.463973	0.112023	Unclassified	0.463973	Admixed
Ames30529	MR11CubanFlintS6	68.0014	66.845	1e-06	0.999999	1e-06	landraces	0.999999	Subpopulation2
Ames30535	MR22TuxpenoS6	67.8157	66.8594	1e-06	0.999999	1e-06	landraces	0.999999	Subpopulation2
Ames30790	GEMS-0175	-196.316	-9.3842	0.059866	0.065835	0.874298	Unclassified	0.874298	Subpopulation3
Ames30791	GEMS-0176	-165.329	-10.6678	1e-06	0.24656	0.753439	Unclassified	0.753439	Subpopulation3
Ames30792	GEMN-0177	40.7484	-65.4371	0.758141	0.182076	0.059783	Unclassified	0.758141	Subpopulation1
Ames30793	GEMN-0178	49.0086	-31.4534	0.738506	0.241661	0.019833	Unclassified	0.738506	Subpopulation1
Ames30795	GEMS-0180	-168.868	-5.51808	0.006514	0.217392	0.776094	Unclassified	0.776094	Subpopulation3
Ames30796	GEMS-0181	-146.348	-9.17609	0.105917	0.199509	0.694574	Unclassified	0.694574	Admixed
Ames30797	GEMS-0182	-188.438	1.82371	0.029571	0.131335	0.839093	Unclassified	0.839093	Subpopulation3
Ames30798	GEMS-0183	-206.76	5.18575	1e-06	0.08985	0.91015	Unclassified	0.91015	Subpopulation3
Ames30799	GEMS-0184	-201.206	-21.4231	0.077943	0.068963	0.853094	Unclassified	0.853094	Subpopulation3
Ames30855	CML325	44.0277	54.2437	0.16112	0.773995	0.064885	Tropical	0.773995	Subpopulation2
Ames30856	CML336	45.7401	53.3484	0.103256	0.831503	0.065241	Tropical	0.831503	Subpopulation2
Ames30857	CML337	39.1325	58.0097	0.111508	0.795953	0.092539	Tropical	0.795953	Subpopulation2
Ames30859	CML372	58.1036	70.782	0.01434	0.972452	0.013208	Tropical	0.972452	Subpopulation2
Ames30861	CML376	57.4154	74.7427	1e-06	0.990983	0.009016	Tropical	0.990983	Subpopulation2
Ames30862	NC44	41.2733	5.10809	0.501366	0.426429	0.072205	Unclassified	0.501366	Admixed
Ames30863	NC87	49.388	30.4361	0.435569	0.527277	0.037154	Unclassified	0.527277	Admixed
Ames30864	NC89	34.4413	15.9031	0.772384	0.148066	0.079549	Unclassified	0.772384	Subpopulation1
Ames30865	SC76	48.9317	48.0191	0.106722	0.847153	0.046125	Unclassified	0.847153	Subpopulation2
Ames30866	GEMN-0194	56.1011	-35.1279	0.442771	0.540307	0.016922	Unclassified	0.540307	Admixed
Ames30868	GEMN-0196	57.7835	-13.0031	0.31485	0.665656	0.019494	Unclassified	0.665656	Admixed
Ames30869	GEMN-0197	44.2236	-50.0183	0.568272	0.372635	0.059093	Unclassified	0.568272	Admixed
Ames30870	GEMN-0198	57.9788	-31.9914	0.367188	0.618093	0.014719	Unclassified	0.618093	Admixed
Ames7870		33.1893	33.9024	0.324499	0.574872	0.100629	Unclassified	0.574872	Admixed
Ames8397	B73HT	-228.734	-71.4527	0.121948	1e-06	0.878051	Stiff stalk	0.878051	Subpopulation3
CIze127	CI127	28.959	34.0163	0.359185	0.52695	0.113865	Unclassified	0.52695	Admixed
CIze21	CI21E	-16.1619	25.0424	0.537388	0.222538	0.240074	Unclassified	0.537388	Admixed
CIze23	CI23	45.5436	23.992	0.452615	0.475749	0.071635	Unclassified	0.475749	Admixed
CIze27	CI27	52.5484	12.7001	0.63581	0.328922	0.035268	Unclassified	0.63581	Admixed
CIze28	CI28A	41.6782	17.8865	0.537093	0.410982	0.051925	Unclassified	0.537093	Admixed
CIze29	CI29B	27.6934	-3.29815	0.918264	0.000696	0.08104	Unclassified	0.918264	Subpopulation1
CIze317	CI317B	34.5123	37.9344	0.386254	0.536409	0.077337	Unclassified	0.536409	Admixed
CIze38	CI38B	21.2574	22.4777	0.67004	0.217248	0.112712	Unclassified	0.67004	Admixed
CIze40	CI40A	18.1583	17.1923	0.767976	0.079817	0.152207	Unclassified	0.767976	Subpopulation1
CIze42	CI42A	8.71222	26.5801	0.488818	0.360581	0.150602	Unclassified	0.488818	Admixed
CIze45	CI45	32.7862	22.5579	0.543663	0.38361	0.072727	Unclassified	0.543663	Admixed
CIze49	CI49A	39.1985	34.4504	0.330137	0.605452	0.064411	Unclassified	0.605452	Admixed
CIze64		45.8541	46.4155	0.205999	0.748012	0.045989	Unclassified	0.748012	Subpopulation2
CIze81	CI81B	35.3375	27.4062	0.437678	0.476253	0.086068	Unclassified	0.476253	Admixed
CIze82	CI82A	39.1998	18.6323	0.545273	0.381735	0.072992	Unclassified	0.545273	Admixed
CIze83	CI83A	30.6612	22.5098	0.406389	0.47949	0.114122	Unclassified	0.47949	Admixed
CIze85	CI85B	43.5669	15.4814	0.547661	0.396028	0.056311	Unclassified	0.547661	Admixed
CIze86	CI86B	41.6465	4.62327	0.611241	0.321278	0.067481	Unclassified	0.611241	Admixed
CIze89	CI89B	13.9304	4.65446	0.618401	0.227715	0.153885	Unclassified	0.618401	Admixed
CIze90	CI90A	25.6406	11.2814	0.494243	0.396499	0.109259	Unclassified	0.494243	Admixed
CIze91	CI91B	35.105	26.467	0.455673	0.464532	0.079794	Unclassified	0.464532	Admixed
GA224	GA224	20.2458	8.44956	0.700818	0.180769	0.118414	Unclassified	0.700818	Subpopulation1
GEMN-0070	GEMN-0070	48.9635	37.8413	0.508183	0.457616	0.034202	Unclassified	0.508183	Admixed
GEMN-0071	GEMN-0071	55.9434	-19.4041	0.797919	0.18536	0.016721	Unclassified	0.797919	Subpopulation1
GEMN-0076	GEMN-0076	-34.7039	-11.0229	0.466428	0.199974	0.333598	Unclassified	0.466428	Admixed
GEMN-0077	GEMN-0077	63.5403	-60.329	0.686093	0.312923	0.000985	Unclassified	0.686093	Admixed
GEMN-0081	GEMN-0081	85.778	-169.383	0.98799	0.012009	1e-06	Unclassified	0.98799	Subpopulation1
GEMN-0082	GEMN-0082	79.5029	-166.205	0.937637	0.062362	1e-06	Unclassified	0.937637	Subpopulation1
GEMN-0083	GEMN-0083	-97.2081	4.68784	0.095617	0.379917	0.524467	Unclassified	0.524467	Admixed
GEMN-0087	GEMN-0087	49.0776	25.7793	0.420581	0.527	0.05242	Unclassified	0.527	Admixed
GEMN-0089	GEMN-0089	48.1715	28.588	0.388529	0.575051	0.03642	Unclassified	0.575051	Admixed
GEMN-0090	GEMN-0090	47.3982	31.384	0.405918	0.558867	0.035214	Unclassified	0.558867	Admixed
GEMN-0094	GEMN-0094	47.4771	-41.9023	0.617976	0.346008	0.036016	Unclassified	0.617976	Admixed
GEMN-0095	GEMN-0095	48.7275	-70.8732	0.810096	0.150017	0.039887	Unclassified	0.810096	Subpopulation1
GEMN-0096	GEMN-0096	51.3216	-90.2119	0.880808	0.094343	0.024848	Unclassified	0.880808	Subpopulation1
GEMN-0099	GEMN-0099	54.1966	-42.4083	0.799349	0.18785	0.012801	Unclassified	0.799349	Subpopulation1
GEMN-0164	GEMN-0164	57.6115	-33.4757	0.391248	0.586431	0.022321	Unclassified	0.586431	Admixed
GEMN-0165	GEMN-0165	55.0566	-29.0507	0.620633	0.364339	0.015028	Unclassified	0.620633	Admixed
GEMN-0166	GEMN-0166	44.6552	-39.1801	0.414182	0.527336	0.058481	Unclassified	0.527336	Admixed
GEMN-0168	GEMN-0168	43.214	11.5375	0.173542	0.769352	0.057106	Unclassified	0.769352	Subpopulation2
GEMN-0169	GEMN-0169	44.0421	-7.2327	0.277808	0.665361	0.056832	Unclassified	0.665361	Admixed
GEMN-0170	GEMN-0170	39.6925	-10.1507	0.266371	0.666192	0.067436	Unclassified	0.666192	Admixed
GEMN-0172	GEMN-0172	52.5521	-62.8077	0.555274	0.416219	0.028507	Unclassified	0.555274	Admixed
GEMN-0173	GEMN-0173	38.6928	-49.0478	0.450791	0.472515	0.076695	Unclassified	0.472515	Admixed
GEMN-0186	GEMN-0186	54.8967	-62.0929	0.736805	0.247385	0.01581	Unclassified	0.736805	Subpopulation1
GEMN-0187	GEMN-0187	73.1699	-170.437	0.905051	0.094949	0	Unclassified	0.905051	Subpopulation1
GEMN-0190	GEMN-0190	82.8513	-184.749	0.893551	0.106448	1e-06	Unclassified	0.893551	Subpopulation1
GEMN-0191	GEMN-0191	64.4778	-139.045	0.998359	1e-06	0.00164	Unclassified	0.998359	Subpopulation1
GEMN-0193	GEMN-0193	54.0701	-51.2909	0.827511	0.15803	0.014459	Unclassified	0.827511	Subpopulation1
GEMN-0207	GEMN-0207	41.6903	-52.298	0.674241	0.265034	0.060725	Unclassified	0.674241	Admixed
GEMN-0208	GEMN-0208	42.1368	-48.252	0.65576	0.286442	0.057798	Unclassified	0.65576	Admixed
GEMN-0209	GEMN-0209	75.9567	-111.118	0.654643	0.345314	4.3e-05	Unclassified	0.654643	Admixed
GEMN-0210	GEMN-0210	61.7221	-21.8915	0.485185	0.504711	0.010104	Unclassified	0.504711	Admixed
GEMN-0212	GEMN-0212	41.3754	-48.4356	0.480841	0.452426	0.066733	Unclassified	0.480841	Admixed
GEMN-0213	GEMN-0213	65.7009	12.5395	0.208604	0.791396	1e-06	Unclassified	0.791396	Subpopulation2
GEMN-0214	GEMN-0214	66.1783	-115.627	0.820695	0.172798	0.006507	Unclassified	0.820695	Subpopulation1
GEMN-0216	GEMN-0216	33.5005	15.7348	0.594831	0.338528	0.066641	Unclassified	0.594831	Admixed
GEMN-0217	GEMN-0217	46.2286	-19.9845	0.346252	0.6091	0.044648	Unclassified	0.6091	Admixed
GEMS-0068	GEMS-0068	-192.321	-15.1548	0.054888	0.172804	0.772308	Unclassified	0.772308	Subpopulation3
GEMS-0069	GEMS-0069	-153.68	19.5475	0.042817	0.232198	0.724985	Unclassified	0.724985	Subpopulation3
GEMS-0072	GEMS-0072	-199.455	-19.3528	0.01626	0.128673	0.855066	Unclassified	0.855066	Subpopulation3
GEMS-0073	GEMS-0073	-157.849	-5.00108	0.082673	0.175657	0.741669	Unclassified	0.741669	Subpopulation3
GEMS-0074	GEMS-0074	-196.806	-10.3307	0.009016	0.075153	0.915831	Unclassified	0.915831	Subpopulation3
GEMS-0078	GEMS-0078	-105.22	25.0618	0.142238	0.265807	0.591954	Unclassified	0.591954	Admixed
GEMS-0079	GEMS-0079	-137.881	20.3204	0.013172	0.296118	0.690709	Unclassified	0.690709	Admixed
GEMS-0080	GEMS-0080	-89.6999	29.67	0.075782	0.388131	0.536087	Unclassified	0.536087	Admixed
GEMS-0084	GEMS-0084	40.7124	-41.5334	0.695968	0.256648	0.047384	Unclassified	0.695968	Admixed
GEMS-0085	GEMS-0085	-76.9417	10.8725	0.348537	0.159048	0.492415	Unclassified	0.492415	Admixed
GEMS-0086	GEMS-0086	-186.284	-15.2014	0.000201	0.182068	0.817731	Unclassified	0.817731	Subpopulation3
GEMS-0185	GEMS-0185	-139.895	-18.9475	0.114586	0.200897	0.684517	Unclassified	0.684517	Admixed
GEMS-0188	GEMS-0188	-114.623	5.55761	0.197021	0.203349	0.59963	Unclassified	0.59963	Admixed
GEMS-0189	GEMS-0189	-138.871	2.12383	0.232772	0.039878	0.72735	Unclassified	0.72735	Subpopulation3
GEMS-0215	GEMS-0215	68.3023	-24.4141	0.356098	0.643902	1e-06	Unclassified	0.643902	Admixed
NSL117226	R802A	-34.1193	-8.49724	0.488694	0.136615	0.37469	Unclassified	0.488694	Admixed
NSL174429	INB101LFY/LFYA632XM16S5	-99.747	23.9161	0.363524	0.000114	0.636363	Unclassified	0.636363	Admixed
NSL197104	H116	49.45	2.20468	0.402778	0.550575	0.046647	Non-stiff stalk	0.550575	Admixed
NSL197105	H117	-101.15	43.194	0.070628	0.348223	0.581149	Unclassified	0.581149	Admixed
NSL197106	H118w	55.4026	52.892	0.167759	0.803396	0.028845	Unclassified	0.803396	Subpopulation2
NSL22628	K47	44.2012	40.9198	0.367215	0.58535	0.047435	Unclassified	0.58535	Admixed
NSL22629		4.22845	20.1744	0.733956	0.077533	0.188511	Unclassified	0.733956	Subpopulation1
NSL22630	K150	34.5421	17.0135	0.504632	0.39733	0.098038	Unclassified	0.504632	Admixed
NSL22631	K11	49.7247	15.4111	0.584535	0.372969	0.042497	Unclassified	0.584535	Admixed
NSL22632	K201	22.8169	21.2578	0.518117	0.370908	0.110976	Unclassified	0.518117	Admixed
NSL22633	KYS	25.3911	26.8906	0.573625	0.312754	0.113621	Unclassified	0.573625	Admixed
NSL22634	K155	31.7387	20.5878	0.543187	0.364511	0.092303	Unclassified	0.543187	Admixed
NSL22635	K41	37.012	9.0853	0.557697	0.366875	0.075428	Unclassified	0.557697	Admixed
NSL22893	F44	30.4058	37.1662	0.296192	0.58781	0.115998	Unclassified	0.58781	Admixed
NSL22983	C102	43.4663	22.0712	0.525949	0.416176	0.057875	Non-stiff stalk	0.525949	Admixed
NSL22984	J47	32.2882	23.9617	0.490307	0.416224	0.093469	Unclassified	0.490307	Admixed
NSL242483	R105	5.47829	-0.601512	0.773901	0.056674	0.169425	Unclassified	0.773901	Subpopulation1
NSL243016	792	-214.644	-5.04224	0.060006	1e-06	0.939993	Unclassified	0.939993	Subpopulation3
NSL28965	OH33	22.5794	9.47684	0.708786	0.17387	0.117343	Non-stiff stalk	0.708786	Subpopulation1
NSL28966	Oh40B	59.5301	-44.3211	0.965016	0.01845	0.016535	Non-stiff stalk	0.965016	Subpopulation1
NSL28967	Oh56A	24.4242	-87.2397	0.894466	1e-06	0.105533	Unclassified	0.894466	Subpopulation1
NSL28968	OH84	15.2594	25.3682	0.517423	0.330938	0.151639	Unclassified	0.517423	Admixed
NSL29284	R902A	-26.6627	5.69377	0.733158	1e-06	0.266841	Unclassified	0.733158	Subpopulation1
NSL29285	R903B	85.938	-191.531	0.999999	1e-06	0	Unclassified	0.999999	Subpopulation1
NSL29287	R941	32.1739	29.7906	0.595962	0.324105	0.079933	Unclassified	0.595962	Admixed
NSL29303	R216	12.538	9.72352	0.824585	0.034116	0.141299	Unclassified	0.824585	Subpopulation1
NSL29304	R216A	12.0239	3.47757	0.822783	0.03366	0.143557	Unclassified	0.822783	Subpopulation1
NSL29305	R218	56.9742	-77.859	0.999999	0	1e-06	Unclassified	0.999999	Subpopulation1
NSL29314	R219	46.7275	-62.1937	0.984505	1e-06	0.015494	Unclassified	0.984505	Subpopulation1
NSL29316	R220	27.2671	-87.4961	0.912278	0.000451	0.08727	Unclassified	0.912278	Subpopulation1
NSL29319	R222	35.7093	-56.2776	0.955035	1e-06	0.044964	Unclassified	0.955035	Subpopulation1
NSL29898	R222A	24.0775	-80.3057	0.875036	0.029331	0.095632	Unclassified	0.875036	Subpopulation1
NSL30038	K4	29.5635	19.8983	0.499643	0.40022	0.100137	Unclassified	0.499643	Admixed
NSL30046	B41	26.7216	-25.5241	0.934078	1e-06	0.065922	Unclassified	0.934078	Subpopulation1
NSL30055	W374R2	27.636	-1.48827	0.792303	0.096094	0.111603	Unclassified	0.792303	Subpopulation1
NSL30056	W703	16.6057	18.8503	0.511797	0.350721	0.137481	Non-stiff stalk	0.511797	Admixed
NSL30058		36.6896	-63.957	0.979879	1e-06	0.02012	Unclassified	0.979879	Subpopulation1
NSL30059		46.083	-5.00906	0.842853	0.119553	0.037595	Unclassified	0.842853	Subpopulation1
NSL30060	W23	37.9476	23.1724	0.538071	0.394734	0.067195	Stiff stalk	0.538071	Admixed
NSL30062		14.8214	-4.1085	0.750835	0.109112	0.140053	Unclassified	0.750835	Subpopulation1
NSL30063	W182D	28.0093	-2.51697	0.876896	0.020872	0.102233	Unclassified	0.876896	Subpopulation1
NSL30064	W24	0.416196	-17.8342	0.755244	0.053926	0.19083	Unclassified	0.755244	Subpopulation1
NSL30065	W9	23.7979	21.8843	0.532196	0.344478	0.123326	Unclassified	0.532196	Admixed
NSL30066	WR3	42.7137	13.4253	0.646965	0.283949	0.069085	Unclassified	0.646965	Admixed
NSL30067	W22R	28.8595	-3.9807	0.913416	1e-06	0.086583	Non-stiff stalk	0.913416	Subpopulation1
NSL30068	W374B	15.7008	5.82113	0.869255	1e-06	0.130744	Unclassified	0.869255	Subpopulation1
NSL30070	WM13R	58.2049	13.637	0.755882	0.235066	0.009052	Unclassified	0.755882	Subpopulation1
NSL30071	W32	24.1285	9.37316	0.789261	0.092022	0.118717	Unclassified	0.789261	Subpopulation1
NSL30073	W37A	17.1775	10.4979	0.730189	0.141751	0.12806	Unclassified	0.730189	Subpopulation1
NSL30074	W182E	28.0686	-3.78349	0.859099	0.037866	0.103036	Unclassified	0.859099	Subpopulation1
NSL30835	SD10	23.4365	-31.6066	0.752236	0.100184	0.14758	Unclassified	0.752236	Subpopulation1
NSL30861	A	15.3409	15.4197	0.852024	0.007291	0.140685	Unclassified	0.852024	Subpopulation1
NSL30863	L	4.45289	23.5782	0.588015	0.233491	0.178494	Unclassified	0.588015	Admixed
NSL30864	HY2	-29.2065	5.59052	0.726533	1e-06	0.273466	Stiff stalk	0.726533	Subpopulation1
NSL30865	R2	23.5007	16.2702	0.743263	0.140189	0.116548	Unclassified	0.743263	Subpopulation1
NSL30866	R004	15.682	-15.92	0.876483	1e-06	0.123516	Unclassified	0.876483	Subpopulation1
NSL30867	M14	14.0279	6.19029	0.867191	0.000212	0.132597	Unclassified	0.867191	Subpopulation1
NSL30868	R30	41.6632	24.5801	0.576425	0.375389	0.048187	Unclassified	0.576425	Admixed
NSL30869	R53	36.5429	8.36562	0.641152	0.282079	0.076768	Unclassified	0.641152	Admixed
NSL30871	R061	18.3626	23.5887	0.560994	0.307235	0.131771	Unclassified	0.560994	Admixed
NSL30872	R71	12.5406	4.90399	0.835462	0.021059	0.143479	Unclassified	0.835462	Subpopulation1
NSL30874	R75	31.574	-24.8102	0.931898	1e-06	0.068102	Unclassified	0.931898	Subpopulation1
NSL30875	R76	32.3403	7.16808	0.792836	0.109629	0.097535	Unclassified	0.792836	Subpopulation1
NSL30876	R78	28.8671	10.426	0.5864	0.293903	0.119697	Unclassified	0.5864	Admixed
NSL30877	R84	30.8038	-32.1646	0.771498	0.127195	0.101306	Unclassified	0.771498	Subpopulation1
NSL30878	R101	25.7758	-8.22444	0.771118	0.137805	0.091077	Unclassified	0.771118	Subpopulation1
NSL30879	R103	30.191	18.1107	0.786372	0.120664	0.092964	Unclassified	0.786372	Subpopulation1
NSL30880		5.30001	1.82281	0.743124	0.088616	0.16826	Unclassified	0.743124	Subpopulation1
NSL30883	R113	18.3476	2.72381	0.677866	0.195384	0.12675	Unclassified	0.677866	Admixed
NSL30884	R134	39.4852	17.6447	0.547726	0.38439	0.067884	Unclassified	0.547726	Admixed
NSL30885	R138	-2.97251	6.44629	0.721615	0.08477	0.193615	Unclassified	0.721615	Subpopulation1
NSL30888	R154	33.8542	16.2853	0.756602	0.155585	0.087813	Unclassified	0.756602	Subpopulation1
NSL30890	R159	34.176	19.3746	0.762239	0.147247	0.090514	Unclassified	0.762239	Subpopulation1
NSL30891		27.7423	20.207	0.785587	0.129003	0.085409	Unclassified	0.785587	Subpopulation1
NSL30894	R177	52.5446	-6.89415	0.893121	0.084022	0.022857	Unclassified	0.893121	Subpopulation1
NSL30895	R181	19.5224	-0.55765	0.782423	0.082167	0.13541	Unclassified	0.782423	Subpopulation1
NSL30896	R181B	18.8357	-0.791826	0.78384	0.077685	0.138475	Unclassified	0.78384	Subpopulation1
NSL30898	R192	11.71	1.51505	0.819952	0.038134	0.141914	Unclassified	0.819952	Subpopulation1
NSL30901	R196	-24.2535	-14.7345	0.735908	1e-06	0.264091	Unclassified	0.735908	Subpopulation1
NSL30902	R197	18.7132	14.8971	0.702394	0.168942	0.128664	Unclassified	0.702394	Subpopulation1
NSL30903	90	29.5144	23.6038	0.602097	0.298423	0.09948	Unclassified	0.602097	Admixed
NSL30904	4226	43.8469	19.7755	0.590863	0.35171	0.057427	Unclassified	0.590863	Admixed
NSL30905	5120B	25.0462	11.1975	0.695795	0.175029	0.129176	Unclassified	0.695795	Admixed
NSL30906	R904A	27.5036	17.2941	0.528259	0.372442	0.099299	Unclassified	0.528259	Admixed
NSL30907	R906	24.4738	-28.0135	0.663788	0.232745	0.103467	Unclassified	0.663788	Admixed
NSL30908	R907	17.3811	14.9672	0.728366	0.125235	0.146398	Unclassified	0.728366	Subpopulation1
NSL30909	R909	23.7479	-26.0776	0.925111	1e-06	0.074888	Unclassified	0.925111	Subpopulation1
NSL30910	R914	12.1706	2.10161	0.860312	1e-06	0.139688	Unclassified	0.860312	Subpopulation1
NSL30912	R921E	-3.6758	3.91787	0.720548	0.077421	0.20203	Unclassified	0.720548	Subpopulation1
NSL30913	R924	-212.763	41.6169	1e-06	0	0.999999	Unclassified	0.999999	Subpopulation3
NSL32720	ND33	45.5054	23.8207	0.446875	0.502506	0.050618	Unclassified	0.502506	Admixed
NSL32723	ND1	40.6332	24.8438	0.451703	0.489496	0.058801	Unclassified	0.489496	Admixed
NSL32726	ND167	28.2506	19.4996	0.530578	0.365098	0.104325	Unclassified	0.530578	Admixed
NSL32727	ND-B8	42.9049	18.633	0.541359	0.347976	0.110666	Unclassified	0.541359	Admixed
NSL32728	ND230	29.6121	26.9772	0.526679	0.361615	0.111706	Unclassified	0.526679	Admixed
NSL32729	ND468	19.4365	1.44043	0.782154	0.091327	0.126519	Unclassified	0.782154	Subpopulation1
NSL32730	ND405	11.0024	25.7941	0.609692	0.229211	0.161098	Unclassified	0.609692	Admixed
NSL32731	ND385	26.4852	16.0472	0.592599	0.286185	0.121216	Unclassified	0.592599	Admixed
NSL32732	ND203	10.954	12.0211	0.594169	0.241571	0.164259	Unclassified	0.594169	Admixed
NSL32733	ND376	15.0927	8.91607	0.794448	0.058851	0.146701	Unclassified	0.794448	Subpopulation1
NSL32734	ND408	11.6924	27.3674	0.597345	0.244865	0.15779	Unclassified	0.597345	Admixed
NSL32735	ND407	14.9074	28.6039	0.590358	0.260712	0.14893	Unclassified	0.590358	Admixed
NSL32736	ND480	21.1435	29.0704	0.621721	0.252665	0.125615	Unclassified	0.621721	Admixed
NSL32738	ND283	25.708	27.3618	0.543241	0.352584	0.104175	Unclassified	0.543241	Admixed
NSL32739	ND474	30.3364	-2.67247	0.891815	0.023574	0.084611	Unclassified	0.891815	Subpopulation1
NSL34374	SD15	35.7446	-38.1265	0.826344	0.099397	0.074259	Unclassified	0.826344	Subpopulation1
NSL42804	R223	44.7819	-1.37318	0.802894	0.153845	0.043261	Unclassified	0.802894	Subpopulation1
NSL42872	A7	24.2174	26.7525	0.493057	0.385468	0.121475	Non-stiff stalk	0.493057	Admixed
NSL42873	A12	19.7562	13.3449	0.608304	0.258361	0.133335	Unclassified	0.608304	Admixed
NSL42875	A71	4.8354	4.93883	0.736183	0.091434	0.172384	Unclassified	0.736183	Subpopulation1
NSL42877	A165	51.5164	2.54788	0.729544	0.230074	0.040382	Non-stiff stalk	0.729544	Subpopulation1
NSL42878	A171	37.3983	20.3862	0.588531	0.331646	0.079823	Unclassified	0.588531	Admixed
NSL43597	Tx441	47.4011	27.9643	0.408805	0.54203	0.049165	Unclassified	0.54203	Admixed
NSL437871	AusTRCF305795	30.203	31.199	0.314318	0.596073	0.089609	Unclassified	0.596073	Admixed
NSL437877	AusTRCF305801	50.597	39.4958	0.074713	0.891523	0.033764	Unclassified	0.891523	Subpopulation2
NSL437878	AusTRCF305802	34.0188	35.1863	0.197851	0.709706	0.092442	Unclassified	0.709706	Subpopulation2
NSL437879	AusTRCF305803	57.4079	49.0028	0.050884	0.939503	0.009614	Unclassified	0.939503	Subpopulation2
NSL437884	AusTRCF305808	47.9671	47.8187	0.127518	0.83564	0.036841	Unclassified	0.83564	Subpopulation2
NSL437890	AusTRCF305816	-64.7547	27.5866	0.254402	0.304569	0.441029	Unclassified	0.441029	Admixed
NSL437891	AusTRCF305817	62.9001	37.0256	0.139598	0.860311	9.1e-05	Unclassified	0.860311	Subpopulation2
NSL437893	AusTRCF305819	-130.385	9.79835	1e-06	0.410659	0.589341	Unclassified	0.589341	Admixed
NSL437895	AusTRCF305821	45.6992	40.0206	0.056184	0.892552	0.051265	Unclassified	0.892552	Subpopulation2
NSL437896	AusTRCF305822	-83.2446	-46.8148	0.451189	0.076077	0.472734	Unclassified	0.472734	Admixed
NSL437897	AusTRCF305823	-188.674	-1.96221	0.028395	0.159192	0.812413	Unclassified	0.812413	Subpopulation3
NSL437899	AusTRCF305825	-32.9706	34.1575	0.123044	0.593309	0.283647	Unclassified	0.593309	Admixed
NSL437903	AusTRCF305829	62.064	-198.72	0.908747	0.040379	0.050874	Unclassified	0.908747	Subpopulation1
NSL437905	AusTRCF305831	-131.234	-49.7794	0.230824	0.133364	0.635813	Unclassified	0.635813	Admixed
NSL437907	AusTRCF305833	-236.115	-27.3814	1e-06	0.111716	0.888283	Unclassified	0.888283	Subpopulation3
NSL437908	AusTRCF305834	60.5046	-8.75483	0.358941	0.632032	0.009027	Unclassified	0.632032	Admixed
NSL437909	AusTRCF305835	-132.909	-31.3073	0.180106	0.175112	0.644783	Unclassified	0.644783	Admixed
NSL437910	AusTRCF305836	-159.589	-49.9015	0.185749	0.099606	0.714645	Unclassified	0.714645	Subpopulation3
NSL437913	AusTRCF305839	-271.351	-57.5486	1e-06	0	0.999999	Unclassified	0.999999	Subpopulation3
NSL437914	AusTRCF305840	-282.407	-39.1957	0	0	0.999999	Unclassified	0.999999	Subpopulation3
NSL437915	AusTRCF305841	85.4817	-78.6042	0.488807	0.511193	0	Unclassified	0.511193	Admixed
NSL437920	AusTRCF305846	94.9174	-295.213	0.999999	0	1e-06	Unclassified	0.999999	Subpopulation1
NSL437923	AusTRCF305849	95.0892	-290.433	0.999999	0	1e-06	Unclassified	0.999999	Subpopulation1
NSL437925	AusTRCF306065	90.0682	-236.365	0.999999	1e-06	0	Unclassified	0.999999	Subpopulation1
NSL437928	AusTRCF306068	50.0059	38.5584	0.217987	0.734535	0.047478	Unclassified	0.734535	Subpopulation2
NSL437929	AusTRCF306234	46.8353	-6.19002	0.435975	0.507684	0.056341	Unclassified	0.507684	Admixed
NSL437930	AusTRCF306235	-254.612	-37.2661	0.028403	1e-06	0.971597	Unclassified	0.971597	Subpopulation3
NSL437931	AusTRCF306236	65.2796	-84.0828	0.535217	0.464783	1e-06	Unclassified	0.535217	Admixed
NSL437932	AusTRCF306237	70.8966	-103.598	0.640399	0.3596	1e-06	Unclassified	0.640399	Admixed
NSL437933	AusTRCF306238	57.4888	-136.74	0.826433	0.149697	0.02387	Unclassified	0.826433	Subpopulation1
NSL437934	AusTRCF306239	48.6955	-106.938	0.663268	0.273612	0.06312	Unclassified	0.663268	Admixed
NSL437935	AusTRCF306240	60.1976	-126.787	0.816304	0.165063	0.018633	Unclassified	0.816304	Subpopulation1
NSL437936	AusTRCF306241	62.1691	-69.5233	0.651835	0.338416	0.009749	Unclassified	0.651835	Admixed
NSL437937	AusTRCF306242	56.6541	-4.14367	0.368006	0.617149	0.014846	Unclassified	0.617149	Admixed
NSL437939	AusTRCF306244	61.5023	-40.3503	0.381586	0.588867	0.029547	Unclassified	0.588867	Admixed
NSL437940	AusTRCF306245	58.9008	-0.548194	0.335438	0.65437	0.010193	Unclassified	0.65437	Admixed
NSL437943	AusTRCF306254	57.4797	52.2268	1e-06	0.981874	0.018126	Unclassified	0.981874	Subpopulation2
NSL437946	AusTRCF306257	37.2371	41.6455	0.249198	0.666714	0.084089	Unclassified	0.666714	Admixed
NSL437947	AusTRCF306258	32.942	24.2211	0.395982	0.507015	0.097002	Unclassified	0.507015	Admixed
NSL437948	AusTRCF306259	43.4261	49.624	0.186137	0.734031	0.079832	Unclassified	0.734031	Subpopulation2
NSL437952	AusTRCF306264	36.7061	31.6948	0.28261	0.64414	0.073251	Unclassified	0.64414	Admixed
NSL437959	AusTRCF306273	-55.3564	-52.0367	0.478468	0.125979	0.395553	Unclassified	0.478468	Admixed
NSL437960	AusTRCF306274	-14.7631	-69.5805	0.56455	0.175792	0.259659	Unclassified	0.56455	Admixed
NSL437962	AusTRCF306276	-78.1985	-32.7396	0.353827	0.189541	0.456632	Unclassified	0.456632	Admixed
NSL437964	AusTRCF306278	-9.57168	-48.6328	0.512362	0.245069	0.242569	Unclassified	0.512362	Admixed
NSL437966	AusTRCF306280	46.1037	-63.6068	0.707889	0.215173	0.076938	Unclassified	0.707889	Subpopulation1
NSL437968	AusTRCF306282	-7.53797	-49.5149	0.490473	0.271509	0.238019	Unclassified	0.490473	Admixed
NSL437971	AusTRCF306285	-6.82023	-70.1275	0.536742	0.219262	0.243996	Unclassified	0.536742	Admixed
NSL437973	AusTRCF306287	83.735	-106.444	0.704322	0.295678	0	Unclassified	0.704322	Subpopulation1
NSL437976	AusTRCF306290	62.3868	-74.2597	0.501947	0.472343	0.02571	Unclassified	0.501947	Admixed
NSL437979	AusTRCF306293	73.6004	-72.4423	0.613062	0.386938	1e-06	Unclassified	0.613062	Admixed
NSL437980	AusTRCF306294	74.0002	-75.1593	0.656019	0.34398	1e-06	Unclassified	0.656019	Admixed
NSL437981	AusTRCF306295	82.7873	-82.5164	0.561561	0.438438	1e-06	Unclassified	0.561561	Admixed
NSL437982	AusTRCF306296	81.5261	-78.8712	0.565548	0.434451	0	Unclassified	0.565548	Admixed
NSL437987	AusTRCF306301	72.0079	-101.049	0.800188	0.199812	0	Unclassified	0.800188	Subpopulation1
NSL437988	AusTRCF306302	-269.053	-12.7824	0	0	0.999999	Unclassified	0.999999	Subpopulation3
NSL437989	AusTRCF306303	-264.654	-4.03342	0	0	0.999999	Unclassified	0.999999	Subpopulation3
NSL437990	AusTRCF306304	-274.647	-20.2472	0	1e-06	0.999999	Unclassified	0.999999	Subpopulation3
NSL437992	AusTRCF306306	-288.435	-33.3347	1e-06	0	0.999999	Unclassified	0.999999	Subpopulation3
NSL437993	AusTRCF306307	-290.434	-35.6286	0	0	0.999999	Unclassified	0.999999	Subpopulation3
NSL437994	AusTRCF306308	-294.553	-34.7015	1e-06	0	0.999999	Unclassified	0.999999	Subpopulation3
NSL437995	AusTRCF306309	-294.535	-37.5452	1e-06	0	0.999999	Unclassified	0.999999	Subpopulation3
NSL437996	AusTRCF306310	-286.398	-27.7962	0	0	0.999999	Unclassified	0.999999	Subpopulation3
NSL437998	AusTRCF306312	38.231	-11.0982	0.558651	0.386759	0.054591	Unclassified	0.558651	Admixed
NSL438002	AusTRCF306316	60.3014	-11.7297	0.497247	0.489574	0.013179	Unclassified	0.497247	Admixed
NSL438005	AusTRCF306319	-0.437652	42.7094	0.098447	0.685524	0.216028	Unclassified	0.685524	Admixed
NSL438007	AusTRCF306321	44.8456	6.827	0.389172	0.567634	0.043193	Unclassified	0.567634	Admixed
NSL438008	AusTRCF306322	44.2412	11.8298	0.261763	0.696788	0.04145	Unclassified	0.696788	Admixed
NSL438009	AusTRCF306323	42.7414	18.2999	0.58645	0.353135	0.060415	Unclassified	0.58645	Admixed
NSL438010	AusTRCF306324	55.6297	-3.37561	0.48315	0.488897	0.027952	Unclassified	0.488897	Admixed
NSL438013	AusTRCF306327	-28.6999	15.5943	0.194622	0.497906	0.307472	Unclassified	0.497906	Admixed
NSL438019	AusTRCF306333	-127.225	-43.6996	0.425794	1e-06	0.574205	Unclassified	0.574205	Admixed
NSL438021	AusTRCF306335	53.0403	-69.0021	0.744372	0.253264	0.002365	Unclassified	0.744372	Subpopulation1
NSL438022	AusTRCF306336	49.4333	-30.1487	0.696622	0.282442	0.020936	Unclassified	0.696622	Admixed
NSL438030	AusTRCF306344	-124.662	-48.5488	0.244252	0.13867	0.617078	Unclassified	0.617078	Admixed
NSL438031	AusTRCF306345	66.216	-44.9678	0.697519	0.302481	1e-06	Unclassified	0.697519	Admixed
NSL438032	AusTRCF306346	76.3784	-43.4196	0.668508	0.331492	0	Unclassified	0.668508	Admixed
NSL438033	AusTRCF306347	-234.047	-6.51004	1e-06	0	0.999999	Unclassified	0.999999	Subpopulation3
NSL438034	AusTRCF306348	-231.936	-6.41224	1e-06	0	0.999999	Unclassified	0.999999	Subpopulation3
NSL438036	AusTRCF306350	67.4414	-62.8202	0.750573	0.249427	1e-06	Unclassified	0.750573	Subpopulation1
NSL438037	AusTRCF306351	74.9239	11.8404	0.284916	0.715084	1e-06	Unclassified	0.715084	Subpopulation2
NSL438038	AusTRCF306352	68.4692	25.4406	0.164192	0.835808	1e-06	Unclassified	0.835808	Subpopulation2
NSL438039	AusTRCF306353	78.6605	2.99453	0.341254	0.658746	0	Unclassified	0.658746	Admixed
NSL438040	AusTRCF306354	77.1854	11.3933	0.268183	0.731816	1e-06	Unclassified	0.731816	Subpopulation2
NSL438041	AusTRCF306355	56.7062	-1.9203	0.446855	0.552631	0.000514	Unclassified	0.552631	Admixed
NSL438042	AusTRCF306356	66.4706	-2.48091	0.425888	0.574111	1e-06	Unclassified	0.574111	Admixed
NSL438043	AusTRCF306357	56.6914	-9.54338	0.506699	0.491192	0.002109	Unclassified	0.506699	Admixed
NSL52605	OH7K	24.6342	22.4612	0.7386	0.139015	0.122385	Unclassified	0.7386	Subpopulation1
NSL53081	SC276Q	47.0608	45.5909	0.115125	0.835878	0.048998	Unclassified	0.835878	Subpopulation2
NSL53084		30.5583	33.8177	0.299783	0.604796	0.095421	Unclassified	0.604796	Admixed
NSL53086	SC212M	47.2041	36.0912	0.289641	0.658197	0.052162	Unclassified	0.658197	Admixed
NSL53089	SC285	46.9338	36.6825	0.370789	0.586263	0.042948	Unclassified	0.586263	Admixed
NSL53093	SC353	37.2107	23.3295	0.478872	0.422713	0.098415	Unclassified	0.478872	Admixed
NSL53094	SC357	26.8434	42.2572	0.259507	0.622078	0.118415	Unclassified	0.622078	Admixed
NSL65863	B7	-5.81073	11.8253	0.647838	0.147663	0.204499	Unclassified	0.647838	Admixed
NSL65864	B8	45.4773	15.1353	0.598989	0.291394	0.109617	Unclassified	0.598989	Admixed
NSL65865	B10	-55.6631	8.80654	0.523759	0.062178	0.414064	Unclassified	0.523759	Admixed
NSL65866	B14	-217.55	44.1387	0	0	0.999999	Stiff stalk	0.999999	Subpopulation3
NSL65868	B21	4.32582	5.5089	0.635957	0.1775	0.186543	Unclassified	0.635957	Admixed
NSL65869	B38	-17.2255	2.96041	0.608727	0.120031	0.271241	Unclassified	0.608727	Admixed
NSL65871	I205	-2.71013	-1.90731	0.827317	0	0.172682	Unclassified	0.827317	Subpopulation1
NSL65872	L289	36.8372	2.4449	0.613287	0.31513	0.071583	Non-stiff stalk	0.613287	Admixed
NSL65873	L317	40.5847	28.426	0.539595	0.40732	0.053085	Unclassified	0.539595	Admixed
NSL65874	Os420	17.442	16.2231	0.788114	0.057441	0.154446	Stiff stalk	0.788114	Subpopulation1
NSL68211	OH422	24.6627	26.5305	0.494148	0.392907	0.112944	Unclassified	0.494148	Admixed
NSL68241		32.8898	35.1667	0.275633	0.634305	0.090062	Unclassified	0.634305	Admixed
NSL68242		47.725	36.8505	0.287808	0.66119	0.051002	Unclassified	0.66119	Admixed
NSL68243		35.4807	25.6027	0.441188	0.475397	0.083415	Unclassified	0.475397	Admixed
NSL68249		48.3096	21.4322	0.283015	0.662968	0.054017	Unclassified	0.662968	Admixed
NSL68252		29.5656	38.1809	0.250038	0.642502	0.107461	Unclassified	0.642502	Admixed
NSL81595	A238	6.08038	8.39651	0.750142	0.063573	0.186285	Unclassified	0.750142	Subpopulation1
NSL81596	A258	20.2405	16.0701	0.828107	0.047727	0.124166	Unclassified	0.828107	Subpopulation1
NSL81597	A648	44.2159	31.4434	0.436434	0.520145	0.04342	Unclassified	0.520145	Admixed
NSL81598	A657	42.9036	-45.6239	0.727097	0.211793	0.06111	Stiff stalk	0.727097	Subpopulation1
NSL81600	A660	30.0819	-8.66285	0.857319	0.066439	0.076243	Unclassified	0.857319	Subpopulation1
NSL91618	Oh28	0.791807	11.3617	0.649097	0.146497	0.204406	Unclassified	0.649097	Admixed
PI186182	INBRED378	54.5775	33.2637	0.358342	0.606952	0.034706	Unclassified	0.606952	Admixed
PI186183	INBRED379	61.3551	62.1994	1e-06	0.984048	0.015952	Unclassified	0.984048	Subpopulation2
PI186185	INBRED605	62.0797	68.9715	1e-06	0.993869	0.00613	Unclassified	0.993869	Subpopulation2
PI186188	INBRED619	52.336	59.7944	0.123609	0.848532	0.027859	Unclassified	0.848532	Subpopulation2
PI186191	INBRED627	66.0597	70.3911	0.002918	0.997081	1e-06	Unclassified	0.997081	Subpopulation2
PI186192	INBRED45	33.2185	17.7106	0.532549	0.374037	0.093415	Unclassified	0.532549	Admixed
PI186193	INBREDA-243-1	65.6524	51.9958	0.136625	0.863319	5.7e-05	Unclassified	0.863319	Subpopulation2
PI186195	INBRED41	44.99	44.9241	0.278608	0.665987	0.055405	Unclassified	0.665987	Admixed
PI186196	INBRED109	39.8317	47.7419	0.216883	0.719463	0.063654	Unclassified	0.719463	Subpopulation2
PI186197	INBRED100	53.0332	55.9693	0.101863	0.862443	0.035694	Unclassified	0.862443	Subpopulation2
PI186199	INBRED141	26.4389	24.3864	0.58077	0.306717	0.112513	Unclassified	0.58077	Admixed
PI186215	INBRED2-687	66.1821	74.2526	1e-06	0.997522	0.002477	Unclassified	0.997522	Subpopulation2
PI186216	INBRED1-1265	59.0293	57.0146	0.138506	0.850412	0.011082	Unclassified	0.850412	Subpopulation2
PI186217	INBRED19-86	59.9822	73.1109	1e-06	0.997773	0.002227	Unclassified	0.997773	Subpopulation2
PI186218	INBRED34-1141	65.3783	71.6188	0.002565	0.997434	1e-06	Unclassified	0.997434	Subpopulation2
PI186219	INBRED34-1181	61.5489	63.3746	0.018605	0.967287	0.014108	Unclassified	0.967287	Subpopulation2
PI186221	INBRED39-1084	63.0783	69.3378	0.063041	0.932693	0.004265	Unclassified	0.932693	Subpopulation2
PI186223	INBRED41-1781	63.0342	78.4951	0.001085	0.993007	0.005908	Unclassified	0.993007	Subpopulation2
PI186224	INBRED42-492	46.0575	60.3003	0.097854	0.845487	0.056659	Unclassified	0.845487	Subpopulation2
PI186226	INBRED305	62.2288	69.4228	1e-06	0.993362	0.006638	Unclassified	0.993362	Subpopulation2
PI186228	INBRED317	63.3399	68.4305	0.017038	0.97503	0.007932	Unclassified	0.97503	Subpopulation2
PI186229	INBRED321	57.9639	65.8749	0.03947	0.936648	0.023882	Unclassified	0.936648	Subpopulation2
PI186230	INBRED334	35.8895	34.717	0.295804	0.599865	0.104331	Unclassified	0.599865	Admixed
PI198888	4F-35BK	54.8695	63.607	0.084879	0.891372	0.023749	Unclassified	0.891372	Subpopulation2
PI198889	4F-182BS11	46.1743	44.7529	0.236845	0.71511	0.048044	Unclassified	0.71511	Subpopulation2
PI198892	4F-234BX4	53.2741	59.4772	0.103553	0.866108	0.03034	Unclassified	0.866108	Subpopulation2
PI198893	4F-240BX16	60.9594	62.8336	0.086946	0.895642	0.017412	Unclassified	0.895642	Subpopulation2
PI198894	4F-259HQ	57.9675	67.7592	0.041647	0.934698	0.023654	Unclassified	0.934698	Subpopulation2
PI198895	4F-285TX15	58.9028	69.4309	0.067601	0.91368	0.018719	Unclassified	0.91368	Subpopulation2
PI198896	4F-300AD3	42.1423	53.9317	0.139885	0.787742	0.072373	Unclassified	0.787742	Subpopulation2
PI198901	4F-342CM4	51.2358	56.6933	0.107771	0.856872	0.035357	Unclassified	0.856872	Subpopulation2
PI198902	4F-345CN12	59.6999	69.6336	1e-06	0.965821	0.034179	Unclassified	0.965821	Subpopulation2
PI198904	4F-353CN33	62.4451	74.3362	1e-06	0.985054	0.014946	Unclassified	0.985054	Subpopulation2
PI198906	4F-403JV15	41.2507	52.2305	0.182498	0.751116	0.066386	Unclassified	0.751116	Subpopulation2
PI200179	NY3NevehYaar	53.5361	19.2712	0.429157	0.536325	0.034518	Unclassified	0.536325	Admixed
PI200181	NY65NevehYaar	44.2789	24.9349	0.43924	0.509411	0.05135	Unclassified	0.509411	Admixed
PI200182	NY159NevehYaar	31.331	32.0933	0.425917	0.476491	0.097592	Unclassified	0.476491	Admixed
PI200184	NY166NevehYaar	36.0387	35.5899	0.414684	0.497905	0.087411	Unclassified	0.497905	Admixed
PI200185	NY188NevehYaar	21.1474	29.0339	0.428067	0.442821	0.129113	Unclassified	0.442821	Admixed
PI200187	NY318NeveyYaar	35.8085	23.4498	0.371038	0.544209	0.084753	Unclassified	0.544209	Admixed
PI200188	NY364NevehYaar	34.7316	21.6278	0.41118	0.499271	0.089549	Unclassified	0.499271	Admixed
PI200191	NY476NevehYaar	20.0185	29.4895	0.369181	0.486473	0.144346	Unclassified	0.486473	Admixed
PI200192	NY592NevehYaar	17.8374	12.8724	0.595676	0.25838	0.145944	Unclassified	0.595676	Admixed
PI200193	NY643NevehYaar	19.3973	4.89927	0.656249	0.20015	0.143601	Unclassified	0.656249	Admixed
PI200194	NY971NevehYaar	34.7597	22.8879	0.495882	0.407768	0.09635	Unclassified	0.495882	Admixed
PI200195	NY992NevehYaar	32.6111	14.5466	0.513291	0.390326	0.096383	Unclassified	0.513291	Admixed
PI200196	NY1000NevehYaar	26.9869	16.3121	0.535204	0.356817	0.107979	Unclassified	0.535204	Admixed
PI221733	A13-2INBREDPOTCHEFSTROOMPEARL	35.9026	22.4618	0.36768	0.534427	0.097893	Unclassified	0.534427	Admixed
PI221734	A14INBREDPOTCHEFSTROOMPEARL	26.037	23.1512	0.388204	0.490375	0.121422	Unclassified	0.490375	Admixed
PI221735	A15-1INBREDPOTCHEFSTROOMPEARL	37.6945	29.038	0.329472	0.59539	0.075138	Unclassified	0.59539	Admixed
PI221736	A16-3-2INBREDPOTCHEFSTROOMPEARL	37.3514	28.0664	0.329137	0.593649	0.077213	Unclassified	0.593649	Admixed
PI221737	A17-1-1INBREDPOTCHEFSTROOMPEARL	44.066	35.0047	0.326335	0.618833	0.054831	Unclassified	0.618833	Admixed
PI221738	A20-4INBREDHICKORYKING	24.2213	39.2028	0.318329	0.562932	0.11874	Unclassified	0.562932	Admixed
PI221739	A21-4-1INBREDHICKORYKING	21.8193	39.1185	0.327802	0.547286	0.124912	Unclassified	0.547286	Admixed
PI221743	N72-3-1-1INBRED	43.3801	16.3309	0.576963	0.353617	0.06942	Unclassified	0.576963	Admixed
PI221747	E205-1-1-1INBREDS5SYN.ANVELD	37.3143	11.9406	0.509781	0.408235	0.081984	Unclassified	0.509781	Admixed
PI221750	E292-1-1-1INBS5SYNVELDXMINN.706	34.1792	20.8857	0.50326	0.418903	0.077837	Unclassified	0.50326	Admixed
PI221773	A415-1-3INBRED	38.4442	50.0016	0.221233	0.697403	0.081364	Unclassified	0.697403	Admixed
PI221775	A436-1INBRED	31.7819	40.4562	0.363198	0.551442	0.085359	Unclassified	0.551442	Admixed
PI221788	E680-2-1-3S5INBRED	33.5779	30.8527	0.329448	0.586948	0.083604	Unclassified	0.586948	Admixed
PI221789	E683-1-2-1S5INBRED	39.1708	52.083	0.223918	0.709174	0.066908	Unclassified	0.709174	Subpopulation2
PI221790	E684-1-1-1S5INBRED	40.9149	35.4485	0.346591	0.592537	0.060871	Unclassified	0.592537	Admixed
PI221794	E697-1-1-1S5INBRED	50.675	43.2239	0.16962	0.789269	0.041111	Unclassified	0.789269	Subpopulation2
PI221797	F755-2-2-1S4INBREDTEKO	34.5451	47.5591	0.170784	0.748617	0.0806	Unclassified	0.748617	Subpopulation2
PI221804	A242-2S10INBREDPERUVIAN	53.1911	48.0108	0.165308	0.79509	0.039602	Unclassified	0.79509	Subpopulation2
PI221805	A243-1-2S10INBREDPERUVIAN	58.2004	67.9425	1e-06	0.972719	0.02728	Unclassified	0.972719	Subpopulation2
PI221813	A325-1S10INBREDHOTNOT	59.1589	60.4792	0.078172	0.90181	0.020018	Unclassified	0.90181	Subpopulation2
PI221817	A413-3A-1-1S10INBREDROBYN	45.2764	55.882	0.207664	0.737402	0.054934	Unclassified	0.737402	Subpopulation2
PI221820	C410-1F11INBREDHOTNOTCROSSES	57.1841	42.5032	0.212874	0.763849	0.023277	Unclassified	0.763849	Subpopulation2
PI221821	E680-3-1-1S6INBRED	35.0324	32.2164	0.301999	0.613869	0.084132	Unclassified	0.613869	Admixed
PI221822	E783-1-2-1S6STS.4222INBRED	46.565	45.2166	0.141142	0.820127	0.038731	Unclassified	0.820127	Subpopulation2
PI236997	Inbred6-907	43.7257	30.0949	0.375675	0.572256	0.05207	Unclassified	0.572256	Admixed
PI257506	F2	50.7023	46.7549	0.272597	0.696702	0.030701	Unclassified	0.696702	Admixed
PI257507	F7	52.9927	54.2918	0.217696	0.755754	0.02655	Unclassified	0.755754	Subpopulation2
PI257508	F10	43.9594	41.0176	0.324054	0.60643	0.069516	Unclassified	0.60643	Admixed
PI257513	F115	15.1073	25.4657	0.640585	0.212773	0.146642	Unclassified	0.640585	Admixed
PI257514	FV181	23.4402	26.0344	0.437381	0.438796	0.123823	Unclassified	0.438796	Admixed
PI257515	F431	41.6193	37.8474	0.337148	0.609278	0.053575	Unclassified	0.609278	Admixed
PI267164	CR2INBRED	30.4001	12.4357	0.695135	0.216134	0.088732	Unclassified	0.695135	Admixed
PI267165	CR22INBRED	29.4577	5.93276	0.618552	0.293971	0.087476	Unclassified	0.618552	Admixed
PI267166	2KM368INBRED	25.7197	19.877	0.572283	0.328117	0.0996	Unclassified	0.572283	Admixed
PI267167	T8144INBRED	32.7753	10.5981	0.633029	0.285088	0.081882	Unclassified	0.633029	Admixed
PI267168	T8146INBRED	27.4135	9.64022	0.634074	0.266685	0.099241	Unclassified	0.634074	Admixed
PI267169	T8302INBRED	46.7932	26.0478	0.455637	0.505737	0.038626	Unclassified	0.505737	Admixed
PI267170	T8354INBRED	45.0224	19.443	0.618779	0.331721	0.0495	Unclassified	0.618779	Admixed
PI267171	T8445INBRED	48.5827	-0.908166	0.695926	0.261891	0.042183	Unclassified	0.695926	Admixed
PI270297	B96	50.0592	72.2952	0.000421	0.938995	0.060584	Unclassified	0.938995	Subpopulation2
PI303924	NO.380	40.7995	28.1275	0.384895	0.554833	0.060272	Unclassified	0.554833	Admixed
PI303925	NO.1004INBRED	19.7517	10.2788	0.648653	0.225741	0.125606	Unclassified	0.648653	Admixed
PI303926	NO.1019INBRED	44.2335	10.5259	0.521456	0.411093	0.067451	Unclassified	0.521456	Admixed
PI303928	NO.1032INBRED	23.0852	16.9733	0.604131	0.285235	0.110634	Unclassified	0.604131	Admixed
PI303929	NO.1037INBRED	29.9219	6.09635	0.658189	0.251401	0.09041	Unclassified	0.658189	Admixed
PI303930	NO.1049INBRED	28.785	15.4836	0.624152	0.272967	0.102881	Unclassified	0.624152	Admixed
PI303932	NO.1068INBRED	28.8584	26.7278	0.554063	0.349094	0.096844	Unclassified	0.554063	Admixed
PI303933	NO.1070INBRED	66.1784	54.3661	0.12484	0.872024	0.003135	Unclassified	0.872024	Subpopulation2
PI303936	NO.1174INBRED	52.325	64.8914	0.058774	0.905634	0.035592	Unclassified	0.905634	Subpopulation2
PI303937	NO.1175INBRED	48.8052	70.5392	1e-06	0.941941	0.058059	Unclassified	0.941941	Subpopulation2
PI303938	NO.1185INBRED	38.8745	37.2287	0.311387	0.609563	0.07905	Unclassified	0.609563	Admixed
PI303939	NO.1197INBRED	61.7822	80.1684	1e-06	0.999997	2e-06	Unclassified	0.999997	Subpopulation2
PI303940	NO.1201INBRED	59.7256	71.3311	0.0079	0.979328	0.012772	Unclassified	0.979328	Subpopulation2
PI303941	NO.1266INBRED	21.6127	27.313	0.493312	0.389274	0.117414	Unclassified	0.493312	Admixed
PI303943	TN53-1-2	60.5778	69.6064	0.068112	0.928582	0.003306	Unclassified	0.928582	Subpopulation2
PI303944	TN50-14-1	66.8254	65.7821	0.069137	0.930862	1e-06	Unclassified	0.930862	Subpopulation2
PI340812	NY121NevehYaar	31.6477	11.7872	0.496867	0.414104	0.089028	Unclassified	0.496867	Admixed
PI340813	NY123NevehYaar	31.633	7.44747	0.710505	0.203366	0.086129	Unclassified	0.710505	Subpopulation1
PI340817	G3T5	40.7284	34.1669	0.38663	0.553344	0.060026	Unclassified	0.553344	Admixed
PI340818	G3T5a	38.1452	33.6364	0.378714	0.552471	0.068815	Unclassified	0.552471	Admixed
PI340819	T9	37.2742	37.397	0.370832	0.549227	0.079941	Unclassified	0.549227	Admixed
PI340820	T14F	50.7599	50.0222	0.175054	0.785337	0.039609	Unclassified	0.785337	Subpopulation2
PI340822	G6T123	43.5028	34.8621	0.409147	0.532287	0.058567	Unclassified	0.532287	Admixed
PI340824	G15T134	44.7892	28.1167	0.440907	0.48507	0.074023	Unclassified	0.48507	Admixed
PI340825	G15T134a	40.7011	26.6013	0.398449	0.515525	0.086026	Unclassified	0.515525	Admixed
PI340826	T140	57.2752	41.1834	0.27003	0.706597	0.023373	Unclassified	0.706597	Subpopulation2
PI340827	T141	37.4665	21.0674	0.502933	0.424117	0.07295	Unclassified	0.502933	Admixed
PI340829	T146	62.0964	58.3783	0.081704	0.904007	0.014289	Unclassified	0.904007	Subpopulation2
PI340830	T242	27.2475	26.2943	0.479155	0.426877	0.093967	Unclassified	0.479155	Admixed
PI343953	PLS61/10870subline-1	38.3295	16.6023	0.695491	0.219565	0.084944	Unclassified	0.695491	Admixed
PI369437	80-2	58.6029	6.86525	0.516372	0.46765	0.015978	Unclassified	0.516372	Admixed
PI369438	K10	21.751	-8.97819	0.757792	0.139262	0.102947	Unclassified	0.757792	Subpopulation1
PI369439	S14	39.9873	34.38	0.401806	0.53353	0.064664	Unclassified	0.53353	Admixed
PI369442	S48	34.2168	7.86763	0.739483	0.165691	0.094827	Unclassified	0.739483	Subpopulation1
PI369443	S61	27.9938	19.075	0.729051	0.147741	0.123208	Unclassified	0.729051	Subpopulation1
PI369446	U123	39.7638	21.348	0.521382	0.392443	0.086175	Unclassified	0.521382	Admixed
PI391414	PH9	-7.33124	-42.4934	0.761241	1e-06	0.238758	Unclassified	0.761241	Subpopulation1
PI391662	KUNG-70	38.4772	18.6121	0.616557	0.320918	0.062525	Unclassified	0.616557	Admixed
PI391663	TIEH84	48.1822	30.8744	0.474994	0.475343	0.049664	Unclassified	0.475343	Admixed
PI391666	YING-64	41.8203	22.2691	0.402586	0.53067	0.066744	Unclassified	0.53067	Admixed
PI391670	NIU11	52.0143	65.7494	0.066234	0.896918	0.036848	Unclassified	0.896918	Subpopulation2
PI391672	YANG	69.0261	88.6845	1e-06	0.999999	1e-06	Unclassified	0.999999	Subpopulation2
PI391676	TUO229	59.0491	82.4283	1e-06	0.99037	0.009629	Unclassified	0.99037	Subpopulation2
PI391678	TZU-CHIAO-HSI-WU105	52.24	42.682	0.18322	0.786604	0.030177	Unclassified	0.786604	Subpopulation2
PI391682	YE-CHI-HUNG	65.7232	84.729	1e-06	0.999999	1e-06	Unclassified	0.999999	Subpopulation2
PI405705	CHAN11INBRED	56.4026	0.661416	0.543254	0.44035	0.016396	Unclassified	0.543254	Admixed
PI405707	HUA94INBRED	48.2045	33.7503	0.308891	0.648197	0.042913	Unclassified	0.648197	Admixed
PI405709	TANGCHAOINBRED	51.4643	58.6653	0.178635	0.803169	0.018196	Unclassified	0.803169	Subpopulation2
PI405713	DAJINDINGJI0018	54.6513	53.9363	0.181518	0.788804	0.029678	Unclassified	0.788804	Subpopulation2
PI405714	HUOBAOMIJI0235	62.9197	60.3975	0.135171	0.862998	0.001831	Unclassified	0.862998	Subpopulation2
PI406106	A14NW	50.6156	-59.1577	0.989829	1e-06	0.010171	Unclassified	0.989829	Subpopulation1
PI406107	A57N	50.4248	-58.1508	0.986841	0.001189	0.01197	Unclassified	0.986841	Subpopulation1
PI406108	A98NW	57.3597	-44.6402	0.889397	0.101905	0.008699	Unclassified	0.889397	Subpopulation1
PI406110	A178N	67.5781	-141.303	0.992606	1e-06	0.007393	Unclassified	0.992606	Subpopulation1
PI406112		-105.103	51.222	0.006155	0.356193	0.637652	Unclassified	0.637652	Admixed
PI406116	A347NW	41.8719	48.2965	0.201449	0.735093	0.063458	Unclassified	0.735093	Subpopulation2
PI406118	A509N	-57.1295	5.39994	0.485552	0.046808	0.46764	Unclassified	0.485552	Admixed
PI406119	A553NOrangeHalo	-39.0058	22.969	0.373733	0.247484	0.378783	Unclassified	0.378783	Admixed
PI406120	A553NRedhalo	-29.914	23.8748	0.284752	0.375378	0.33987	Unclassified	0.375378	Admixed
PI406122	A564N	-27.2346	2.34308	0.729933	1e-06	0.270066	Unclassified	0.729933	Subpopulation1
PI406123	A579N	-26.5542	7.43899	0.700182	0.027846	0.271972	Unclassified	0.700182	Subpopulation1
PI406124	A622N	41.0273	29.0382	0.450199	0.480735	0.069066	Unclassified	0.480735	Admixed
PI406125	A641N	-202.7	42.5452	1e-06	1e-06	0.999999	Stiff stalk	0.999999	Subpopulation3
PI406127	A664N	-189.328	40.4458	0.004348	0.059499	0.936154	Unclassified	0.936154	Subpopulation3
PI406128	A691N	34.4325	-17.7608	0.824987	0.088653	0.086361	Unclassified	0.824987	Subpopulation1
PI406129	A759NW	40.8931	33.5001	0.301903	0.639616	0.058482	Unclassified	0.639616	Admixed
PI406130	A797NW	38.0526	28.5649	0.326178	0.60076	0.073062	Unclassified	0.60076	Admixed
PI406131		38.7304	28.0262	0.324681	0.604284	0.071035	Unclassified	0.604284	Admixed
PI415079	4537.INBRED	47.9077	42.9402	0.332278	0.619135	0.048587	Unclassified	0.619135	Admixed
PI415080	4550.INBRED	44.4403	44.0331	0.23561	0.712461	0.051929	Unclassified	0.712461	Subpopulation2
PI415081	4554.INBRED	44.2044	43.5933	0.266388	0.685065	0.048548	Unclassified	0.685065	Admixed
PI415082	4554INBRED	55.8982	44.0176	0.255769	0.730696	0.013535	Unclassified	0.730696	Subpopulation2
PI415083	4562INBRED	56.3455	46.4795	0.240345	0.748026	0.011629	Unclassified	0.748026	Subpopulation2
PI415084	4564INBRED	49.6593	39.9125	0.288385	0.675041	0.036574	Unclassified	0.675041	Admixed
PI415085	4566INBRED	44.0301	52.9793	0.313239	0.644276	0.042484	Unclassified	0.644276	Admixed
PI415086	4578INBRED	68.8769	-43.4938	0.505876	0.494123	1e-06	Unclassified	0.505876	Admixed
PI415087	4580INBRED	70.2621	-41.1422	0.487207	0.512792	1e-06	Unclassified	0.512792	Admixed
PI415088	4581INBRED	70.5206	-40.0801	0.490355	0.509645	1e-06	Unclassified	0.509645	Admixed
PI415089	4655INBRED	37.1389	36.3407	0.366803	0.557356	0.075841	Unclassified	0.557356	Admixed
PI415090	4659INBRED	44.9799	30.7438	0.41091	0.542951	0.046139	Unclassified	0.542951	Admixed
PI415091	4664INBRED	47.4488	32.085	0.401507	0.554843	0.043649	Unclassified	0.554843	Admixed
PI427109	Eng-liChih	32.802	29.7787	0.37441	0.529163	0.096427	Unclassified	0.529163	Admixed
PI427111	Chi-tan120	25.2699	20.6152	0.584697	0.30833	0.106974	Unclassified	0.584697	Admixed
PI433486	PriorB	25.127	10.6474	0.562482	0.30036	0.137157	Unclassified	0.562482	Admixed
PI433487	PriorC	42.5044	30.5914	0.40297	0.536304	0.060726	Unclassified	0.536304	Admixed
PI459078	Honno.7	37.7416	1.02711	0.387498	0.543835	0.068667	Unclassified	0.543835	Admixed
PI459080	Hwangno.525	56.1009	51.1891	0.219849	0.767939	0.012212	Unclassified	0.767939	Subpopulation2
PI459082	Shansino.60	65.9074	82.4624	1e-06	0.999999	1e-06	Unclassified	0.999999	Subpopulation2
PI506243	Tzi1	59.9719	58.6802	1e-06	0.995237	0.004762	Tropical	0.995237	Subpopulation2
PI506245	Tzi4	62.8098	57.4008	0.002483	0.989369	0.008149	Tropical	0.989369	Subpopulation2
PI506247	Tzi9	60.4158	67.3341	1e-06	0.991081	0.008918	Tropical	0.991081	Subpopulation2
PI506249	Tzi12	30.1106	35.7155	0.162417	0.744634	0.092949	Tropical	0.744634	Subpopulation2
PI506250	Tzi13	33.6019	53.9703	0.044696	0.854633	0.100671	Tropical	0.854633	Subpopulation2
PI506251	Tzi15	39.5341	53.2242	0.085741	0.849364	0.064896	Tropical	0.849364	Subpopulation2
PI506253	Tzi18	62.3537	72.0722	1e-06	0.999999	1e-06	Tropical	0.999999	Subpopulation2
PI506254	Tzi24	51.3629	-9.95171	0.619328	0.351011	0.029661	Tropical	0.619328	Admixed
PI506256	Tzi27	23.4514	23.5149	0.270601	0.600519	0.12888	Tropical	0.600519	Admixed
PI506257	Tzi28	24.711	34.1603	0.335612	0.532286	0.132102	Tropical	0.532286	Admixed
PI506258	Tzi30	14.0938	47.0676	0.087254	0.752228	0.160518	Tropical	0.752228	Subpopulation2
PI508277	SD42	-1.38177	36.556	0.489948	0.305201	0.204851	Unclassified	0.489948	Admixed
PI509542	B89	-43.1343	-10.991	0.61341	0.032032	0.354558	Stiff stalk	0.61341	Admixed
PI510674	ND261	32.5261	25.8423	0.648565	0.277713	0.073723	Unclassified	0.648565	Admixed
PI511309	NC252	-301.615	-43.2125	0	0	0.999999	Stiff stalk	0.999999	Subpopulation3
PI511310	NC254	-285.646	-42.1507	0	0	0.999999	Stiff stalk	0.999999	Subpopulation3
PI511311	NC256	-292.038	-41.9076	0	0	0.999999	Stiff stalk	0.999999	Subpopulation3
PI511313	GT113	20.4762	38.7744	0.298274	0.570178	0.131548	Unclassified	0.570178	Admixed
PI511318	GT119	49.5201	22.2073	0.434091	0.526153	0.039756	Unclassified	0.526153	Admixed
PI511804	T165	26.9825	42.5023	0.345192	0.554962	0.099846	Unclassified	0.554962	Admixed
PI511805	T167	66.8268	-80.7336	0.675365	0.323659	0.000977	Unclassified	0.675365	Admixed
PI517968	Pa392	16.4123	26.0349	0.552156	0.31328	0.134564	Non-stiff stalk	0.552156	Admixed
PI517971	Pa468	37.1276	17.1945	0.655267	0.289572	0.055161	Unclassified	0.655267	Admixed
PI517972	Pa877	19.7779	10.8258	0.713988	0.172266	0.113746	Stiff stalk	0.713988	Subpopulation1
PI517973	Pa879	38.8794	-6.72319	0.65529	0.271661	0.07305	Stiff stalk	0.65529	Admixed
PI517974	Pa880	32.6599	11.4021	0.566982	0.348665	0.084353	Unclassified	0.566982	Admixed
PI518660	SD43	15.0528	21.4326	0.541923	0.310736	0.147341	Unclassified	0.541923	Admixed
PI520770	W552	43.5843	-22.9802	0.844008	0.106624	0.049368	Unclassified	0.844008	Subpopulation1
PI520771	W570	-128.485	38.6726	0.244888	0.062059	0.693053	Unclassified	0.693053	Admixed
PI520772	W572	-84.3758	6.71561	0.478177	1e-06	0.521822	Unclassified	0.521822	Admixed
PI520774	NC264	53.0121	39.4575	0.178684	0.793963	0.027353	Non-stiff stalk	0.793963	Subpopulation2
PI522250	ND262	21.7329	2.55139	0.643936	0.234063	0.122001	Unclassified	0.643936	Admixed
PI524969	SD44	29.2983	-0.160197	0.821518	0.110398	0.068083	Unclassified	0.821518	Subpopulation1
PI524970	SD46	-15.3515	-16.0739	0.773646	1e-06	0.226353	Unclassified	0.773646	Subpopulation1
PI527699	B90	26.6432	11.3483	0.662771	0.236062	0.101167	Non-stiff stalk	0.662771	Admixed
PI527700	B91	14.2025	6.59907	0.690955	0.160982	0.148064	Non-stiff stalk	0.690955	Admixed
PI531081	Pa356	-8.47245	1.61366	0.566989	0.197899	0.235113	Non-stiff stalk	0.566989	Admixed
PI531082	Pa376	30.7465	18.5684	0.589	0.308966	0.102034	Non-stiff stalk	0.589	Admixed
PI531083	Pa891	47.895	-27.5513	0.964292	1e-06	0.035708	Non-stiff stalk	0.964292	Subpopulation1
PI531084	NC258	50.8293	-97.3544	0.921682	0.043575	0.034743	Unclassified	0.921682	Subpopulation1
PI531085	NC262	54.3711	-82.2923	0.821939	0.137363	0.040697	Unclassified	0.821939	Subpopulation1
PI531509	R225	-7.4654	-20.525	0.75399	0.022437	0.223573	Unclassified	0.75399	Subpopulation1
PI531510	R226	-15.7928	9.05343	0.596843	0.121016	0.282141	Unclassified	0.596843	Admixed
PI531511	R227	-52.0463	-15.0496	0.620843	0	0.379156	Unclassified	0.620843	Admixed
PI533658	SD101	-18.6274	-20.8096	0.696201	0.001308	0.302491	Unclassified	0.696201	Admixed
PI533659	SD102	-5.78881	-18.9173	0.798306	1e-06	0.201693	Unclassified	0.798306	Subpopulation1
PI535900	S2	58.5974	38.6467	0.281991	0.707677	0.010333	Unclassified	0.707677	Subpopulation2
PI535901	S3	39.8602	38.2932	0.350831	0.57953	0.069639	Unclassified	0.57953	Admixed
PI535906	S56	47.9507	48.5765	0.284417	0.676825	0.038758	Unclassified	0.676825	Admixed
PI535912		31.6611	21.5225	0.723708	0.169449	0.106843	Unclassified	0.723708	Subpopulation1
PI535913	S17	46.5503	35.0017	0.425457	0.53436	0.040183	Unclassified	0.53436	Admixed
PI535914	S22	18.948	19.5606	0.511738	0.357507	0.130754	Unclassified	0.511738	Admixed
PI535916	S37	36.2695	3.65482	0.786477	0.146389	0.067134	Unclassified	0.786477	Subpopulation1
PI535917	S51	24.743	17.5387	0.664212	0.207448	0.12834	Unclassified	0.664212	Admixed
PI535919	S59A	9.63967	16.4637	0.481963	0.347783	0.170254	Unclassified	0.481963	Admixed
PI535921	S65	40.9282	30.7448	0.44644	0.498061	0.055499	Unclassified	0.498061	Admixed
PI535923	S90	35.9224	24.6877	0.546168	0.371768	0.082063	Unclassified	0.546168	Admixed
PI535924	S97	29.7446	7.84584	0.605818	0.301907	0.092275	Unclassified	0.605818	Admixed
PI535925	S99	11.1606	17.5713	0.460961	0.376559	0.162481	Unclassified	0.460961	Admixed
PI535926	S117	23.5792	8.12309	0.745121	0.142755	0.112125	Unclassified	0.745121	Subpopulation1
PI535927	S125	10.2607	5.56367	0.557869	0.283824	0.158308	Unclassified	0.557869	Admixed
PI537097	LH195	-218.233	-47.3831	0.081429	0	0.91857	Stiff stalk	0.91857	Subpopulation3
PI537099	LH205	-264.819	-18.8282	0	0	0.999999	Stiff stalk	0.999999	Subpopulation3
PI538007	LH127	55.7616	-138.808	0.978086	1e-06	0.021913	Non-stiff stalk	0.978086	Subpopulation1
PI538008	LH163	-20.9334	8.43502	0.663998	0.050671	0.285331	Unclassified	0.663998	Admixed
PI538009	LH196	-283.829	-37.7649	0	1e-06	0.999999	Stiff stalk	0.999999	Subpopulation3
PI538010	LH206	-242.862	-26.7838	0.009387	0	0.990613	Unclassified	0.990613	Subpopulation3
PI538011	LH220Ht	-195.809	6.52292	0.04776	1e-06	0.95224	Stiff stalk	0.95224	Subpopulation3
PI538231	SD59	40.0337	-30.749	0.822468	0.128155	0.049376	Unclassified	0.822468	Subpopulation1
PI538235	SD57	34.3047	22.7371	0.572524	0.338037	0.089439	Unclassified	0.572524	Admixed
PI538237	SD63	-103.825	40.5658	0.343731	0.030968	0.625302	Unclassified	0.625302	Admixed
PI538238	SD65	59.148	12.6005	0.762819	0.219857	0.017325	Unclassified	0.762819	Subpopulation1
PI538239	SD69	-116.165	32.4453	0.242568	0.106953	0.650479	Unclassified	0.650479	Admixed
PI538242	SD106	28.1665	3.51408	0.732041	0.169933	0.098026	Unclassified	0.732041	Subpopulation1
PI538244	SD108	-234.597	-35.2839	0.064054	0.03975	0.896196	Unclassified	0.896196	Subpopulation3
PI539870	B92	75.6124	-150.791	0.999999	1e-06	1e-06	Non-stiff stalk	0.999999	Subpopulation1
PI539871	B93	54.874	-63.6586	0.951738	0.027994	0.020267	Non-stiff stalk	0.951738	Subpopulation1
PI539872	B94	-40.1419	-2.27191	0.646521	0.005821	0.347659	Stiff stalk	0.646521	Admixed
PI539920	LH160	48.7816	-93.7078	0.846522	0.100593	0.052885	Unclassified	0.846522	Subpopulation1
PI539921	LH162	39.857	-53.1602	0.670705	0.266262	0.063033	Unclassified	0.670705	Admixed
PI539922	LH190	-252.759	-26.5874	1e-06	0	0.999999	Stiff stalk	0.999999	Subpopulation3
PI539923	LH194	-193.328	-34.7809	0.158672	0.02853	0.812798	Stiff stalk	0.812798	Subpopulation3
PI539924	LH202	-275.327	-40.1835	0	0	0.999999	Stiff stalk	0.999999	Subpopulation3
PI539925	LH191	-151.86	-44.4961	0.285052	1e-06	0.714947	Unclassified	0.714947	Subpopulation3
PI539926	LH192	-198.948	-14.9357	0.031935	0.144628	0.823436	Stiff stalk	0.823436	Subpopulation3
PI539927	LH193	-239.575	-17.5098	0	0.046037	0.953963	Stiff stalk	0.953963	Subpopulation3
PI539930	RS710	-31.0732	25.7555	0.489617	0.185168	0.325215	Unclassified	0.489617	Admixed
PI540743	Tzi6	32.4824	37.0081	0.147594	0.75279	0.099616	Tropical	0.75279	Subpopulation2
PI540744	Tzi7	67.7715	69.1406	1e-06	0.999999	1e-06	Tropical	0.999999	Subpopulation2
PI540745	Tzi11	45.6981	53.2079	0.105134	0.834728	0.060137	Tropical	0.834728	Subpopulation2
PI540747	Tzi16	31.8281	37.5526	0.156547	0.740188	0.103266	Tropical	0.740188	Subpopulation2
PI540749	Tzi22	67.6588	-61.6849	0.396272	0.603727	1e-06	Tropical	0.603727	Admixed
PI542941	SC84	30.3472	41.0961	0.329411	0.569978	0.100611	Unclassified	0.569978	Admixed
PI542942	SC155	50.1503	42.2624	0.229907	0.734015	0.036078	Unclassified	0.734015	Subpopulation2
PI542944	SC301	41.9443	17.7054	0.453382	0.473666	0.072952	Unclassified	0.473666	Admixed
PI542946	SC359	28.0323	37.4425	0.26538	0.617785	0.116836	Unclassified	0.617785	Admixed
PI542948	T204	39.1253	33.546	0.459401	0.473036	0.067563	Unclassified	0.473036	Admixed
PI542952	T252	46.4518	-41.8702	0.572896	0.350043	0.077061	Unclassified	0.572896	Admixed
PI542953	T264	18.9093	6.2718	0.586014	0.28716	0.126827	Unclassified	0.586014	Admixed
PI542955	Va4	40.8333	21.1579	0.475085	0.460237	0.064679	Unclassified	0.475085	Admixed
PI542957	Va6	30.9771	18.1697	0.433883	0.462997	0.10312	Unclassified	0.462997	Admixed
PI542958	Va10	19.2236	7.91279	0.460662	0.410804	0.128534	Unclassified	0.460662	Admixed
PI542959	Va33	29.0452	11.6328	0.547565	0.370029	0.082406	Unclassified	0.547565	Admixed
PI543008	NC201	38.6887	22.3234	0.461137	0.456754	0.082109	Unclassified	0.461137	Admixed
PI543843	PHN34	25.5907	6.73051	0.645949	0.251216	0.102835	Unclassified	0.645949	Admixed
PI543846	PHP76	28.4146	-8.27285	0.907151	0	0.092848	Unclassified	0.907151	Subpopulation1
PI543847	PHV07	-84.7939	-13.6041	0.404681	0.03778	0.557539	Unclassified	0.557539	Admixed
PI543849	PHW51	-105.797	-10.9964	0.252676	0.079048	0.668276	Unclassified	0.668276	Admixed
PI543850	PHW86	-42.2009	4.2627	0.670949	1e-06	0.32905	Unclassified	0.670949	Admixed
PI543916	Mp339	36.0389	39.9141	0.216714	0.690053	0.093233	Unclassified	0.690053	Admixed
PI544065	BCC03	65.6146	-131.677	0.915342	0.075184	0.009474	Unclassified	0.915342	Subpopulation1
PI546482	FBLA	-112.797	34.1258	0.31331	0.05909	0.6276	Unclassified	0.6276	Admixed
PI546483	6F629	-138.939	1.44101	0.280078	1e-06	0.719921	Unclassified	0.719921	Subpopulation3
PI546484	6M502A	54.2318	-59.6275	0.888252	0.074116	0.037632	Unclassified	0.888252	Subpopulation1
PI546485	NL001	-243.483	-1.70092	1e-06	1e-06	0.999999	Unclassified	0.999999	Subpopulation3
PI546494	ND265	3.95382	16.047	0.55494	0.239071	0.205989	Unclassified	0.55494	Admixed
PI547086	LH128	70.4819	-162.009	0.891605	0.100295	0.008101	Non-stiff stalk	0.891605	Subpopulation1
PI547087	LH181	69.2378	-175.386	0.999999	1e-06	0	Unclassified	0.999999	Subpopulation1
PI547088	LH208	-200.55	-0.758879	0.104928	1e-06	0.895071	Stiff stalk	0.895071	Subpopulation3
PI547089	LH212Ht	48.2001	-134.876	0.974803	1e-06	0.025197	Unclassified	0.974803	Subpopulation1
PI547090	LH213	58.5629	-185.212	0.999999	0	1e-06	Non-stiff stalk	0.999999	Subpopulation1
PI547107	Lp215D	71.6483	-200.474	0.999999	1e-06	1e-06	Unclassified	0.999999	Subpopulation1
PI548783	T171	-239.795	-31.3101	0.011212	0.060411	0.928378	Unclassified	0.928378	Subpopulation3
PI548788	GT106	49.7795	27.0391	0.41676	0.535619	0.04762	Unclassified	0.535619	Admixed
PI548790	SC91	36.9399	34.6321	0.26448	0.645515	0.090004	Unclassified	0.645515	Admixed
PI548794	ND266	30.1651	4.76978	0.799489	0.101827	0.098684	Unclassified	0.799489	Subpopulation1
PI548798	PHJ89	47.478	-61.2039	0.989133	1e-06	0.010866	Unclassified	0.989133	Subpopulation1
PI548799	PHJ90	29.8903	-15.192	0.958493	1e-06	0.041507	Unclassified	0.958493	Subpopulation1
PI548801	PHM81	0.290721	12.9469	0.80061	0.01461	0.18478	Unclassified	0.80061	Subpopulation1
PI548802	PHN66	-73.4174	-15.3306	0.416109	0.088766	0.495126	Stiff stalk	0.495126	Admixed
PI548805	PHR58	54.8607	-58.1806	0.922036	0.052184	0.02578	Non-stiff stalk	0.922036	Subpopulation1
PI548808	PHW30	43.2077	-33.7967	0.978262	1e-06	0.021737	Unclassified	0.978262	Subpopulation1
PI548830	29MIBZ2	40.8367	-19.5735	0.992101	1e-06	0.007898	Unclassified	0.992101	Subpopulation1
PI550440	B64	-116.321	55.6082	0.000223	0.298109	0.701668	Unclassified	0.701668	Subpopulation3
PI550441	Mo18W	54.4116	59.8663	0.150257	0.825636	0.024107	Unclassified	0.825636	Subpopulation2
PI550442	Mo20W	40.1973	36.4355	0.342679	0.595495	0.061827	Non-stiff stalk	0.595495	Admixed
PI550443	B49	38.3262	16.7872	0.492438	0.415738	0.091824	Unclassified	0.492438	Admixed
PI550455	B67	-53.2883	-7.38463	0.570628	0.010524	0.418848	Stiff stalk	0.570628	Admixed
PI550456	B69	-128.739	29.6139	0.292662	0.016028	0.69131	Unclassified	0.69131	Admixed
PI550461	B14A	-217.258	44.1067	0	0	0.999999	Stiff stalk	0.999999	Subpopulation3
PI550462	B59	-172.122	46.1299	0.114989	1e-06	0.885011	Stiff stalk	0.885011	Subpopulation3
PI550463	B65	31.9296	1.26477	0.778789	0.128615	0.092596	Stiff stalk	0.778789	Subpopulation1
PI550464	B66	54.4526	-34.7059	0.926887	0.067533	0.00558	Non-stiff stalk	0.926887	Subpopulation1
PI550465	B68	-148.315	53.0481	0.000653	0.136275	0.863072	Stiff stalk	0.863072	Subpopulation3
PI550466	B70	73.9357	-160.44	0.999999	1e-06	1e-06	Non-stiff stalk	0.999999	Subpopulation1
PI550467	B37	-62.3669	0.367145	0.50489	1e-06	0.495109	Stiff stalk	0.50489	Admixed
PI550468	B45	-16.6725	16.4493	0.678933	0.057976	0.26309	Unclassified	0.678933	Admixed
PI550469	B46	-16.0666	8.77537	0.684445	0.053934	0.26162	Unclassified	0.684445	Admixed
PI550470	B54	39.3878	14.6412	0.702639	0.223574	0.073787	Unclassified	0.702639	Subpopulation1
PI550471	B56	30.5236	7.52353	0.629376	0.278106	0.092518	Unclassified	0.629376	Admixed
PI550472	B57	35.6704	17.626	0.559735	0.358593	0.081672	Non-stiff stalk	0.559735	Admixed
PI550473	B73	-305.393	-44.2941	0	0	0.999999	Stiff stalk	0.999999	Subpopulation3
PI550483	B76	-45.2665	-3.7133	0.477859	0.095931	0.42621	Stiff stalk	0.477859	Admixed
PI550489	ND245	39.0731	12.8401	0.588081	0.361595	0.050324	Unclassified	0.588081	Admixed
PI550490	ND246	38.7426	12.722	0.58866	0.360117	0.051222	Unclassified	0.58866	Admixed
PI550491	ND301	21.5861	13.3588	0.632799	0.240341	0.12686	Unclassified	0.632799	Admixed
PI550496	H102	54.0333	-42.223	0.567429	0.411932	0.020639	Unclassified	0.567429	Admixed
PI550497	H103	28.9172	33.7547	0.475704	0.40728	0.117016	Unclassified	0.475704	Admixed
PI550503	ND247	27.5853	30.2463	0.587694	0.304344	0.107962	Unclassified	0.587694	Admixed
PI550504	ND248	-1.41274	10.4371	0.63206	0.126788	0.241152	Unclassified	0.63206	Admixed
PI550514	T61	24.8409	27.7685	0.372581	0.492465	0.134954	Unclassified	0.492465	Admixed
PI550516	T111	33.4475	31.2553	0.496639	0.421119	0.082242	Unclassified	0.496639	Admixed
PI550517	T115	29.357	23.8631	0.430953	0.465788	0.103259	Unclassified	0.465788	Admixed
PI550518	T8	47.0714	8.1062	0.551537	0.427757	0.020706	Unclassified	0.551537	Admixed
PI550519	T220	15.2399	35.5397	0.2893	0.548398	0.162302	Unclassified	0.548398	Admixed
PI550520	T224	29.7573	9.51202	0.593621	0.308121	0.098257	Unclassified	0.593621	Admixed
PI550521	T226	22.2629	-3.84584	0.871385	0.017694	0.110921	Unclassified	0.871385	Subpopulation1
PI550522	T232	15.133	36.5331	0.366402	0.478961	0.154637	Unclassified	0.478961	Admixed
PI550526	H110	-31.2836	46.2655	0.145216	0.505401	0.349383	Stiff stalk	0.505401	Admixed
PI550527	H111	-112.826	17.7055	0.126995	0.232829	0.640176	Stiff stalk	0.640176	Admixed
PI550530	ND249	38.5659	34.7431	0.53138	0.399579	0.069041	Unclassified	0.53138	Admixed
PI550531	ND250	28.8083	4.31416	0.634933	0.274747	0.09032	Unclassified	0.634933	Admixed
PI550532	ND251	34.8284	34.0437	0.533223	0.381771	0.085006	Unclassified	0.533223	Admixed
PI550534	Mp701	64.7939	80.5103	1e-06	0.999999	1e-06	Unclassified	0.999999	Subpopulation2
PI550541	ND253	26.4419	8.26912	0.68972	0.21373	0.09655	Unclassified	0.68972	Admixed
PI550542	ND254	34.1557	34.152	0.53194	0.382066	0.085995	Unclassified	0.53194	Admixed
PI550546	Mp705	62.4737	72.7347	1e-06	0.999999	1e-06	Unclassified	0.999999	Subpopulation2
PI550547	Mp706	63.2697	74.9169	1e-06	0.999999	1e-06	Unclassified	0.999999	Subpopulation2
PI550552	ND304W	-21.8914	27.2695	0.329713	0.417257	0.253031	Unclassified	0.417257	Admixed
PI550553	ND101	36.1714	16.4852	0.53467	0.38868	0.076651	Unclassified	0.53467	Admixed
PI550554	ND256	27.6757	6.93907	0.663921	0.212967	0.123112	Unclassified	0.663921	Admixed
PI550555	NC250	-17.7829	4.77489	0.327861	0.339703	0.332436	Stiff stalk	0.339703	Admixed
PI550556	B88	-34.0838	14.8883	0.567924	0.11776	0.314316	Unclassified	0.567924	Admixed
PI550558	DE811	-73.6204	-8.59662	0.268621	0.203427	0.527953	Unclassified	0.527953	Admixed
PI550559	T163	19.0105	50.1525	0.212112	0.635843	0.152045	Unclassified	0.635843	Admixed
PI550561	ND257	12.8532	-1.39169	0.763007	0.077591	0.159403	Unclassified	0.763007	Subpopulation1
PI550565	N190	-175.402	16.4518	0.160101	1e-06	0.839899	Stiff stalk	0.839899	Subpopulation3
PI550566	N192	-249.833	-17.2585	0.040302	0	0.959698	Stiff stalk	0.959698	Subpopulation3
PI550567	N193	48.6923	15.1403	0.538836	0.431425	0.029739	Unclassified	0.538836	Admixed
PI550568	N194	24.187	-2.14069	0.71812	0.182924	0.098956	Unclassified	0.71812	Subpopulation1
PI550571	ND259	46.1996	35.4154	0.424484	0.53375	0.041767	Unclassified	0.53375	Admixed
PI550573	ND260	27.1013	5.3561	0.653122	0.24096	0.105918	Unclassified	0.653122	Admixed
PI550574	GA203	38.962	17.0698	0.44528	0.490569	0.06415	Unclassified	0.490569	Admixed
PI550695	L155	-17.4515	0.946784	0.740053	1e-06	0.259947	Unclassified	0.740053	Subpopulation1
PI550901	88091	51.8388	59.194	0.015623	0.958032	0.026344	Tropical	0.958032	Subpopulation2
PI550908	89260	51.8759	64.8793	1e-06	0.965045	0.034954	Tropical	0.965045	Subpopulation2
PI550909	89291	58.4293	44.7019	0.102856	0.882278	0.014866	Tropical	0.882278	Subpopulation2
PI550911	89302	56.8742	58.5591	0.08968	0.893917	0.016404	Tropical	0.893917	Subpopulation2
PI550917	88094	51.175	51.5678	0.069664	0.903614	0.026722	Tropical	0.903614	Subpopulation2
PI550918	88069	57.2235	31.8649	0.240678	0.742654	0.016669	Tropical	0.742654	Subpopulation2
PI550919	88030	63.9902	64.5471	0.018791	0.977312	0.003897	Tropical	0.977312	Subpopulation2
PI550924	Z28	54.2572	56.5772	0.069545	0.905303	0.025152	Tropical	0.905303	Subpopulation2
PI552815	LH215	79.457	-152.96	0.999951	4.8e-05	1e-06	Non-stiff stalk	0.999951	Subpopulation1
PI553055	OC2	42.5044	17.9637	0.562727	0.384013	0.053259	Unclassified	0.562727	Admixed
PI553056	OC3	45.1261	37.2299	0.366887	0.590524	0.042589	Unclassified	0.590524	Admixed
PI553057	OC4	35.5552	-11.7833	0.97063	1e-06	0.029369	Unclassified	0.97063	Subpopulation1
PI553059	OC6	46.7942	26.1432	0.410793	0.553124	0.036083	Unclassified	0.553124	Admixed
PI553063	OC10	32.4462	16.8954	0.483133	0.434728	0.082139	Unclassified	0.483133	Admixed
PI554612	LH209	-269.433	-22.5537	0	0	0.999999	Unclassified	0.999999	Subpopulation3
PI554616	3IBZ2	33.0713	-23.1911	0.933167	0.004345	0.062488	Unclassified	0.933167	Subpopulation1
PI555650	LIBC4	40.161	-38.5381	0.98105	1e-06	0.018949	Unclassified	0.98105	Subpopulation1
PI555651	83IBI3	31.3452	-43.787	0.976933	1e-06	0.023067	Non-stiff stalk	0.976933	Subpopulation1
PI555660	LH214	56.8441	-185.615	0.999248	1e-06	0.000752	Unclassified	0.999248	Subpopulation1
PI558516	Mo7	45.0708	14.2561	0.510504	0.45095	0.038546	Unclassified	0.510504	Admixed
PI558517	Mo10	24.2473	23.8209	0.482947	0.41056	0.106493	Unclassified	0.482947	Admixed
PI558518	Mo15W	51.7069	17.9043	0.475245	0.494516	0.030239	Unclassified	0.494516	Admixed
PI558520	MO1W	43.0758	18.4524	0.727602	0.240565	0.031833	Unclassified	0.727602	Subpopulation1
PI558521	Mo2RF	40.5814	14.59	0.529096	0.404109	0.066795	Unclassified	0.529096	Admixed
PI558522	Mo3	6.80078	-2.73878	0.823941	0.003225	0.172835	Unclassified	0.823941	Subpopulation1
PI558523	Mo5	45.181	22.5606	0.523789	0.424543	0.051668	Unclassified	0.523789	Admixed
PI558524	Mo6	60.2393	-177.334	0.999371	1e-06	0.000629	Unclassified	0.999371	Subpopulation1
PI558525	Mo8W	51.3743	25.5779	0.509456	0.457814	0.032729	Unclassified	0.509456	Admixed
PI558526	Mo9W	37.7417	23.7654	0.470472	0.452082	0.077446	Unclassified	0.470472	Admixed
PI558527	Mo11	31.6897	-11.6828	0.923322	0.017904	0.058774	Unclassified	0.923322	Subpopulation1
PI558528	Mo12	43.9734	42.411	0.365717	0.585087	0.049195	Unclassified	0.585087	Admixed
PI558529	Mo13	46.8376	22.336	0.471295	0.503293	0.025412	Unclassified	0.503293	Admixed
PI558530	Mo14W	55.6086	57.4282	0.304741	0.682512	0.012747	Unclassified	0.682512	Admixed
PI558531	Mo16W	49.2184	21.8693	0.46265	0.495913	0.041437	Unclassified	0.495913	Admixed
PI558532	Mo17	95.1307	-296.897	0.999999	0	1e-06	Non-stiff stalk	0.999999	Subpopulation1
PI558533	Mo21R	64.8867	72.7379	1e-06	0.999999	1e-06	Unclassified	0.999999	Subpopulation2
PI558534	Mo22	70.5299	72.9074	1e-06	0.999999	1e-06	Unclassified	0.999999	Subpopulation2
PI559375	LH222	-211.704	-1.19454	0.084827	1e-06	0.915173	Unclassified	0.915173	Subpopulation3
PI559380	ICI193	-76.7898	29.2157	0.523777	1e-06	0.476222	Unclassified	0.523777	Admixed
PI559381	ICI441	-228.272	-49.8259	0.066847	1e-06	0.933152	Stiff stalk	0.933152	Subpopulation3
PI559382	ICI740	-228.525	-49.1834	0.066239	0	0.93376	Unclassified	0.93376	Subpopulation3
PI559383	ICI893	-190.822	-40.3273	0.180109	1e-06	0.81989	Unclassified	0.81989	Subpopulation3
PI559916	CS405	-147.494	-12.1414	0.210784	0.088131	0.701085	Unclassified	0.701085	Subpopulation3
PI559917	MQ305	-21.0792	4.02859	0.756699	1e-06	0.243301	Unclassified	0.756699	Subpopulation1
PI559918	NQ508	-13.4829	-18.8188	0.809494	1e-06	0.190505	Unclassified	0.809494	Subpopulation1
PI559919	OQ101	6.44801	5.67312	0.483827	0.312977	0.203196	Unclassified	0.483827	Admixed
PI559920	OQ403	-5.53317	-8.69633	0.81643	0	0.183569	Unclassified	0.81643	Subpopulation1
PI559921	OS602	-36.6866	11.8968	0.701295	1e-06	0.298705	Unclassified	0.701295	Subpopulation1
PI559944	PHP85	-168.282	-6.14391	0.172897	1e-06	0.827102	Unclassified	0.827102	Subpopulation3
PI559945	PHPR5	-90.9291	-16.6014	0.452745	0.002816	0.544439	Unclassified	0.544439	Admixed
PI559946	PHR30	-12.8188	-19.0603	0.649827	0.081309	0.268864	Unclassified	0.649827	Admixed
PI559949	PHT69	-17.5166	-33.8453	0.655747	0.065775	0.278478	Unclassified	0.655747	Admixed
PI559952	PHV53	37.6737	-9.96323	0.876333	0.061516	0.062151	Unclassified	0.876333	Subpopulation1
PI559953	PHVA9	-73.27	-26.3236	0.495076	0.064873	0.440051	Unclassified	0.495076	Admixed
PI559954	PHWG5	-169.017	-6.18818	0.170921	1e-06	0.829078	Unclassified	0.829078	Subpopulation3
PI560074	Pa759	-179.46	42.4483	0.034674	1e-06	0.965325	Unclassified	0.965325	Subpopulation3
PI560075	Pa760	-157.262	40.0676	0.13258	0.031975	0.835446	Unclassified	0.835446	Subpopulation3
PI560081	Pa778	20.6035	-107.274	0.862439	1e-06	0.137561	Non-stiff stalk	0.862439	Subpopulation1
PI560082	Pa860	35.8843	-21.7473	0.745281	0.178516	0.076203	Unclassified	0.745281	Subpopulation1
PI560316	CS608	-211.44	-13.7472	1e-06	0.04711	0.952889	Unclassified	0.952889	Subpopulation3
PI561515	AR202	42.55	38.2244	0.314592	0.616034	0.069374	Unclassified	0.616034	Admixed
PI561516	AR204	31.9071	23.1354	0.452823	0.455695	0.091482	Unclassified	0.455695	Admixed
PI561517	AR206	16.7928	23.0119	0.586202	0.278966	0.134831	Unclassified	0.586202	Admixed
PI561522	AR228	40.3701	22.6542	0.382691	0.546025	0.071284	Unclassified	0.546025	Admixed
PI561523	AR234	46.1527	29.4944	0.470081	0.485792	0.044127	Unclassified	0.485792	Admixed
PI561525	AR242	50.4019	28.7372	0.499999	0.466521	0.03348	Unclassified	0.499999	Admixed
PI561526	AR250	40.7859	33.4213	0.39927	0.550791	0.049939	Unclassified	0.550791	Admixed
PI561527	AR254	50.2707	14.8239	0.564722	0.391912	0.043367	Unclassified	0.564722	Admixed
PI561529	AR266	-56.8194	36.0588	0.264369	0.311008	0.424623	Unclassified	0.424623	Admixed
PI561531	AR270	24.6632	42.3055	0.370423	0.510247	0.11933	Unclassified	0.510247	Admixed
PI561532	AR272	45.8586	49.1648	0.280302	0.671823	0.047874	Unclassified	0.671823	Admixed
PI561533	AR276	37.1093	35.7969	0.407497	0.514791	0.077712	Unclassified	0.514791	Admixed
PI561537	AR400	27.584	29.933	0.405464	0.492534	0.102002	Unclassified	0.492534	Admixed
PI561565	B95	17.6197	2.31129	0.688087	0.17812	0.133793	Non-stiff stalk	0.688087	Admixed
PI561604	90176	50.0068	68.5523	0.04328	0.926095	0.030624	Tropical	0.926095	Subpopulation2
PI561613	90301	52.0007	56.0587	0.012388	0.954108	0.033504	Tropical	0.954108	Subpopulation2
PI561614	90313	59.1732	65.9022	1e-06	0.998875	0.001124	Tropical	0.998875	Subpopulation2
PI561694	NYRD4058	63.2986	-157.933	0.996889	1e-06	0.003111	Unclassified	0.996889	Subpopulation1
PI564682	B97	19.9383	8.74734	0.734759	0.140209	0.125031	Non-stiff stalk	0.734759	Subpopulation1
PI564716	AR200	41.4408	35.6984	0.322873	0.605898	0.071229	Unclassified	0.605898	Admixed
PI564852	B101	-57.9771	12.529	0.565491	0.018247	0.416262	Unclassified	0.565491	Admixed
PI568158	N199	26.0731	16.7323	0.700305	0.183481	0.116214	Unclassified	0.700305	Subpopulation1
PI568159	N200	15.2714	13.7403	0.61942	0.216213	0.164367	Unclassified	0.61942	Admixed
PI568160	N201	-287.323	-51.99	1e-06	0	0.999999	Stiff stalk	0.999999	Subpopulation3
PI572413	Oh599	25.6492	11.6531	0.606465	0.291224	0.102311	Unclassified	0.606465	Admixed
PI573098	Oh603	38.5243	14.8665	0.472644	0.461189	0.066167	Unclassified	0.472644	Admixed
PI583350	Mo45	32.2113	2.82282	0.412575	0.47747	0.109954	Unclassified	0.47747	Admixed
PI583352	Mo47	15.9896	20.3322	0.360824	0.465822	0.173354	Non-stiff stalk	0.465822	Admixed
PI583774	ML606	50.5887	-64.4484	0.999895	1e-06	0.000105	Unclassified	0.999895	Subpopulation1
PI583846	H126W	82.9193	-186.095	0.970103	0.029896	1e-06	Non-stiff stalk	0.970103	Subpopulation1
PI583847	H125	-183.044	-2.502	0.122794	1e-06	0.877206	Unclassified	0.877206	Subpopulation3
PI584528	B99	27.4484	3.81579	0.752047	0.14685	0.101102	Non-stiff stalk	0.752047	Subpopulation1
PI584529	B100	49.4762	-21.1988	0.853466	0.117528	0.029006	Non-stiff stalk	0.853466	Subpopulation1
PI587124	CM105	-115.995	36.7736	0.328124	1e-06	0.671876	Unclassified	0.671876	Admixed
PI587125	CO109	39.4875	21.843	0.547441	0.396948	0.055611	Unclassified	0.547441	Admixed
PI587127	H105W	-99.4762	40.3656	0.220457	0.133041	0.646501	Stiff stalk	0.646501	Admixed
PI587128	H84	-49.4537	0.249172	0.454988	0.125221	0.419791	Stiff stalk	0.454988	Admixed
PI587129	H99	51.6145	-22.8807	0.869481	0.107373	0.023147	Unclassified	0.869481	Subpopulation1
PI587136	KY228	32.3918	23.3862	0.467044	0.434756	0.0982	Unclassified	0.467044	Admixed
PI587137		31.0827	18.1125	0.804526	0.106915	0.088558	Unclassified	0.804526	Subpopulation1
PI587138	A554	40.6223	5.24158	0.743773	0.200053	0.056174	Unclassified	0.743773	Subpopulation1
PI587139	A619	59.2403	-78.4503	0.999999	1e-06	1e-06	Non-stiff stalk	0.999999	Subpopulation1
PI587140	A632	-162.389	45.6985	1e-06	1e-06	0.999999	Stiff stalk	0.999999	Subpopulation3
PI587141	A654	49.0288	16.0933	0.791656	0.17355	0.034794	Unclassified	0.791656	Subpopulation1
PI587142	A679	-246.932	-32.6482	0.037283	1e-06	0.962717	Unclassified	0.962717	Subpopulation3
PI587143	A682	65.2445	-193.5	0.96065	0	0.03935	Non-stiff stalk	0.96065	Subpopulation1
PI587144	Mo24W	42.8677	35.894	0.357453	0.578587	0.063961	Unclassified	0.578587	Admixed
PI587145	NC268	-172.001	-17.7163	0.044075	0.14964	0.806286	Unclassified	0.806286	Subpopulation3
PI587146	Oh7	4.53871	29.5654	0.682334	0.121485	0.19618	Unclassified	0.682334	Admixed
PI587147	Pa91	49.9032	-32.0389	0.987125	1e-06	0.012875	Unclassified	0.987125	Subpopulation1
PI587148	CI66	44.1793	18.0175	0.429441	0.522923	0.047636	Unclassified	0.522923	Admixed
PI587149	Va26	38.9615	-47.6361	0.944791	0.001908	0.053301	Non-stiff stalk	0.944791	Subpopulation1
PI587150	Va35	58.6949	-42.7525	0.674266	0.323491	0.002243	Non-stiff stalk	0.674266	Admixed
PI587151		48.9553	-36.5331	0.663643	0.303205	0.033152	Unclassified	0.663643	Admixed
PI587152	W64A	39.7065	-67.7241	0.954846	1e-06	0.045153	Stiff stalk	0.954846	Subpopulation1
PI587153	W117	43.7644	9.86044	0.555506	0.384328	0.060166	Non-stiff stalk	0.555506	Admixed
PI587154		47.7127	1.98373	0.813828	0.15327	0.032902	Non-stiff stalk	0.813828	Subpopulation1
PI587155	W182BN	10.7592	-4.71844	0.747444	0.102907	0.149649	Unclassified	0.747444	Subpopulation1
PI591014	BO385Y	44.9927	41.4777	0.241029	0.704848	0.054123	Unclassified	0.704848	Subpopulation2
PI591017	KO679Y	54.7719	26.1706	0.354707	0.627597	0.017696	Unclassified	0.627597	Admixed
PI592733	R228	54.922	-143.006	0.707342	0.243892	0.048766	Unclassified	0.707342	Subpopulation1
PI592734	R229	-277.524	-35.9614	1e-06	1e-06	0.999999	Unclassified	0.999999	Subpopulation3
PI592735	R230	-213.045	-16.7815	1e-06	0.173449	0.826551	Unclassified	0.826551	Subpopulation3
PI592741	N801w	-32.0257	11.1944	0.290786	0.406393	0.302821	Unclassified	0.406393	Admixed
PI593007	Hi25	-181.82	42.3214	0.064662	0.011741	0.923597	Unclassified	0.923597	Subpopulation3
PI593008	Hi26	1.66825	12.8268	0.469308	0.321684	0.209008	Unclassified	0.469308	Admixed
PI593009	Hi27	7.95368	64.2357	1e-06	0.80074	0.199259	Unclassified	0.80074	Subpopulation2
PI593010	Hi28	16.1722	62.5947	1e-06	0.85808	0.14192	Unclassified	0.85808	Subpopulation2
PI593013	Hi31	-157.608	52.576	0.001367	0.105345	0.893287	Unclassified	0.893287	Subpopulation3
PI593014	Hi33	28.3277	-49.9751	0.865024	0.026691	0.108284	Unclassified	0.865024	Subpopulation1
PI593015	Hi34	60.8756	66.6073	1e-06	0.986608	0.013391	Unclassified	0.986608	Subpopulation2
PI593017	Hi39	-95.346	55.1157	0.001442	0.388876	0.609682	Unclassified	0.609682	Admixed
PI593019	Hi41	-56.453	56.5121	1e-06	0.552101	0.447898	Unclassified	0.552101	Admixed
PI594045	B102	53.2532	-23.8258	0.867792	0.11076	0.021448	Non-stiff stalk	0.867792	Subpopulation1
PI594046	B103	22.3942	-41.4411	0.875133	1e-06	0.124866	Non-stiff stalk	0.875133	Subpopulation1
PI594047	B104	-134.049	-5.51375	0.344354	0	0.655646	Stiff stalk	0.655646	Admixed
PI594048	B105	-42.4325	6.33857	0.587403	0.049454	0.363143	Stiff stalk	0.587403	Admixed
PI594049	B106	50.5378	-47.2438	0.696552	0.280724	0.022724	Non-stiff stalk	0.696552	Admixed
PI594050	N501	-87.136	-4.18343	0.495196	1e-06	0.504804	Unclassified	0.504804	Admixed
PI594051	N502	-113.69	13.1474	0.394877	1e-06	0.605122	Unclassified	0.605122	Admixed
PI594052	N503	-66.5875	-2.05354	0.593034	1e-06	0.406966	Unclassified	0.593034	Admixed
PI594053	N504	-59.8633	-20.9302	0.593392	1e-06	0.406608	Unclassified	0.593392	Admixed
PI594054	N505	-51.9876	-20.6616	0.613511	1e-06	0.386488	Unclassified	0.613511	Admixed
PI594055	N506	-70.0485	4.12405	0.561248	0	0.438752	Unclassified	0.561248	Admixed
PI594056	N507	-42.5224	9.78292	0.586881	0.039964	0.373155	Unclassified	0.586881	Admixed
PI594057	N508	-62.7004	-18.4987	0.577818	1e-06	0.422182	Unclassified	0.577818	Admixed
PI594058	N509	-57.1796	-6.12702	0.603024	1e-06	0.396975	Unclassified	0.603024	Admixed
PI594059	N510	-122.243	0.604243	0.37492	1e-06	0.625079	Unclassified	0.625079	Admixed
PI594060	N511	-75.8082	-7.28657	0.546449	1e-06	0.45355	Unclassified	0.546449	Admixed
PI594061	N512	-66.846	-15.5387	0.56153	1e-06	0.438469	Unclassified	0.56153	Admixed
PI594062	N513	-57.6068	-15.4139	0.608156	1e-06	0.391844	Unclassified	0.608156	Admixed
PI594063	N514	-56.6378	-15.9861	0.611915	1e-06	0.388084	Unclassified	0.611915	Admixed
PI594064	N515	-73.1307	-7.05204	0.554711	1e-06	0.445288	Unclassified	0.554711	Admixed
PI594065	N516	-55.9053	-5.44411	0.540554	0.065271	0.394175	Unclassified	0.540554	Admixed
PI594066	N517	-17.7763	-25.2347	0.733235	1e-06	0.266765	Unclassified	0.733235	Subpopulation1
PI594067	N518	-55.4893	-1.80033	0.566743	0.021845	0.411412	Unclassified	0.566743	Admixed
PI594068	N519	-55.3798	-5.67973	0.614668	1e-06	0.385331	Unclassified	0.614668	Admixed
PI594069	N520	-73.162	-12.791	0.533202	1e-06	0.466797	Unclassified	0.533202	Admixed
PI594070	N521	-75.2519	-14.5134	0.527533	1e-06	0.472467	Unclassified	0.527533	Admixed
PI594071	N523	-38.2218	1.26343	0.644434	0.017334	0.338233	Unclassified	0.644434	Admixed
PI594072	N524	-66.8744	-8.043	0.548354	0.000166	0.45148	Unclassified	0.548354	Admixed
PI594073	N525	-77.0159	-16.0291	0.524194	1e-06	0.475805	Unclassified	0.524194	Admixed
PI594074	N526	-48.7513	5.19422	0.630501	0.000241	0.369258	Unclassified	0.630501	Admixed
PI594075	N528	-33.4106	7.02508	0.595332	0.061898	0.342769	Unclassified	0.595332	Admixed
PI594076	N529	-8.43789	5.97087	0.794967	0	0.205032	Unclassified	0.794967	Subpopulation1
PI594077	N530	-1.05536	-0.095291	0.818655	1e-06	0.181344	Unclassified	0.818655	Subpopulation1
PI594078	N532	3.78565	2.11431	0.838683	1e-06	0.161316	Unclassified	0.838683	Subpopulation1
PI594079	N533	-0.24421	1.95868	0.824459	1e-06	0.175541	Unclassified	0.824459	Subpopulation1
PI594080	N534	7.71091	-8.56199	0.848754	1e-06	0.151246	Unclassified	0.848754	Subpopulation1
PI594081	N535	1.49435	3.04797	0.829007	1e-06	0.170992	Unclassified	0.829007	Subpopulation1
PI594082	N536	-71.3398	-16.7601	0.56201	1e-06	0.437989	Unclassified	0.56201	Admixed
PI594083	N537	-67.5828	-10.6309	0.5755	1e-06	0.424499	Unclassified	0.5755	Admixed
PI594084	N538	-61.7017	-15.8259	0.585642	1e-06	0.414358	Unclassified	0.585642	Admixed
PI594085	N539	-70.3897	-16.585	0.564404	1e-06	0.435595	Unclassified	0.564404	Admixed
PI594086	N540	-71.0755	-17.0515	0.562711	1e-06	0.437289	Unclassified	0.562711	Admixed
PI594088	N542	-57.4446	-2.12415	0.61139	0	0.388609	Unclassified	0.61139	Admixed
PI594090	N544	-51.4145	-13.7199	0.634379	1e-06	0.365621	Unclassified	0.634379	Admixed
PI594091	N545	-56.4469	-16.1339	0.613013	1e-06	0.386986	Unclassified	0.613013	Admixed
PI595366	N209	-59.8122	-26.0256	0.587975	1e-06	0.412025	Unclassified	0.587975	Admixed
PI595367	N215	7.70994	8.72819	0.85588	1e-06	0.14412	Unclassified	0.85588	Subpopulation1
PI595541	CML247	68.1992	81.8032	1e-06	0.999999	1e-06	Tropical	0.999999	Subpopulation2
PI595544	CML264	60.2043	68.6997	1e-06	0.982215	0.017784	Tropical	0.982215	Subpopulation2
PI595549	CML274	63.0667	65.4647	1e-06	0.998093	0.001906	Tropical	0.998093	Subpopulation2
PI595553	CML25	57.0661	74.5962	1e-06	0.992397	0.007602	Tropical	0.992397	Subpopulation2
PI595554	CML27	55.1917	73.1213	1e-06	0.997392	0.002607	Tropical	0.997392	Subpopulation2
PI595556	CML29	60.0465	71.0329	0	0.999999	1e-06	Tropical	0.999999	Subpopulation2
PI595558	CML32	60.6063	73.6047	6e-06	0.998702	0.001292	Tropical	0.998702	Subpopulation2
PI595559	CML33	62.8296	70.7727	1e-06	0.999469	0.00053	Tropical	0.999469	Subpopulation2
PI595568	CML299	63.5256	68.625	1e-06	0.999999	1e-06	Tropical	0.999999	Subpopulation2
PI595569	CML300	63.4031	69.1994	1e-06	0.999999	1e-06	Tropical	0.999999	Subpopulation2
PI595616	ZS01250	44.5971	-69.9547	0.805092	0.141654	0.053255	Unclassified	0.805092	Subpopulation1
PI596355	N216	-5.77834	-10.1509	0.817153	1e-06	0.182847	Unclassified	0.817153	Subpopulation1
PI596356	N217	-166.259	35.8886	0.147184	1e-06	0.852815	Unclassified	0.852815	Subpopulation3
PI596357	N218	-186.545	14.3303	0.04123	0.058608	0.900162	Unclassified	0.900162	Subpopulation3
PI596499	OC12	38.7408	42.4322	0.379137	0.554718	0.066145	Unclassified	0.554718	Admixed
PI596500	OC13	56.9892	20.4533	0.4915	0.484659	0.023841	Unclassified	0.4915	Admixed
PI596501	OC14	34.8022	37.0344	0.424832	0.489009	0.086159	Unclassified	0.489009	Admixed
PI596502	OC15	44.2953	34.1446	0.322364	0.609624	0.068012	Unclassified	0.609624	Admixed
PI596505	OC18	42.1625	28.0173	0.445492	0.494332	0.060176	Unclassified	0.494332	Admixed
PI596627	Mp710	42.2571	35.1327	0.421509	0.510177	0.068314	Unclassified	0.510177	Admixed
PI596628	Mp711	36.4382	24.8583	0.390291	0.525396	0.084314	Unclassified	0.525396	Admixed
PI596629	Mp712	28.4642	29.6722	0.370482	0.517831	0.111687	Unclassified	0.517831	Admixed
PI597578	N546	36.0988	26.5675	0.437642	0.48183	0.080528	Unclassified	0.48183	Admixed
PI597925	B107	11.879	-27.2356	0.867367	1e-06	0.132632	Non-stiff stalk	0.867367	Subpopulation1
PI597926	B108	44.049	9.26364	0.397742	0.526232	0.076026	Non-stiff stalk	0.526232	Admixed
PI597927	B109	-239.75	-42.2537	0.069204	1e-06	0.930796	Stiff stalk	0.930796	Subpopulation3
PI600729	LP1NRHT	-187.398	45.5301	1e-06	1e-06	0.999999	Stiff stalk	0.999999	Subpopulation3
PI600751	SeagullSeventeen	94.7047	-296.991	0.999999	0	1e-06	Non-stiff stalk	0.999999	Subpopulation1
PI600772	FR19	-53.7211	20.6425	0.514451	0.090577	0.394972	Stiff stalk	0.514451	Admixed
PI600791	LH38	60.0495	-80.9518	0.999999	0	1e-06	Non-stiff stalk	0.999999	Subpopulation1
PI600944	LH39	55.329	-84.7939	0.999999	0	0	Non-stiff stalk	0.999999	Subpopulation1
PI600954	LH119	-272.169	-45.3497	0	0	0.999999	Stiff stalk	0.999999	Subpopulation3
PI600955	LH51	92.4736	-281.873	0.999999	1e-06	0	Non-stiff stalk	0.999999	Subpopulation1
PI600956	MDF-13D	66.9776	-150.727	0.999999	1e-06	1e-06	Non-stiff stalk	0.999999	Subpopulation1
PI600957	LH74	-254.903	-4.43485	0	0	0.999999	Stiff stalk	0.999999	Subpopulation3
PI600958	FAPW	-139.348	13.9377	0.242476	1e-06	0.757523	Stiff stalk	0.757523	Subpopulation3
PI600959	LH145	-118.413	39.5043	0.284803	1e-06	0.715197	Stiff stalk	0.715197	Subpopulation3
PI600981	PHG39	-87.0874	10.9227	0.339877	0.021642	0.638481	Unclassified	0.638481	Admixed
PI601004	LH132	-266.923	-43.281	1e-06	0	0.999999	Stiff stalk	0.999999	Subpopulation3
PI601005	207	23.8109	-15.9168	0.964453	0	0.035547	Non-stiff stalk	0.964453	Subpopulation1
PI601007	BO9	-83.3981	-10.8857	0.518941	0	0.481058	Unclassified	0.518941	Admixed
PI601008	PHG35	31.6438	-5.07887	0.93757	1e-06	0.062429	Non-stiff stalk	0.93757	Subpopulation1
PI601009	B47	-23.4002	-0.224249	0.572761	0.123737	0.303503	Stiff stalk	0.572761	Admixed
PI601026	F42	-305.51	-43.7642	0	0	0.999999	Stiff stalk	0.999999	Subpopulation3
PI601037	G80	-53.2959	-38.3027	0.570335	0.00842	0.421245	Stiff stalk	0.570335	Admixed
PI601079	LH123HT	47.5567	-136.652	0.975211	1e-06	0.024789	Non-stiff stalk	0.975211	Subpopulation1
PI601080	CR1HT	67.7122	-158.663	0.97897	0.018494	0.002537	Unclassified	0.97897	Subpopulation1
PI601150	PHG71	-95.4022	19.7124	0.467545	1e-06	0.532454	Stiff stalk	0.532454	Admixed
PI601159	6103	-168.907	39.1025	0.158807	1e-06	0.841192	Unclassified	0.841192	Subpopulation3
PI601170	LH82	26.0079	-10.2885	0.895245	0.001606	0.10315	Non-stiff stalk	0.895245	Subpopulation1
PI601171	LH93	50.0158	-6.54511	0.717968	0.246538	0.035494	Unclassified	0.717968	Subpopulation1
PI601172	HBA1	3.75586	-6.47442	0.538793	0.242464	0.218743	Unclassified	0.538793	Admixed
PI601190	Q381	25.939	-15.6286	0.971525	0	0.028475	Stiff stalk	0.971525	Subpopulation1
PI601191	DJ7	-301.387	-43.328	1e-06	0	0.999999	Stiff stalk	0.999999	Subpopulation3
PI601208	IB014	41.9059	-25.8367	0.990491	1e-06	0.009508	Non-stiff stalk	0.990491	Subpopulation1
PI601209	MB	83.1209	-229.869	0.999999	1e-06	1e-06	Non-stiff stalk	0.999999	Subpopulation1
PI601210	78004	-232.537	3.64647	1e-06	0	0.999999	Stiff stalk	0.999999	Subpopulation3
PI601211	78010	-234.52	1.82532	1e-06	1e-06	0.999999	Unclassified	0.999999	Subpopulation3
PI601229	PHG83	21.3268	-25.6079	0.906186	1e-06	0.093813	Non-stiff stalk	0.906186	Subpopulation1
PI601230	LH150	56.519	-20.3374	0.472886	0.509064	0.01805	Unclassified	0.509064	Admixed
PI601269	5707	61.2385	-88.9948	0.756881	0.228533	0.014586	Non-stiff stalk	0.756881	Subpopulation1
PI601270	PHG29	29.89	-20.1641	0.965624	1e-06	0.034375	Non-stiff stalk	0.965624	Subpopulation1
PI601300	4676A	-54.889	21.6312	0.46575	0.097779	0.436471	Stiff stalk	0.46575	Admixed
PI601301	78002A	-250.671	-11.3971	0	0	0.999999	Stiff stalk	0.999999	Subpopulation3
PI601316	LH54	85.0868	-238.041	0.999999	0	1e-06	Non-stiff stalk	0.999999	Subpopulation1
PI601317	LH57	82.1175	-203.044	0.999999	1e-06	0	Non-stiff stalk	0.999999	Subpopulation1
PI601318	PHG47	42.8514	-56.1113	0.961798	0.009409	0.028794	Non-stiff stalk	0.961798	Subpopulation1
PI601319	PHG72	-14.3093	-6.97652	0.793684	1e-06	0.206316	Non-stiff stalk	0.793684	Subpopulation1
PI601320	PHG84	38.5436	-25.3	0.934386	0.008376	0.057238	Non-stiff stalk	0.934386	Subpopulation1
PI601321	PHJ40	16.2453	-76.1963	0.797695	0.048233	0.154072	Unclassified	0.797695	Subpopulation1
PI601322	PHZ51	34.7567	-53.4244	0.889389	0.012675	0.097935	Non-stiff stalk	0.889389	Subpopulation1
PI601323	SX-4-21Tetraploid	39.8143	17.8108	0.529897	0.403935	0.066169	Unclassified	0.529897	Admixed
PI601331	SX-6-3Tetraploid	28.4921	16.1293	0.564641	0.318568	0.116791	Unclassified	0.564641	Admixed
PI601332	SX-6-7Tetraploid	28.7315	18.5052	0.625684	0.266073	0.108243	Unclassified	0.625684	Admixed
PI601360	LH52	78.3734	-221.703	0.999999	1e-06	1e-06	Non-stiff stalk	0.999999	Subpopulation1
PI601361	PHR36	29.1364	-8.9105	0.809683	0.100594	0.089723	Non-stiff stalk	0.809683	Subpopulation1
PI601362	PHW17	-174.134	7.89852	1e-06	0.251098	0.748901	Stiff stalk	0.748901	Subpopulation3
PI601374	764	-222.785	-8.1995	0.045199	1e-06	0.954801	Unclassified	0.954801	Subpopulation3
PI601375	778	-11.926	12.364	0.478786	0.252174	0.26904	Unclassified	0.478786	Admixed
PI601377	794	-268.299	-24.8628	0	0	0.999999	Unclassified	0.999999	Subpopulation3
PI601378	LP5	-224.854	-31.1652	0.054561	0.067975	0.877464	Stiff stalk	0.877464	Subpopulation3
PI601402	LH146Ht	-188.454	16.1332	0.123309	1e-06	0.876691	Stiff stalk	0.876691	Subpopulation3
PI601403	LH156	33.0348	-21.4732	0.761905	0.174749	0.063346	Non-stiff stalk	0.761905	Subpopulation1
PI601404	LH60	76.1075	-126.72	0.935889	0.064111	1e-06	Unclassified	0.935889	Subpopulation1
PI601405	LH85	48.0726	18.4609	0.749158	0.217745	0.033097	Non-stiff stalk	0.749158	Subpopulation1
PI601416	LH61	80.0081	-230.486	0.999999	1e-06	0	Unclassified	0.999999	Subpopulation1
PI601417	NS701	-265.902	-21.1575	0	0	0.999999	Stiff stalk	0.999999	Subpopulation3
PI601430	807	-7.65757	-0.449167	0.568923	0.173244	0.257834	Unclassified	0.568923	Admixed
PI601438	78371A	66.5149	-132.247	0.999999	1e-06	0	Non-stiff stalk	0.999999	Subpopulation1
PI601439	FBHJ	-93.4991	35.2731	0.379181	0.067957	0.552862	Stiff stalk	0.552862	Admixed
PI601440	MBPM	41.7542	-24.7648	0.804308	0.149073	0.046618	Non-stiff stalk	0.804308	Subpopulation1
PI601441	PB80	-261.551	-27.2727	0	0	0.999999	Stiff stalk	0.999999	Subpopulation3
PI601442	PHG86	-216.158	-11.7015	1e-06	0.083021	0.916978	Stiff stalk	0.916978	Subpopulation3
PI601458	IBB15	16.5626	-9.43263	0.933693	1e-06	0.066307	Unclassified	0.933693	Subpopulation1
PI601459	IBC2	30.7089	-50.6974	0.972818	1e-06	0.027181	Non-stiff stalk	0.972818	Subpopulation1
PI601466	LH59	83.0425	-213.58	0.999999	1e-06	1e-06	Non-stiff stalk	0.999999	Subpopulation1
PI601467	PHK05	44.9186	24.0639	0.578196	0.366004	0.055801	Unclassified	0.578196	Admixed
PI601468	PHK29	-128.14	-15.1383	0.3329	0.040093	0.627007	Stiff stalk	0.627007	Admixed
PI601469	PHR25	30.0045	-0.582259	0.941355	0	0.058645	Unclassified	0.941355	Subpopulation1
PI601470	PHV78	40.4763	-33.1836	0.960709	1e-06	0.03929	Non-stiff stalk	0.960709	Subpopulation1
PI601489	740	89.6017	-243.127	0.962349	0.037651	1e-06	Unclassified	0.962349	Subpopulation1
PI601490	787	46.4401	-47.8957	0.783915	0.185133	0.030952	Unclassified	0.783915	Subpopulation1
PI601491	790	-233.548	-10.2385	0.008835	0.031226	0.959939	Unclassified	0.959939	Subpopulation3
PI601492	793	-258.046	-22.8268	0	0	0.999999	Unclassified	0.999999	Subpopulation3
PI601493	LH149	-242.779	-32.0616	0.048954	0.004388	0.946659	Stiff stalk	0.946659	Subpopulation3
PI601494	LH65	81.1529	-219.836	0.999999	0	0	Non-stiff stalk	0.999999	Subpopulation1
PI601495	PHK42	33.5296	-18.2549	0.974904	1e-06	0.025095	Non-stiff stalk	0.974904	Subpopulation1
PI601496	PHK76	64.761	-107.834	0.976655	0.001766	0.021578	Non-stiff stalk	0.976655	Subpopulation1
PI601497	PHN11	32.309	-24.8608	0.98497	1e-06	0.01503	Non-stiff stalk	0.98497	Subpopulation1
PI601498	PHT55	-77.1798	13.9065	0.322082	0.099327	0.578591	Stiff stalk	0.578591	Admixed
PI601499	PHT77	55.1946	-68.3841	0.981604	1e-06	0.018395	Non-stiff stalk	0.981604	Subpopulation1
PI601500	PHV63	-49.4522	-35.906	0.506397	0.110201	0.383402	Non-stiff stalk	0.506397	Admixed
PI601501	PHW65	57.8037	-51.7997	0.995061	1e-06	0.004938	Non-stiff stalk	0.995061	Subpopulation1
PI601502	W8304	-284.425	-24.6418	0	0	0.999999	Unclassified	0.999999	Subpopulation3
PI601558	11430	45.075	-54.4601	0.999999	0	1e-06	Unclassified	0.999999	Subpopulation1
PI601559	2369	-220.802	-49.7466	0.126164	1e-06	0.873836	Unclassified	0.873836	Subpopulation3
PI601560	2MA22	16.4896	3.12348	0.850743	1e-06	0.149257	Non-stiff stalk	0.850743	Subpopulation1
PI601561	6M502	62.4098	-67.9868	0.88	0.092681	0.027319	Non-stiff stalk	0.88	Subpopulation1
PI601562	78551S	65.4234	-136.855	0.999612	1e-06	0.000388	Non-stiff stalk	0.999612	Subpopulation1
PI601563	87916W	-159.012	-19.1888	0.195988	0.101228	0.702784	Stiff stalk	0.702784	Subpopulation3
PI601564	HB8229	-55.7946	43.5642	0.205853	0.351022	0.443125	Stiff stalk	0.443125	Admixed
PI601565	IBB14	-39.3986	-10.6446	0.696956	1e-06	0.303044	Stiff stalk	0.696956	Admixed
PI601566	MBST	63.3876	-99.7715	0.999999	0	1e-06	Non-stiff stalk	0.999999	Subpopulation1
PI601567	PHH93	32.0616	-20.6326	0.981493	1e-06	0.018507	Non-stiff stalk	0.981493	Subpopulation1
PI601568	PHM49	44.5896	-57.2547	0.992157	1e-06	0.007842	Non-stiff stalk	0.992157	Subpopulation1
PI601569	PHN47	40.1474	1.73122	0.613435	0.350191	0.036374	Unclassified	0.613435	Admixed
PI601570	PHP02	19.5164	-18.7897	0.940504	1e-06	0.059495	Non-stiff stalk	0.940504	Subpopulation1
PI601571	PHR32	41.5086	-20.2093	0.772986	0.169412	0.057603	Unclassified	0.772986	Subpopulation1
PI601572	PHR47	-17.0895	-38.2231	0.693499	1e-06	0.3065	Stiff stalk	0.693499	Admixed
PI601573	PHT10	-208.56	-14.2738	0.054268	1e-06	0.945731	Stiff stalk	0.945731	Subpopulation3
PI601574	PHT60	61.4681	-47.1955	0.868567	0.131306	0.000128	Non-stiff stalk	0.868567	Subpopulation1
PI601575	PHW52	-161.291	-7.72345	0.162396	1e-06	0.837603	Stiff stalk	0.837603	Subpopulation3
PI601576	PHW79	19.699	-42.5658	0.767829	0.065207	0.166965	Non-stiff stalk	0.767829	Subpopulation1
PI601583	NS501	-76.8175	12.0023	0.52355	1e-06	0.47645	Stiff stalk	0.52355	Admixed
PI601610	H8431	-121.95	20.0962	0.374116	0.014179	0.611706	Stiff stalk	0.611706	Admixed
PI601611	S8324	-207.98	-42.5442	0.143178	1e-06	0.856822	Unclassified	0.856822	Subpopulation3
PI601612	S8326	86.2617	-238.406	0.999999	1e-06	1e-06	Unclassified	0.999999	Subpopulation1
PI601658	1538	-35.9531	19.2406	0.677473	1e-06	0.322526	Unclassified	0.677473	Admixed
PI601683	CR14	-204.457	-3.99676	0.126017	1e-06	0.873983	Unclassified	0.873983	Subpopulation3
PI601684	WIL900	91.9295	-234.977	0.917641	0.082358	0	Unclassified	0.917641	Subpopulation1
PI601685	WIL901	85.7027	-209.221	0.866262	0.133738	0	Non-stiff stalk	0.866262	Subpopulation1
PI601686	WIL903	93.2558	-219.627	0.894719	0.10528	0	Non-stiff stalk	0.894719	Subpopulation1
PI601689	WIL500	1.91493	59.6786	0.199772	0.605754	0.194474	Non-stiff stalk	0.605754	Admixed
PI601724	E8501	67.5158	-113.775	0.888705	0.103409	0.007887	Unclassified	0.888705	Subpopulation1
PI601725	J8606	49.2303	-78.1445	0.935856	0.041558	0.022586	Unclassified	0.935856	Subpopulation1
PI601726	L127	21.3096	-3.55014	0.912929	1.4e-05	0.087057	Non-stiff stalk	0.912929	Subpopulation1
PI601727	L135	32.299	-15.764	0.971254	1e-06	0.028745	Non-stiff stalk	0.971254	Subpopulation1
PI601728	L139	55.4246	-57.5963	0.999999	0	0	Non-stiff stalk	0.999999	Subpopulation1
PI601729	W8555	-238.683	-25.8564	0.057742	1e-06	0.942257	Unclassified	0.942257	Subpopulation3
PI601745	4N506	-184.505	-30.8097	0.188476	1e-06	0.811523	Stiff stalk	0.811523	Subpopulation3
PI601773	PHJ31	52.305	27.8059	0.498245	0.466591	0.035164	Unclassified	0.498245	Admixed
PI601774	PHJ33	28.9094	-48.0577	0.907723	1e-06	0.092276	Non-stiff stalk	0.907723	Subpopulation1
PI601775	PHJ70	-156.272	-21.3083	0.290732	1e-06	0.709267	Stiff stalk	0.709267	Subpopulation3
PI601776	PHJ75	33.1407	6.06094	0.804737	0.145449	0.049813	Unclassified	0.804737	Subpopulation1
PI601777	PHK35	-170.879	-17.9605	0.158231	1e-06	0.841768	Unclassified	0.841768	Subpopulation3
PI601778	PHM10	-17.2509	-2.30188	0.750943	1e-06	0.249057	Stiff stalk	0.750943	Subpopulation1
PI601779	PHM57	41.0712	22.8191	0.459971	0.456962	0.083067	Unclassified	0.459971	Admixed
PI601780	PHN29	-86.0843	-15.8235	0.534292	1e-06	0.465707	Stiff stalk	0.534292	Admixed
PI601781	PHN37	69.3941	-104.646	0.999999	1e-06	1e-06	Unclassified	0.999999	Subpopulation1
PI601782	PHN73	44.3185	-60.7477	0.947747	1e-06	0.052252	Non-stiff stalk	0.947747	Subpopulation1
PI601783	PHN82	23.4963	-42.4596	0.90917	1e-06	0.090829	Non-stiff stalk	0.90917	Subpopulation1
PI601784	PHP55	11.1036	-17.229	0.897355	1e-06	0.102644	Stiff stalk	0.897355	Subpopulation1
PI601786	PHR62	44.3597	-13.3997	0.992016	0	0.007984	Non-stiff stalk	0.992016	Subpopulation1
PI601788	PHT22	37.8172	-51.3872	0.975438	1e-06	0.024562	Non-stiff stalk	0.975438	Subpopulation1
PI601789	PHV37	-65.9616	5.85354	0.39138	0.125658	0.482962	Stiff stalk	0.482962	Admixed
PI601790	PHW03	22.5888	6.66928	0.677554	0.199382	0.123064	Stiff stalk	0.677554	Admixed
PI601791	PHW20	11.9797	17.3535	0.516172	0.322652	0.161176	Non-stiff stalk	0.516172	Admixed
PI601792	PHW43	33.2308	-30.1146	0.927427	1e-06	0.072573	Non-stiff stalk	0.927427	Subpopulation1
PI601808	2FACC	-160.856	-14.0201	0.260075	1e-06	0.739924	Stiff stalk	0.739924	Subpopulation3
PI603939	B42	33.3317	4.63666	0.823506	0.084755	0.091739	Non-stiff stalk	0.823506	Subpopulation1
PI604605	N522	-48.2808	-4.38479	0.634027	1e-06	0.365973	Unclassified	0.634027	Admixed
PI604606	N527	-71.0625	6.38738	0.55522	1e-06	0.44478	Unclassified	0.55522	Admixed
PI606329	DE1	52.2065	-25.9725	0.857576	0.141709	0.000715	Unclassified	0.857576	Subpopulation1
PI606330	DE2	44.0395	-21.2781	0.835352	0.153283	0.011365	Non-stiff stalk	0.835352	Subpopulation1
PI606768	SD40	-17.5035	-16.6004	0.757198	1e-06	0.242801	Unclassified	0.757198	Subpopulation1
PI606769	SD41	54.0131	-33.0806	0.924975	0.06483	0.010195	Unclassified	0.924975	Subpopulation1
PI607512	N7A	-43.2013	14.8546	0.584654	0.064661	0.350685	Stiff stalk	0.584654	Admixed
PI607519	ND240	7.5928	26.4931	0.594882	0.237728	0.16739	Unclassified	0.594882	Admixed
PI607521	A661	19.5683	16.38	0.65579	0.215593	0.128616	Unclassified	0.65579	Admixed
PI607522	A662	51.0636	10.2172	0.64524	0.308236	0.046524	Unclassified	0.64524	Admixed
PI607523	A663	26.0124	0.766968	0.632202	0.254158	0.11364	Unclassified	0.632202	Admixed
PI607524	A664	-133.252	38.4247	0.256578	1e-06	0.743421	Unclassified	0.743421	Subpopulation3
PI607525	A665	-151.648	35.5938	0.187338	1e-06	0.812661	Stiff stalk	0.812661	Subpopulation3
PI607527	ND300	17.9	16.6081	0.689038	0.185682	0.125281	Unclassified	0.689038	Admixed
PI608764	B55	8.75597	-48.1797	0.837693	1e-06	0.162306	Unclassified	0.837693	Subpopulation1
PI608765	B77	49.1171	-4.9803	0.52463	0.428136	0.047234	Unclassified	0.52463	Admixed
PI608766	B79	-2.38514	-14.6841	0.743006	0.046403	0.210592	Unclassified	0.743006	Subpopulation1
PI608767	B84	-145.894	0.610187	0.284956	1e-06	0.715043	Unclassified	0.715043	Subpopulation3
PI608768	B87	37.5477	-17.3555	0.782973	0.132935	0.084092	Unclassified	0.782973	Subpopulation1
PI608774	B75	2.86653	-20.9576	0.649926	0.146561	0.203513	Non-stiff stalk	0.649926	Admixed
PI608777	B85	24.7108	-16.9335	0.735794	0.149768	0.114438	Unclassified	0.735794	Subpopulation1
PI608778	B86	52.6669	-69.9718	0.989163	1e-06	0.010836	Unclassified	0.989163	Subpopulation1
PI608806	Mp714	66.2109	59.0214	0.035214	0.964786	1e-06	Unclassified	0.964786	Subpopulation2
PI610493	NY5526	45.062	47.4841	0.131918	0.79727	0.070812	Unclassified	0.79727	Subpopulation2
PI610494	NY6371	43.3851	35.5256	0.294635	0.631315	0.07405	Unclassified	0.631315	Admixed
PI613179	T173	64.6486	-144.062	0.771153	0.199089	0.029758	Unclassified	0.771153	Subpopulation1
PI614142	GEMS-0001	-30.5499	3.98098	0.595642	0.089912	0.314446	Stiff stalk	0.595642	Admixed
PI614820	Mp716	60.8179	75.3602	1e-06	0.999999	1e-06	Unclassified	0.999999	Subpopulation2
PI631444	T270	24.9456	34.9936	0.311272	0.576866	0.111863	Unclassified	0.576866	Admixed
PI632413	GEMS-0002	-65.0956	11.9979	0.156686	0.400548	0.442766	Non-stiff stalk	0.442766	Admixed
PI633840	Tx714	-279.383	-47.1539	1e-06	0	0.999999	Unclassified	0.999999	Subpopulation3
PI633924	T272	23.4491	26.2446	0.518489	0.350675	0.130836	Unclassified	0.518489	Admixed
PI634206	Mo48	37.0186	4.52267	0.363645	0.557496	0.078859	Unclassified	0.557496	Admixed
PI634207	Mo49	10.4385	6.12139	0.478912	0.347161	0.173926	Unclassified	0.478912	Admixed
PI635122	TZMI711	61.1136	66.3906	1e-06	0.999999	1e-06	Tropical	0.999999	Subpopulation2
PI635126	TZMI715	54.0775	70.5163	1e-06	0.993802	0.006198	Tropical	0.993802	Subpopulation2
PI635128	TZMI717	54.785	59.6951	0.056549	0.915118	0.028333	Tropical	0.915118	Subpopulation2
PI635129	TZMI718	57.8669	61.9035	1e-06	0.996059	0.00394	Tropical	0.996059	Subpopulation2
PI635131	TZMI720	54.5478	70.2728	1e-06	0.976345	0.023654	Tropical	0.976345	Subpopulation2
PI635140	TZMI729	55.8361	69.5084	0.010912	0.974662	0.014427	Tropical	0.974662	Subpopulation2
PI635141	TZMI730	68.235	62.5343	1e-06	0.999999	1e-06	Tropical	0.999999	Subpopulation2
PI638550	N552	-51.4776	-12.2788	0.578216	0.021529	0.400255	Unclassified	0.578216	Admixed
PI639037	GEMS-0004	-95.6171	21.2582	1e-06	0.491602	0.508397	Unclassified	0.508397	Admixed
PI639038	GEMS-0005	-118.291	21.0839	1e-06	0.447453	0.552547	Unclassified	0.552547	Admixed
PI639039	GEMS-0006	-142.81	1.20123	1e-06	0.333472	0.666527	Unclassified	0.666527	Admixed
PI639040	GEMS-0009	-97.0671	11.4967	1e-06	0.481007	0.518992	Unclassified	0.518992	Admixed
PI639041	GEMS-0010	-130.583	11.0208	1e-06	0.37642	0.623579	Unclassified	0.623579	Admixed
PI639042	GEMS-0011	-133.733	2.00462	1e-06	0.378423	0.621576	Unclassified	0.621576	Admixed
PI639044	GEMS-0013	-104.426	13.1755	1e-06	0.464673	0.535326	Unclassified	0.535326	Admixed
PI639046	GEMS-0017	-90.3051	5.96102	0.000577	0.485154	0.514269	Unclassified	0.514269	Admixed
PI639048	GEMS-0019	-63.2666	16.2489	1e-06	0.594424	0.405576	Unclassified	0.594424	Admixed
PI639049	GEMS-0020	-110.935	0.813894	1e-06	0.43308	0.56692	Unclassified	0.56692	Admixed
PI639050	GEMS-0021	-159.636	-18.8033	0.000789	0.251587	0.747624	Unclassified	0.747624	Subpopulation3
PI639052	GEMS-0024	-9.12312	33.2215	0.231854	0.52601	0.242136	Unclassified	0.52601	Admixed
PI639053	GEMS-0028	-16.3136	48.1316	0.131972	0.613129	0.254899	Unclassified	0.613129	Admixed
PI639055	GEMS-0030	-32.4066	41.0495	0.078944	0.611381	0.309675	Unclassified	0.611381	Admixed
PI639056	GEMS-0031	-26.8624	41.9703	1e-06	0.705144	0.294855	Unclassified	0.705144	Subpopulation2
PI639111	Oh605	46.6842	-22.2557	0.854975	0.099185	0.04584	Unclassified	0.854975	Subpopulation1
PI639500	GEMN-0037	56.4524	-31.0507	0.626156	0.361438	0.012407	Unclassified	0.626156	Admixed
PI639501	GEMN-0039	49.2657	-58.0626	0.671549	0.279733	0.048718	Unclassified	0.671549	Admixed
PI639502	GEMN-0040	50.9876	-38.6794	0.646524	0.323776	0.029699	Unclassified	0.646524	Admixed
PI639503	GEMN-0041	-116.218	7.22578	1e-06	0.430425	0.569575	Unclassified	0.569575	Admixed
PI639504	GEMN-0042	54.5657	-21.7798	0.581024	0.400728	0.018249	Unclassified	0.581024	Admixed
PI639928	TZSTRI104	40.8785	65.2127	1e-06	0.941941	0.058059	Tropical	0.941941	Subpopulation2
PI639931	TZSTRI107	46.1284	77.1321	1e-06	0.970722	0.029277	Tropical	0.970722	Subpopulation2
PI639932	TZSTRI108	46.0355	71.6972	1e-06	0.965378	0.034622	Tropical	0.965378	Subpopulation2
PI639935	TZSTRI111	52.6588	75.7024	0.000104	0.97333	0.026565	Tropical	0.97333	Subpopulation2
PI639936	TZSTRI112	35.5918	58.5256	0.014463	0.881584	0.103953	Tropical	0.881584	Subpopulation2
PI639937	TZSTRI113	46.5461	55.8266	1e-06	0.923635	0.076364	Tropical	0.923635	Subpopulation2
PI639938	TZSTRI114	38.1087	47.3067	0.033207	0.866426	0.100366	Tropical	0.866426	Subpopulation2
PI639940	TZSTRI116	43.2974	61.5393	1e-06	0.921752	0.078247	Tropical	0.921752	Subpopulation2
PI639941	TZSTRI117	46.943	39.3171	0.169251	0.783144	0.047605	Tropical	0.783144	Subpopulation2
PI639945	TZSTRI121	63.5186	66.7271	1e-06	0.999999	1e-06	Tropical	0.999999	Subpopulation2
PI639946	TZSTRI122	58.1826	64.8653	0.074938	0.923894	0.001168	Tropical	0.923894	Subpopulation2
PI639949	TZSTRI125	53.4291	61.0721	0.002767	0.976308	0.020924	Tropical	0.976308	Subpopulation2
PI641061	TZEI1	63.3612	61.1173	0.011271	0.988729	1e-06	Tropical	0.988729	Subpopulation2
PI641063	TZEI3	59.923	70.9384	1e-06	0.99806	0.001939	Tropical	0.99806	Subpopulation2
PI641065	TZEI5	60.7909	66.6253	9.9e-05	0.994863	0.005038	Tropical	0.994863	Subpopulation2
PI641067	TZEI7	58.2331	64.529	1e-06	0.991147	0.008852	Tropical	0.991147	Subpopulation2
PI641070	TZEI10	45.1543	54.0293	0.05223	0.888526	0.059244	Tropical	0.888526	Subpopulation2
PI641071	TZEI11	60.5813	54.4822	1e-06	0.975943	0.024056	Tropical	0.975943	Subpopulation2
PI641072	TZEI12	44.7112	46.4215	0.038995	0.87595	0.085055	Tropical	0.87595	Subpopulation2
PI641073	TZEI13	45.8727	46.4307	0.054761	0.867391	0.077848	Tropical	0.867391	Subpopulation2
PI641074	TZEI14	55.9565	49.6749	0.094706	0.879126	0.026168	Tropical	0.879126	Subpopulation2
PI641075	TZEI15	57.0766	45.2196	0.123989	0.849028	0.026983	Tropical	0.849028	Subpopulation2
PI641076	TZEI16	55.95	46.8311	0.08399	0.896234	0.019776	Tropical	0.896234	Subpopulation2
PI641224	Hi42	63.8104	60.8786	1e-06	0.987889	0.01211	Unclassified	0.987889	Subpopulation2
PI641226	Hi44	0.67552	65.1651	1e-06	0.75938	0.240619	Unclassified	0.75938	Subpopulation2
PI641229	Hi47	-200.416	-19.5409	0.019535	0.136033	0.844432	Unclassified	0.844432	Subpopulation3
PI641232	Hi50	65.1284	42.435	0.128915	0.871085	1e-06	Unclassified	0.871085	Subpopulation2
PI641238	Hi56	41.4894	52.8551	0.187835	0.749981	0.062184	Unclassified	0.749981	Subpopulation2
PI641242	Hi60	92.4414	-286.881	0.999999	1e-06	1e-06	Unclassified	0.999999	Subpopulation1
PI641243	Hi61	23.2565	43.0249	0.254525	0.615778	0.129697	Unclassified	0.615778	Admixed
PI641244	Hi62	58.6454	65.3992	1e-06	0.985844	0.014155	Unclassified	0.985844	Subpopulation2
PI641245	Hi63	57.5283	76.0282	1e-06	0.999523	0.000476	Unclassified	0.999523	Subpopulation2
PI641247	Hi65	30.6244	68.9896	1e-06	0.901558	0.098441	Unclassified	0.901558	Subpopulation2
PI641249	Hi67	58.965	70.1916	1e-06	0.999552	0.000447	Unclassified	0.999552	Subpopulation2
PI641251	TZEEI1	56.1564	67.2318	1e-06	0.983194	0.016805	Tropical	0.983194	Subpopulation2
PI641252	TZEEI2	57.6359	68.6749	1e-06	0.996196	0.003804	Tropical	0.996196	Subpopulation2
PI641253	TZEEI3	54.6225	70.6293	1e-06	0.973648	0.026352	Tropical	0.973648	Subpopulation2
PI641254	TZEEI4	62.7977	68.8067	0.01977	0.98017	6e-05	Tropical	0.98017	Subpopulation2
PI641255	TZEEI5	59.5659	72.4942	1e-06	0.983041	0.016958	Tropical	0.983041	Subpopulation2
PI641256	TZEEI6	61.5867	75.8378	1e-06	0.999999	1e-06	Tropical	0.999999	Subpopulation2
PI641257	TZEEI7	60.1366	68.409	1e-06	0.99871	0.00129	Tropical	0.99871	Subpopulation2
PI641262	TZEEI14	56.8995	63.5345	1e-06	0.972047	0.027952	Tropical	0.972047	Subpopulation2
PI641264	TZEEI17	64.5563	59.7208	0.008582	0.990379	0.001039	Tropical	0.990379	Subpopulation2
PI641265	TZEEI20	58.3371	58.6659	1e-06	0.987612	0.012387	Tropical	0.987612	Subpopulation2
PI642762	GEMS-0027	-9.03905	43.8637	0.127689	0.63385	0.238462	Unclassified	0.63385	Admixed
PI642763	GEMS-0003	-69.5621	40.1149	0.165636	0.358131	0.476234	Unclassified	0.476234	Admixed
PI642764	GEMS-0014	-106.154	8.05202	1e-06	0.437101	0.562899	Unclassified	0.562899	Admixed
PI642765	GEMS-0016	-69.788	12.1223	1e-06	0.579331	0.420668	Unclassified	0.579331	Admixed
PI643420	GEMS-0067	-68.6697	-22.4405	0.354868	0.206758	0.438375	Unclassified	0.438375	Admixed
PI644101	LH1	-36.4376	-14.3982	0.649589	0	0.35041	Stiff stalk	0.649589	Admixed
PI648423	58611InbredA632	-152.849	44.5468	0.103507	1e-06	0.896492	Stiff stalk	0.896492	Subpopulation3
PI648424	58609A632MethBc5S4	-161.886	45.7179	1e-06	1e-06	0.999999	Stiff stalk	0.999999	Subpopulation3
PI648425	58610A632MethBc5S4	-161.147	45.3511	1e-06	1e-06	0.999999	Stiff stalk	0.999999	Subpopulation3
PI648426	58612InbredB73	-298.685	-43.3564	0	1e-06	0.999999	Stiff stalk	0.999999	Subpopulation3
PI648427	58613B73MethBc5S4	-295.01	-31.0613	1e-06	1e-06	0.999999	Stiff stalk	0.999999	Subpopulation3
PI648428	58614B73MethBc5S4	-296.026	-31.1191	1e-06	0	0.999999	Unclassified	0.999999	Subpopulation3
PI648429	58615B73MethBc5S4	-290.196	-30.1776	0	0	0.999999	Stiff stalk	0.999999	Subpopulation3
PI648430	58801InbredMo17	95.1379	-297.877	0.999999	0	1e-06	Non-stiff stalk	0.999999	Subpopulation1
PI648432	58803Mo17MethBcS3	93.6329	-292.622	0.999999	0	1e-06	Non-stiff stalk	0.999999	Subpopulation1
PI651530	GEMN-0088	34.2578	31.3611	0.414259	0.509119	0.076622	Unclassified	0.509119	Admixed
PI651531	GEMS-0091	-121.876	3.55381	0.290827	0.086109	0.623064	Unclassified	0.623064	Admixed
PI651532	GEMS-0092	-139.908	3.59428	0	0.335283	0.664716	Unclassified	0.664716	Admixed
PI651533	GEMS-0093	-128.149	9.28222	0.09421	0.220734	0.685056	Unclassified	0.685056	Admixed
PI651535	GEMN-0098	29.7465	-32.1753	0.755795	0.153506	0.090698	Unclassified	0.755795	Subpopulation1
PI651536	GEMS-0100	-94.976	14.1461	0.255151	0.169072	0.575777	Unclassified	0.575777	Admixed
PI651537	GEMN-0110	69.3304	-204.373	0.999999	1e-06	1e-06	Unclassified	0.999999	Subpopulation1
PI651538	GEMN-0111	72.3188	-138.658	0.879827	0.119884	0.00029	Unclassified	0.879827	Subpopulation1
PI651539	GEMN-0112	51.6729	-15.9919	0.686663	0.253607	0.05973	Unclassified	0.686663	Admixed
PI651540	GEMS-0113	-172.055	-5.58994	0.003613	0.24176	0.754627	Unclassified	0.754627	Subpopulation3
PI651541	GEMS-0115	-180.786	13.8351	0.008748	0.158337	0.832915	Unclassified	0.832915	Subpopulation3
PI651542	GEMS-0116	-118.26	25.2746	0.134586	0.230222	0.635192	Unclassified	0.635192	Admixed
PI651543	GEMN-0117	80.2067	-211.281	0.963084	0.036915	1e-06	Unclassified	0.963084	Subpopulation1
PI651545	GEMN-0174	56.7444	-26.8378	0.791958	0.197911	0.010131	Unclassified	0.791958	Subpopulation1
PI654048	TZAR101	44.182	43.1635	0.141838	0.807169	0.050993	Tropical	0.807169	Subpopulation2
PI654049	TZAR102	36.6413	69.7253	0	0.933725	0.066274	Tropical	0.933725	Subpopulation2
PI654051	TZAR104	57.1839	67.5899	1e-06	0.997843	0.002156	Tropical	0.997843	Subpopulation2
PI658071	GEMN-0138	55.9727	-75.2471	0.822778	0.164745	0.012477	Unclassified	0.822778	Subpopulation1
PI658072	GEMN-0139	69.5673	-72.7764	0.788219	0.210089	0.001693	Unclassified	0.788219	Subpopulation1
PI658073	GEMN-0140	48.7578	-78.2026	0.741559	0.213881	0.044561	Unclassified	0.741559	Subpopulation1
PI658074	GEMN-0141	70.4247	-83.4069	0.727768	0.269317	0.002916	Unclassified	0.727768	Subpopulation1
PI658075	GEMS-0143	-196.941	3.08056	1e-06	0.150302	0.849698	Unclassified	0.849698	Subpopulation3
PI658076	GEMN-0144	58.5056	-80.7332	0.842739	0.141414	0.015846	Unclassified	0.842739	Subpopulation1
PI658077	GEMN-0145	59.4072	-54.9446	0.754753	0.224614	0.020633	Unclassified	0.754753	Subpopulation1
PI658078	GEMS-0146	-215.159	-41.1873	0.094111	1e-06	0.905889	Unclassified	0.905889	Subpopulation3
PI658079	GEMS-0147	-222.164	-35.1305	0.000514	0.102207	0.897279	Unclassified	0.897279	Subpopulation3
PI658080	GEMS-0148	-164.622	-50.3239	0.151014	0.101542	0.747444	Unclassified	0.747444	Subpopulation3
PI658081	GEMS-0149	-247.183	-42.3821	0.024895	1e-06	0.975105	Unclassified	0.975105	Subpopulation3
PI658083	GEMN-0155	38.8143	-66.3459	0.86295	0.078695	0.058356	Unclassified	0.86295	Subpopulation1
PI658084	GEMN-0156	63.1764	-67.8501	0.748955	0.236549	0.014496	Unclassified	0.748955	Subpopulation1
PI658085	GEMN-0157	61.9255	-50.0607	0.716842	0.273294	0.009864	Unclassified	0.716842	Subpopulation1
PI658086	GEMN-0158	60.3223	-71.103	0.654131	0.31971	0.026159	Unclassified	0.654131	Admixed
PI658087	GEMN-0159	67.5769	-145.887	0.999999	1e-06	1e-06	Unclassified	0.999999	Subpopulation1
PI658088	GEMS-0160	-238.339	-42.9959	0.057314	1e-06	0.942685	Unclassified	0.942685	Subpopulation3
PI658089	GEMS-0161	-176.473	-19.7736	0.030234	0.192563	0.777203	Unclassified	0.777203	Subpopulation3
PI658090	GEMS-0162	-209.657	-27.7855	0.028796	0.083065	0.88814	Unclassified	0.88814	Subpopulation3
PI659678	GEMN-0114	41.123	-37.3365	0.775244	0.184338	0.040418	Unclassified	0.775244	Subpopulation1
PI659679	GEMS-0142	-186.927	-6.40827	0.00309	0.182282	0.814627	Unclassified	0.814627	Subpopulation3
PI659681	GEMS-0163	-162.492	-4.36419	0.06712	0.153803	0.779077	Unclassified	0.779077	Subpopulation3
SC343	SC343	49.5062	27.2995	0.305019	0.646177	0.048804	Unclassified	0.646177	Admixed
Tx204	Tx204	6.5512	-62.4518	0.80819	1e-06	0.191809	Unclassified	0.80819	Subpopulation1
Tx205	Tx205	8.69161	-69.036	0.816852	1e-06	0.183147	Unclassified	0.816852	Subpopulation1
